# Supplementary material for: Genetic Determinants of Atherogenic Indexes
Source: Preprints.org preprint supplement (doi:10.20944/preprints202304.0114.v1), 2023-04-07
Supplement: Supplementary file 1 [file supplementary]

## Sheet: AIP_C2I AllAssociations
	Supplemental Table 1: All genetic variants and its association to Atherogenic Plasma Index (left columns) and Castelli 2 Index (columns L to S)
Chr	SNP	BP	A1	BETA	SE	L95	U95	STAT	P		Chr	SNP	BP	A1	TEST	BETA	STAT	P
2	GSA-rs10497528	179825261	A	0.1988	0.04191	0.1167	0.281	4.744	2.906e-06		10	rs11251177	2384323	G	ADD	0.2303	5.308	1.823e-07
16	rs12709102	88712319	G	0.1955	0.0413	0.1145	0.2764	4.734	3.041e-06		12	rs6582413	43068050	A	ADD	0.2098	5.046	6.792e-07
9	GSA-rs6145	2651962	A	-0.1685	0.04163	-0.2501	-0.08692	-4.048	3.581e-06		12	rs12817366	43065839	A	ADD	0.2003	4.776	2.494e-06
11	rs5128	116703640	C	0.1941	0.04164	0.1125	0.2757	4.662	4.248e-06		6	GSA-rs7762658	138363064	A	ADD	-0.2038	-4.768	2.586e-06
9	GSA-rs10976248	7335597	A	0.1959	0.04139	0.1147	0.277	4.732	5.066e-06		12	rs34115639	106155478	G	ADD	0.1939	4.589	5.929e-06
11	rs5072	116707583	A	0.1827	0.04195	0.1005	0.2649	4.356	1.677e-05		12	rs10880344	43063884	G	ADD	-0.1951	-4.561	6.766e-06
1	GSA-rs6703437	112499034	A	-0.1776	0.0419	-0.2597	-0.09544	-4.238	1.79e-05		23	rs4294309	45040802	G	ADD	0.191	4.418	1.278e-05
18	rs8089599 MYOM1	3129131	A	-0.1747	0.04135	-0.2558	-0.09368	-4.226	2.94e-05		15	IlmnSeq_rs261342	58731153	C	ADD	0.1904	4.322	1.944e-05
11	IlmnSeq_rs2854117	116700142	A	0.1743	0.04137	0.09319	0.2553	4.213	3.106e-05		15	rs261342	58731153	C	ADD	0.1904	4.322	1.944e-05
13	rs1323936	39992961	A	-0.1743	0.04143	-0.2555	-0.09315	-4.208	3.161e-05		1	GSA-rs6703437	112499034	A	ADD	-0.1828	-4.301	2.132e-05
14	rs33999254	97165708	A	0.1778	0.04148	0.09645	0.2591	4.285	3.278e-05		11	rs11023121	14186021	G	ADD	-0.1801	-4.263	2.506e-05
11	rs2854116	116700169	G	0.1745	0.04169	0.09281	0.2562	4.186	3.487e-05		11	IlmnSeq_rs11023121	14186021	G	ADD	-0.1791	-4.246	2.692e-05
8	rs16904195	91258967	A	0.1827	0.04288	0.09867	0.2668	4.261	3.527e-05		13	rs1329284	44170910	C	ADD	0.1821	4.344	2.765e-05
5	rs16872585	3957865	A	0.1751	0.04196	0.09281	0.2573	4.172	3.696e-05		6	rs28372443	90804081	A	ADD	0.1786	4.231	2.876e-05
5	GSA-rs34875174	85075542	G	0.1997	0.04125	0.1188	0.2805	4.84	3.84e-05		11	rs7941131	67465115	C	ADD	-0.182	-4.314	2.9008e-05
11	rs734104	116700860	G	0.1726	0.04174	0.09078	0.2544	4.135	4.31e-05		8	rs55694640	41649439	A	ADD	-0.1818	-4.307	2.907e-05
2	rs78235136	165705863	A	-0.1707	0.04135	-0.2517	-0.08963	-4.128	4.443e-05		8	rs6999814	41660854	C	ADD	-0.1822	-4.319	2.97e-05
2	GSA-rs7587400	67129177	G	-0.171	0.04154	-0.2524	-0.08958	-4.116	4.663e-05		3	rs6808150	16809683	A	ADD	-0.1818	-4.216	3.056e-05
3	rs73042968	13677622	G	0.1714	0.04169	0.08974	0.2532	4.113	4.73e-05		1	rs696979	208558547	G	ADD	-0.1893	-4.401	3.177e-05
13	GSA-rs7335330	40007199	A	-0.1702	0.04157	-0.2517	-0.08877	-4.096	5.087e-05		20	rs11696137	55198360	G	ADD	0.1884	4.416	3.288e-05
11	IlmnSeq_rs964184	116648917	C	0.1722	0.04224	0.08941	0.255	4.077	5.488e-05		5	rs55699975	124375395	G	ADD	0.1794	4.166	3.792e-05
11	rs964184	116648917	C	0.1722	0.04224	0.08941	0.255	4.077	5.488e-05		18	GSA-rs2872889	39377737	A	ADD	0.1795	4.141	4.205e-05
2	rs9789764	183373914	G	0.1731	0.0427	0.08945	0.2568	4.055	6.009e-05		18	GSA-rs1541896	39384410	A	ADD	0.1794	4.135	4.301e-05
11	IlmnSeq_rs2854116	116700169	G	0.1691	0.04173	0.08734	0.2509	4.053	6.059e-05		18	rs11082247	39385629	A	ADD	-0.172	-4.078	5.461e-05
13	rs1436261	102290452	G	0.1696	0.04189	0.08752	0.2517	4.049	6.143e-05		16	IlmnSeq_rs17648647	79112197	A	ADD	-0.1715	-4.078	5.467e-05
19	rs17882933	4943515	A	-0.1841	0.04144	-0.2653	-0.1029	-4.442	6.147e-05		16	rs17648647	79112197	A	ADD	-0.1715	-4.078	5.467e-05
9	GSA-rs10115790	7345304	A	0.1917	0.04153	0.1103	0.2731	4.616	6.244e-05		2	rs141316160	16263528	A	ADD	0.1716	4.076	5.493e-05
9	GSA-rs10125819	7337913	A	0.182	0.04136	0.1009	0.2631	4.4	6.382e-05		6	GSA-rs283547	50967007	G	ADD	-0.1734	-4.06	5.886e-05
2	rs2697291	198111312	G	0.1869	0.04275	0.1031	0.2707	4.371	6.568e-05		6	rs990482	90806835	A	ADD	0.1712	4.054	6.015e-05
11	rs483431	95979731	G	0.1672	0.04152	0.08582	0.2486	4.027	6.737e-05		11	GSA-rs72877149	23524948	G	ADD	0.178	4.054	6.03e-05
2	rs291466	191184475	G	0.1786	0.04475	0.09094	0.2664	3.992	7.754e-05		20	rs1040800	55195790	G	ADD	0.1737	4.046	6.233e-05
18	rs17737002	48769221	G	-0.1684	0.04224	-0.2512	-0.0856	-3.986	7.941e-05		6	rs6938621	134840948	C	ADD	0.1738	4.044	6.279e-05
13	rs9548763	40000941	C	-0.1651	0.04141	-0.2462	-0.08391	-3.986	7.944e-05		4	rs10805304	31525698	A	ADD	-0.17	-4.028	6.707e-05
2	rs291458	191181481	C	0.1769	0.04458	0.08948	0.2642	3.967	8.585e-05		15	rs2684789	99492045	G	ADD	0.1702	4.005	7.363e-05
1	rs115023621	83798860	G	0.1655	0.04172	0.0837	0.2472	3.966	8.642e-05		16	rs78212815	80483863	A	ADD	0.169	3.999	7.556e-05
6	IlmnSeq_rs4711446	36205673	T	-0.1695	0.04306	-0.2539	-0.08512	-3.937	9.709e-05		13	rs4769989	20874910	A	ADD	-0.1876	-4.438	8.17e-05
11	rs11236389	75020708	G	-0.1855	0.04147	-0.2668	-0.1042	-4.473	9.999e-05		4	GSA-rs41525649	94549401	A	ADD	-0.169	-3.976	8.272e-05
18	rs4243274	38645018	G	-0.1655	0.04212	-0.2481	-0.08296	-3.93	0.0001		11	rs1512123	99610166	A	ADD	0.1722	3.968	8.545e-05
3	rs9883988	130162395	A	0.163	0.0415	0.08168	0.2443	3.928	0.0001004		7	rs882460	31533784	G	ADD	0.1672	3.965	8.666e-05
6	rs9275390	32669156	A	0.1641	0.04178	0.08218	0.246	3.927	0.0001013		3	rs28932173	17051450	A	ADD	0.1672	3.941	9.524e-05
23	rs7064578	86664946	A	-0.1667	0.0425	-0.25	-0.08341	-3.923	0.0001027		14	rs33999254	97165708	A	ADD	0.1885	4.484	9.538e-05
2	rs7574949	108661004	G	0.1647	0.04209	0.08224	0.2472	3.914	0.0001065		6	rs9389191	134856353	G	ADD	0.169	3.935	9.774e-05
8	GSA-rs146732836	42369168	G	-0.1626	0.04167	-0.2443	-0.08091	-3.902	0.0001117		3	IlmnSeq_rs2339932	179728337	A	ADD	-0.1677	-3.917	0.000105
15	rs4774302	58808578	G	0.1635	0.04203	0.08116	0.2459	3.891	0.0001165		16	rs9937453	22155629	G	ADD	-0.1663	-3.917	0.0001051
11	GSA-rs10750097	116664040	G	0.1654	0.04258	0.08198	0.2489	3.885	0.0001193		4	GSA-rs4364218	161237044	G	ADD	0.1676	3.912	0.0001071
13	rs1924577	97468932	G	-0.1606	0.04146	-0.2419	-0.07937	-3.874	0.0001244		1	rs1050096	23884661	G	ADD	-0.1654	-3.91	0.0001079
8	GSA-rs79629245	82207879	A	-0.161	0.04171	-0.2428	-0.07929	-3.861	0.0001313		1	rs11102140	111172413	G	ADD	0.1682	3.909	0.0001084
7	IlmnSeq_rs245974	29295856	A	-0.1653	0.0429	-0.2494	-0.08127	-3.854	0.0001346		3	IlmnSeq_rs6800148	179731684	G	ADD	-0.166	-3.903	0.0001111
7	rs245974	29295856	A	-0.1653	0.0429	-0.2494	-0.08127	-3.854	0.0001346		12	rs12824516	52571457	A	ADD	-0.1733	-3.899	0.0001127
11	rs3109384	40118598	A	-0.1623	0.0423	-0.2452	-0.07939	-3.837	0.0001442		17	rs62081935	57242872	A	ADD	-0.1651	-3.899	0.0001131
4	rs10805304	31525698	A	-0.1597	0.04165	-0.2414	-0.07811	-3.835	0.0001452		7	rs850139	29795025	G	ADD	-0.1638	-3.894	0.0001149
18	rs11080389	10133179	A	0.1604	0.04187	0.0783	0.2424	3.83	0.000148		8	rs35497596	21956108	G	ADD	-0.1689	-3.889	0.0001172
5	rs11134800	172875435	A	-0.1594	0.04166	-0.2411	-0.07777	-3.826	0.0001503		20	rs2281479	3762095	G	ADD	0.163	3.88	0.0001216
1	rs114586262	104693530	A	0.1619	0.04231	0.07895	0.2448	3.826	0.0001508		10	rs10748555	92682060	C	ADD	-0.1669	-3.88	0.0001219
8	GSA-rs10503578	16356260	A	-0.1619	0.04232	-0.2448	-0.07891	-3.824	0.0001515		4	GSA-rs2219547	137646225	A	ADD	0.1656	3.877	0.0001232
5	rs920479	34497252	A	0.1585	0.04146	0.07722	0.2397	3.822	0.0001527		13	rs1106028	112280372	A	ADD	0.1638	3.869	0.000127
2	GSA-rs2241080	201527239	A	-0.1586	0.04156	-0.2401	-0.07718	-3.817	0.000156		5	rs458490	129170412	C	ADD	-0.1635	-3.85	0.0001368
8	IlmnSeq_rs1383888	31758989	G	0.1579	0.04148	0.07662	0.2392	3.807	0.0001622		8	rs2251898	73692121	G	ADD	-0.1618	-3.848	0.0001378
3	GSA-rs819085	130174334	G	0.1582	0.04161	0.07667	0.2398	3.803	0.000165		14	GSA-rs11160596	101148926	A	ADD	-0.1674	-3.845	0.0001398
2	IlmnSeq_rs17500558	184976157	A	-0.1662	0.04374	-0.2519	-0.08049	-3.8	0.0001664		8	rs17405819	76806584	G	ADD	0.1618	3.843	0.0001407
4	rs9328758	809787	G	-0.1624	0.04274	-0.2462	-0.07863	-3.8	0.0001671		14	rs7160073	65450630	C	ADD	-0.1623	-3.838	0.0001433
10	rs16936633	36361666	C	0.1576	0.04153	0.07621	0.239	3.795	0.0001698		2	rs10179208	45242550	A	ADD	-0.1616	-3.835	0.0001452
2	rs17500558	184976157	A	-0.1666	0.04393	-0.2527	-0.08053	-3.793	0.0001712		12	rs11111302	102959705	A	ADD	-0.1616	-3.833	0.0001464
18	GSA-rs4939809	46274508	A	-0.1589	0.04193	-0.2411	-0.07674	-3.79	0.0001731		11	GSA-rs7944690	98540682	C	ADD	0.1632	3.821	0.0001538
5	rs28615983	68749848	G	-0.1585	0.04188	-0.2406	-0.07647	-3.786	0.000176		14	rs6573466	63395660	A	ADD	-0.1662	-3.819	0.0001549
6	rs3819832	146677281	A	0.1588	0.04195	0.0766	0.241	3.786	0.000176		7	rs7790378	5222956	G	ADD	-0.1704	-3.817	0.0001557
18	rs2868930	10149570	A	-0.1577	0.04168	-0.2394	-0.07597	-3.783	0.0001784		5	rs1421766	168561511	G	ADD	0.1614	3.808	0.0001615
15	rs3101651	27929124	A	-0.1597	0.04225	-0.2426	-0.07692	-3.78	0.0001798		14	rs5005040	44501240	A	ADD	0.1616	3.807	0.0001623
2	rs6724963	165701577	A	-0.157	0.04154	-0.2384	-0.07556	-3.779	0.0001809		9	GSA-rs2253112	130320119	G	ADD	0.1657	3.807	0.0001624
4	GSA-rs117258050	160688940	G	0.1598	0.04237	0.0768	0.2429	3.773	0.0001856		6	GSA-rs41265385	170068086	A	ADD	0.1637	3.804	0.0001641
23	JHU_X.114733426	114733427	G	-0.1639	0.04346	-0.2491	-0.07875	-3.772	0.0001858		2	rs6749443	105085140	G	ADD	0.1607	3.802	0.0001654
6	rs1575342	169177156	A	0.1577	0.04183	0.07574	0.2397	3.771	0.0001867		5	rs118017379	5318415	C	ADD	0.1612	3.801	0.0001662
10	rs11257231	11713869	G	-0.16	0.04247	-0.2432	-0.07672	-3.767	0.0001897		11	rs7109000	112435333	A	ADD	-0.1616	-3.8	0.0001665
6	rs201079746	169115590	G	0.1576	0.04184	0.07555	0.2396	3.766	0.0001905		23	rs471492	69316314	A	ADD	-0.1668	-3.791	0.0001729
6	GSA-rs611993	169087076	A	0.1575	0.04195	0.07532	0.2398	3.755	0.0001981		1	rs540479	231416547	G	ADD	0.1611	3.789	0.000174
8	rs78745055	16347707	A	-0.1605	0.04276	-0.2443	-0.07667	-3.753	0.0002003		6	rs55800211	138339147	C	ADD	0.1606	3.789	0.000174
6	IlmnSeq_rs79016102	35975180	G	-0.1611	0.04294	-0.2453	-0.07697	-3.752	0.0002004		18	rs77119562	2225492	A	ADD	0.1627	3.785	0.0001766
5	rs17072775	170037782	A	0.1596	0.04258	0.07616	0.243	3.749	0.0002032		14	rs17093568	65409989	A	ADD	0.1601	3.784	0.0001774
5	rs13163680	174019090	G	-0.1559	0.04158	-0.2374	-0.07437	-3.748	0.0002034		6	GSA-rs13199020	134873987	A	ADD	0.1666	3.781	0.0001794
3	rs61241513	193998343	G	-0.1605	0.04287	-0.2445	-0.07646	-3.744	0.0002072		12	rs76124664	102952632	A	ADD	-0.1601	-3.778	0.0001816
7	rs3750131	156754981	G	-0.1554	0.04154	-0.2368	-0.07399	-3.741	0.0002095		7	rs4724462	5262602	A	ADD	-0.1612	-3.776	0.0001832
8	rs734649	118719250	A	-0.1555	0.04161	-0.2371	-0.07397	-3.738	0.000212		17	rs2258664	1030988	G	ADD	0.1592	3.776	0.0001832
4	rs340207	86357577	A	0.1574	0.04211	0.07486	0.2399	3.738	0.0002121		3	GSA-rs17042972	17036327	A	ADD	0.1601	3.774	0.0001844
11	rs10836020	33102251	A	0.1578	0.04222	0.07501	0.2405	3.737	0.0002129		8	rs4735692	76615663	A	ADD	-0.1584	-3.759	0.0001951
10	GSA-rs12571295	36826186	A	-0.1557	0.04169	-0.2374	-0.07394	-3.734	0.0002154		2	rs10469562	144463315	A	ADD	-0.1589	-3.759	0.0001957
10	rs12265836	11719010	C	-0.1585	0.04246	-0.2417	-0.07526	-3.732	0.0002166		18	rs8090665	22587183	A	ADD	-0.1586	-3.758	0.0001959
4	rs76840843	165208593	G	-0.1547	0.04147	-0.236	-0.07346	-3.731	0.0002172		14	rs2104170	65357916	A	ADD	0.1582	3.747	0.000205
18	rs673819	22065905	A	-0.1579	0.04233	-0.2409	-0.07491	-3.73	0.0002188		3	GSA-rs117661780	125023801	A	ADD	0.1584	3.74	0.0002102
4	rs79218122	165221310	A	-0.1544	0.04148	-0.2357	-0.07315	-3.724	0.0002238		4	rs1985147	96642580	G	ADD	-0.1583	-3.739	0.0002113
9	GSA-rs12552274	7294103	A	0.1546	0.04155	0.07316	0.2361	3.721	0.0002265		11	rs11023156	14255608	G	ADD	-0.1602	-3.727	0.0002213
4	rs4502640	165129362	A	-0.1548	0.04162	-0.2364	-0.07326	-3.72	0.0002269		20	IlmnSeq_rs1040745	14803454	G	ADD	-0.1567	-3.719	0.0002282
4	rs16837960	5975538	G	0.157	0.04222	0.07427	0.2397	3.719	0.0002276		13	GSA-rs1891067	112289328	G	ADD	0.1578	3.718	0.0002288
6	rs196501	169139351	G	0.1556	0.04184	0.07358	0.2376	3.718	0.0002286		18	rs1284427	13630634	A	ADD	-0.1638	-3.717	0.0002299
6	GSA-rs189436880	169078593	A	0.1568	0.04219	0.07416	0.2395	3.718	0.0002292		2	GSA-rs2099305	56347309	A	ADD	0.16	3.716	0.0002303
6	GSA-rs11154271	125156449	G	0.156	0.04198	0.07373	0.2383	3.716	0.0002302		9	GSA-rs10809855	1299536	C	ADD	-0.1566	-3.716	0.0002306
13	rs4772269	100830307	A	0.1543	0.04164	0.07268	0.2359	3.705	0.0002402		6	IlmnSeq_rs45515398	43251118	A	ADD	-0.1564	-3.708	0.0002378
3	rs717186	5862244	A	-0.1555	0.04206	-0.2379	-0.07303	-3.696	0.0002484		6	rs45515398	43251118	A	ADD	-0.1564	-3.708	0.0002378
2	GSA-rs2887218	183376487	G	0.1552	0.04202	0.07278	0.2375	3.692	0.0002527		10	IlmnSeq_rs11196301	84634847	G	ADD	0.1571	3.705	0.0002402
5	rs73330467	125694420	C	-0.1549	0.04196	-0.2371	-0.07262	-3.691	0.0002538		10	rs11196301	84634847	G	ADD	0.1571	3.705	0.0002402
6	rs2076188	11779499	A	-0.1547	0.04192	-0.2368	-0.07251	-3.69	0.0002548		5	rs17472832	122680189	A	ADD	0.1609	3.7	0.0002446
18	GSA-rs9958887	22887059	A	-0.1553	0.04212	-0.2379	-0.07277	-3.688	0.0002568		9	GSA-rs56123241	112419465	A	ADD	0.1561	3.696	0.0002492
6	rs62394638	40609391	C	-0.1538	0.04176	-0.2356	-0.07192	-3.682	0.0002627		8	rs716583	53335677	G	ADD	-0.1573	-3.695	0.0002495
16	rs4520817	88785126	A	-0.1561	0.04241	-0.2392	-0.07297	-3.681	0.0002638		10	rs4494239	128431443	G	ADD	-0.1612	-3.687	0.0002571
8	rs1434277	103694457	G	0.1541	0.04188	0.07202	0.2362	3.68	0.0002647		11	GSA-rs10902219	758446	G	ADD	0.1561	3.683	0.0002616
23	rs5945605	51190482	A	-0.1549	0.04212	-0.2375	-0.07236	-3.678	0.0002666		16	rs4520817	88785126	A	ADD	-0.1585	-3.682	0.0002624
11	GSA-rs113859447	31818119	A	0.1543	0.042	0.072	0.2366	3.674	0.0002701		2	rs12622254	99479099	A	ADD	-0.1578	-3.681	0.0002631
13	GSA-rs56039128	100797610	A	0.1522	0.04143	0.07103	0.2334	3.674	0.0002701		8	rs7820576	21950426	A	ADD	-0.1608	-3.68	0.0002643
13	GSA-rs9585366	100807450	A	0.1522	0.04143	0.07103	0.2334	3.674	0.0002701		23	rs990651	45702886	C	ADD	-0.1623	-3.679	0.0002654
13	rs9518471	102301284	A	0.1543	0.04199	0.072	0.2366	3.675	0.0002702		13	rs7333428	46975365	G	ADD	-0.1558	-3.676	0.0002686
9	GSA-rs35456336	2655702	G	-0.1538	0.04189	-0.2359	-0.07167	-3.671	0.0002737		7	rs4129487	156069045	G	ADD	0.156	3.672	0.0002727
5	GSA-rs34661057	84658397	A	0.1531	0.04172	0.07137	0.2349	3.671	0.0002739		14	rs1553164	65265639	A	ADD	0.1566	3.669	0.0002753
3	rs4525847	13810670	C	0.1541	0.04201	0.0718	0.2365	3.669	0.0002757		5	rs154576	115861632	G	ADD	0.1552	3.663	0.0002816
20	rs6021149	49984479	A	0.1536	0.04188	0.07151	0.2357	3.668	0.0002771		8	GSA-rs10090648	21975006	A	ADD	0.1596	3.663	0.0002825
1	GSA-rs12402039	219374030	A	0.1538	0.04196	0.0716	0.2361	3.666	0.0002783		19	rs10401405	9709433	C	ADD	-0.158	-3.662	0.0002835
23	rs1327301	51210057	A	-0.1539	0.04201	-0.2362	-0.07154	-3.663	0.0002821		7	GSA-rs2333894	131454000	A	ADD	-0.1553	-3.661	0.0002838
11	rs5092	116693464	G	0.1534	0.04198	0.07116	0.2357	3.655	0.0002907		10	rs715814	10117897	A	ADD	0.1551	3.659	0.0002859
9	GSA-rs6476810	424327	C	-0.1542	0.04219	-0.2368	-0.07147	-3.654	0.0002917		12	GSA-rs73049123	3787238	G	ADD	0.1578	3.659	0.0002865
12	rs7137605	132008803	G	-0.1519	0.04159	-0.2334	-0.0704	-3.653	0.0002929		13	rs713401	72410061	A	ADD	-0.157	-3.659	0.0002869
1	rs12037910	39087604	A	-0.1525	0.04179	-0.2344	-0.07059	-3.649	0.0002968		8	rs2170865	21950829	C	ADD	-0.16	-3.654	0.0002918
6	rs9275439	32671521	A	0.1523	0.04174	0.0705	0.2341	3.649	0.0002973		22	GSA-rs138794	35733654	A	ADD	0.1544	3.654	0.0002921
3	GSA-rs9682532	78609963	G	-0.1517	0.04164	-0.2333	-0.07005	-3.642	0.0003051		3	rs6799845	172591359	G	ADD	-0.1539	-3.653	0.0002924
14	rs976221	24244706	A	-0.1627	0.04474	-0.2503	-0.07498	-3.636	0.0003122		14	rs34881794	103237334	G	ADD	0.1599	3.653	0.000293
7	IlmnSeq_rs3812368	29295025	A	-0.152	0.04185	-0.2341	-0.07002	-3.633	0.0003153		5	rs951482	117006071	C	ADD	0.1572	3.651	0.000295
6	rs521539	32581973	A	-0.1531	0.04213	-0.2356	-0.07049	-3.633	0.000316		12	rs4255580	52518795	A	ADD	0.1547	3.648	0.0002981
1	rs3929669	20052348	A	-0.1527	0.04206	-0.2351	-0.07024	-3.63	0.0003192		14	rs59077049	89769242	G	ADD	-0.1548	-3.648	0.0002981
8	rs604302	37004569	A	-0.1524	0.042	-0.2347	-0.07009	-3.629	0.0003207		9	GSA-rs10114729	11519008	G	ADD	0.1582	3.647	0.0002991
6	GSA-rs117810449	32445700	G	-0.1519	0.04196	-0.2341	-0.06966	-3.62	0.0003317		16	rs6498990	52675052	G	ADD	0.1566	3.646	0.0003009
1	rs2745241	19974981	A	0.1551	0.04291	0.07105	0.2392	3.616	0.0003367		13	rs1953516	20881146	A	ADD	0.1567	3.644	0.0003028
18	GSA-rs7244739	20747874	G	-0.1525	0.04216	-0.2351	-0.06982	-3.616	0.0003367		14	rs7140560	89776720	A	ADD	-0.1549	-3.643	0.0003042
9	GSA-rs72614074	3810595	A	0.1515	0.04193	0.06933	0.2337	3.614	0.0003396		16	rs1420982	51416422	G	ADD	-0.1546	-3.641	0.0003066
22	rs596224	26722944	A	-0.1516	0.04196	-0.2338	-0.06933	-3.612	0.0003411		11	rs78958473	134379083	G	ADD	0.154	3.639	0.000309
11	rs2542052	116699984	A	0.1507	0.0418	0.06881	0.2327	3.606	0.000349		21	rs2210244	23203181	G	ADD	-0.1573	-3.633	0.0003155
1	rs927204	229681006	A	0.1515	0.04201	0.06913	0.2338	3.605	0.0003501		17	rs11652021	59480038	A	ADD	-0.1584	-3.633	0.0003161
16	rs12933056	57741346	A	0.1553	0.04309	0.07081	0.2397	3.603	0.0003529		1	rs10159448	20701277	A	ADD	0.1529	3.63	0.000319
2	rs6736203	127430211	A	0.1505	0.04179	0.06856	0.2324	3.601	0.0003565		4	rs13132952	133694135	G	ADD	0.1556	3.63	0.0003194
8	GSA-rs4732600	27525305	A	-0.1493	0.04147	-0.2306	-0.06801	-3.6	0.0003571		2	GSA-rs7587400	67129177	G	ADD	-0.1539	-3.629	0.0003205
8	rs3018953	103705765	G	0.1529	0.0425	0.06961	0.2362	3.598	0.00036		6	rs651645	138033233	A	ADD	0.1572	3.629	0.0003213
18	rs4605265	67255632	G	0.1492	0.04147	0.0679	0.2304	3.597	0.0003609		3	rs10513799	184549539	A	ADD	0.1532	3.619	0.0003326
10	rs2944505	133053649	A	-0.1503	0.04181	-0.2322	-0.06836	-3.595	0.0003639		14	rs66655365	101148274	A	ADD	-0.1573	-3.616	0.0003359
1	rs10127548	83796651	A	0.1504	0.04185	0.06833	0.2324	3.593	0.0003676		16	rs8053242	12212623	A	ADD	-0.1559	-3.613	0.0003405
3	rs9880803	13677647	A	0.15	0.04184	0.06803	0.232	3.586	0.0003763		4	IlmnSeq_rs4689093	7239621	G	ADD	0.1546	3.613	0.0003406
8	rs9324440	138038764	G	-0.1545	0.04308	-0.239	-0.07007	-3.586	0.0003766		4	rs4689093	7239621	G	ADD	0.1546	3.613	0.0003406
3	rs704959	39180263	G	-0.1521	0.04246	-0.2354	-0.0689	-3.582	0.0003816		19	rs73044625	51201568	A	ADD	-0.1528	-3.611	0.0003423
1	GSA-rs35688602	87465380	C	0.1504	0.042	0.06812	0.2328	3.582	0.0003821		13	rs2481873	62907090	A	ADD	-0.1541	-3.611	0.0003433
6	rs9275332	32666943	G	0.1492	0.04166	0.0675	0.2308	3.58	0.0003848		13	rs633976	90150676	C	ADD	0.1534	3.611	0.0003434
6	rs9275407	32670037	C	0.1492	0.04166	0.0675	0.2308	3.58	0.0003848		23	rs678252	69300490	G	ADD	-0.1601	-3.608	0.000347
6	GSA-rs9275440	32671596	G	0.1492	0.04166	0.0675	0.2308	3.58	0.0003848		3	IlmnSeq_rs1442495	179521935	A	ADD	0.1524	3.608	0.0003472
11	rs61046239	109176722	A	0.1503	0.04198	0.06797	0.2325	3.579	0.0003862		18	rs7504768	40607221	A	ADD	-0.1587	-3.601	0.0003558
1	rs60855895	105984904	A	-0.1487	0.04158	-0.2302	-0.06724	-3.577	0.0003892		7	rs10254410	51425884	A	ADD	0.152	3.596	0.0003629
10	rs4323816	115646295	A	0.1549	0.04333	0.06995	0.2398	3.574	0.0003931		6	rs2249437	1595216	A	ADD	-0.1523	-3.595	0.0003644
6	rs9275371	32668296	A	0.1491	0.04172	0.06731	0.2309	3.573	0.0003945		5	rs6555763	166960247	A	ADD	0.1534	3.592	0.0003675
4	rs4446257	6004433	A	-0.1546	0.04325	-0.2393	-0.06979	-3.574	0.0003948		7	rs7799978	9716062	G	ADD	0.1525	3.592	0.000368
8	rs13257220	140096660	G	-0.1495	0.04185	-0.2315	-0.06744	-3.571	0.0003975		1	rs6697145	186910591	G	ADD	0.1537	3.59	0.0003706
16	rs2269792	19272358	C	0.1523	0.04267	0.0687	0.236	3.57	0.0004001		12	GSA-rs6538443	94014075	G	ADD	0.1553	3.59	0.0003707
12	GSA-rs79849883	96605705	G	0.1494	0.04186	0.06736	0.2315	3.569	0.0004007		6	rs11154774	134847175	A	ADD	0.1586	3.587	0.0003745
16	rs12447998	20426237	A	-0.1483	0.04157	-0.2298	-0.06688	-3.569	0.0004009		14	rs11158170	58173373	G	ADD	-0.152	-3.587	0.0003746
6	rs9275428	32670978	A	0.1487	0.04169	0.06699	0.2304	3.567	0.0004037		14	IlmnSeq_rs11158170	58173373	G	ADD	-0.1521	-3.587	0.0003751
2	rs1430197	56134827	A	-0.1502	0.04212	-0.2328	-0.06767	-3.567	0.0004043		8	rs812941	4131490	G	ADD	-0.1531	-3.585	0.0003776
18	GSA-rs7506674	3133302	A	-0.1481	0.04154	-0.2295	-0.06665	-3.564	0.0004076		16	rs78384770	4764117	C	ADD	0.152	3.584	0.0003793
5	rs2882672	153787189	A	0.1534	0.04304	0.06902	0.2377	3.564	0.0004088		3	rs28617221	55127917	A	ADD	0.1521	3.583	0.0003802
7	rs1204579	126602285	G	-0.1507	0.0423	-0.2336	-0.06783	-3.563	0.0004096		19	rs10416031	1095151	A	ADD	-0.155	-3.583	0.0003811
3	rs7643629	158778092	G	0.1503	0.0422	0.06762	0.233	3.562	0.0004105		12	IlmnSeq_rs11615641	130917475	A	ADD	0.1513	3.582	0.0003818
15	rs2715450	99538499	G	-0.1502	0.04218	-0.2329	-0.06755	-3.561	0.0004129		12	rs11615641	130917475	A	ADD	0.1513	3.582	0.0003818
13	GSA-rs17069914	47970177	G	-0.1499	0.04209	-0.2324	-0.06736	-3.56	0.0004146		7	rs73174654	154908212	G	ADD	-0.1513	-3.582	0.0003822
4	rs114183096	43985131	G	0.1496	0.04204	0.06724	0.232	3.56	0.0004154		9	GSA-rs7019491	26058260	G	ADD	0.1559	3.581	0.0003832
9	GSA-rs1220793	132254665	G	-0.1507	0.04242	-0.2339	-0.06758	-3.553	0.0004256		7	GSA-rs17712031	48263899	A	ADD	0.1512	3.581	0.0003837
11	rs1948977	90043602	A	-0.1481	0.04171	-0.2299	-0.06639	-3.552	0.000427		3	GSA-rs9647333	127158581	G	ADD	0.1526	3.578	0.0003869
18	GSA-rs1789250	76715856	A	-0.1501	0.04228	-0.233	-0.06726	-3.551	0.0004288		14	IlmnSeq_rs1663332	66444344	A	ADD	0.1515	3.573	0.000395
3	rs6599270	38970665	A	-0.1491	0.04203	-0.2315	-0.06673	-3.547	0.0004341		14	rs1663332	66444344	A	ADD	0.1515	3.573	0.000395
18	GSA-rs77149224	22080192	G	-0.1516	0.04273	-0.2353	-0.06783	-3.547	0.0004341		3	rs114766804	16928027	G	ADD	0.1509	3.572	0.0003968
13	rs7998115	47788770	G	0.1491	0.04202	0.0667	0.2314	3.547	0.0004343		17	rs1989854	67544154	A	ADD	0.153	3.571	0.0003971
5	exm2261885	17437494	A	-0.1475	0.04167	-0.2292	-0.06587	-3.541	0.0004447		5	rs59982056	79464387	A	ADD	0.1512	3.566	0.0004054
8	rs11776295	72703320	G	-0.1485	0.04194	-0.2307	-0.06627	-3.54	0.0004463		9	GSA-rs7859114	137397211	G	ADD	-0.1532	-3.566	0.0004058
20	GSA-rs12480160	49990155	G	0.1501	0.04243	0.06698	0.2333	3.538	0.0004487		12	rs2306393	68708761	G	ADD	-0.1528	-3.561	0.0004125
6	rs660895	32577380	G	-0.1486	0.04203	-0.231	-0.06626	-3.536	0.0004518		2	rs17025763	85204425	G	ADD	-0.1521	-3.561	0.000413
17	rs77841612	64751071	A	0.1476	0.04176	0.06579	0.2295	3.535	0.0004536		12	rs17824050	113036817	G	ADD	-0.1512	-3.56	0.0004147
7	rs76801540	10898225	A	-0.1492	0.04221	-0.2319	-0.06649	-3.535	0.0004537		14	rs11157292	42946163	A	ADD	0.1518	3.559	0.0004159
1	GSA-rs2274253	117603156	A	-0.1473	0.0417	-0.2291	-0.06562	-3.534	0.0004563		4	rs10008242	131615882	G	ADD	-0.154	-3.559	0.0004167
5	rs62394649	174026617	A	-0.1466	0.0415	-0.2279	-0.06526	-3.532	0.0004587		2	rs823229	2831147	A	ADD	0.155	3.558	0.0004176
23	rs5945572	51229683	A	-0.1482	0.04203	-0.2305	-0.0658	-3.526	0.0004702		20	rs237480	47993898	C	ADD	0.1532	3.556	0.0004202
5	rs17168353	134780909	G	0.1526	0.04328	0.06774	0.2374	3.525	0.0004713		23	rs6634210	139978352	C	ADD	0.1597	3.553	0.0004265
6	rs9275393	32669439	G	0.1483	0.0421	0.06584	0.2309	3.524	0.0004738		14	rs11156774	33371676	G	ADD	0.1508	3.55	0.0004298
10	rs66497206	67583196	G	0.1478	0.04198	0.06554	0.2301	3.521	0.0004778		4	rs62321977	94583187	C	ADD	-0.155	-3.548	0.0004331
7	GSA-rs117091721	45342597	A	0.1475	0.04191	0.06539	0.2297	3.52	0.0004798		1	rs2474937	118902978	G	ADD	-0.1502	-3.546	0.0004355
12	exm2267480	131976552	G	-0.1465	0.04161	-0.228	-0.0649	-3.52	0.0004806		12	GSA-rs7132054	94013143	A	ADD	0.1532	3.546	0.0004363
13	rs1415684	100784364	C	0.1461	0.04153	0.06472	0.2275	3.518	0.0004831		22	rs9608633	28019060	G	ADD	0.1524	3.546	0.0004367
10	GSA-rs7919602	2006209	C	-0.1466	0.04166	-0.2282	-0.06491	-3.518	0.0004836		13	rs9536542	54351529	A	ADD	0.1514	3.544	0.0004387
10	rs12249188	36333217	G	0.1467	0.04172	0.06491	0.2284	3.516	0.0004871		13	IlmnSeq_rs9557806	102762742	A	ADD	0.1514	3.541	0.0004448
13	rs1106028	112280372	A	0.147	0.04182	0.06504	0.229	3.515	0.0004883		13	rs9557806	102762742	A	ADD	0.1514	3.541	0.0004448
21	rs2831861	29865739	A	0.161	0.04587	0.07114	0.2509	3.511	0.0004961		7	rs62480038	151684984	A	ADD	-0.1497	-3.539	0.000448
1	rs6690359	241891040	G	0.1466	0.04179	0.06473	0.2285	3.509	0.0004997		3	rs41347750	29246192	A	ADD	0.15	3.534	0.0004569
18	rs12955466	22869485	A	-0.1464	0.04177	-0.2283	-0.06457	-3.506	0.0005059		16	rs4781935	17845571	A	ADD	-0.1513	-3.533	0.0004575
17	rs58040082	41555780	G	-0.1498	0.04273	-0.2335	-0.06602	-3.505	0.0005068		12	rs1443512	54342684	A	ADD	0.1504	3.523	0.0004743
11	rs7396851	116684164	A	0.1479	0.04219	0.06517	0.2306	3.505	0.0005076		10	IlmnSeq_rs7099000	83719507	A	ADD	-0.1494	-3.519	0.0004819
9	GSA-rs113904414	7336432	G	0.146	0.04171	0.06429	0.2278	3.501	0.0005139		23	rs6527205	32531271	A	ADD	-0.1509	-3.516	0.0004874
6	rs57440805	158101456	A	-0.1474	0.04211	-0.2299	-0.06489	-3.501	0.0005145		2	GSA-rs917962	39966594	G	ADD	0.1517	3.516	0.0004877
11	rs10501008	25501832	A	0.1497	0.04277	0.06589	0.2336	3.5	0.0005157		14	IlmnSeq_rs2146620	58126139	A	ADD	0.1495	3.516	0.0004878
15	GSA-rs7402101	72054830	A	-0.1481	0.04231	-0.231	-0.06515	-3.5	0.0005166		9	GSA-rs1327786	112546777	G	ADD	0.15	3.515	0.0004891
7	rs12919	156762248	G	-0.1459	0.04171	-0.2277	-0.06416	-3.498	0.0005195		3	rs112074828	155505991	G	ADD	0.149	3.515	0.0004895
8	rs34747136	15783377	C	0.146	0.04173	0.06418	0.2278	3.498	0.0005205		9	GSA-rs3132331	137394085	C	ADD	-0.1493	-3.514	0.0004912
2	GSA-rs115253211	188604301	G	-0.1461	0.0418	-0.2281	-0.06422	-3.496	0.0005234		4	rs13130473	64027180	G	ADD	-0.1493	-3.513	0.0004933
14	rs72642528	27397087	A	-0.1457	0.04168	-0.2274	-0.06403	-3.496	0.0005234		2	rs7586757	190441286	A	ADD	0.1539	3.509	0.0005
18	rs4800149	20744254	C	-0.1486	0.04252	-0.2319	-0.06525	-3.495	0.0005265		4	rs1865728	29212900	A	ADD	-0.1487	-3.509	0.0005
1	rs1106529	119531497	G	0.1456	0.0417	0.06387	0.2273	3.492	0.0005323		4	exm2265854	93479275	G	ADD	0.1497	3.508	0.0005019
14	IlmnSeq_rs12372856	33777142	G	-0.1475	0.04225	-0.2303	-0.0647	-3.492	0.0005325		2	rs868559	465300	A	ADD	0.1501	3.507	0.000503
14	rs12372856	33777142	G	-0.1475	0.04225	-0.2303	-0.0647	-3.492	0.0005325		12	rs1819873	110056708	C	ADD	-0.1487	-3.506	0.0005059
7	rs62492149	152251159	A	0.1468	0.04204	0.06437	0.2292	3.491	0.0005334		5	rs60994341	79454252	A	ADD	0.1492	3.505	0.0005062
6	GSA-rs9357149	32440743	A	-0.1456	0.04173	-0.2274	-0.06381	-3.489	0.0005369		5	GSA-rs60691088	79454634	G	ADD	0.1492	3.505	0.0005062
20	GSA-rs6134815	13191613	G	0.1473	0.0422	0.06454	0.23	3.489	0.0005375		15	rs13379920	83756393	A	ADD	-0.1485	-3.505	0.0005075
9	GSA-rs4877158	82706489	A	-0.147	0.04217	-0.2297	-0.0644	-3.487	0.000541		4	rs28368769	13365455	G	ADD	0.1479	3.504	0.0005081
13	rs9317221	62688210	A	-0.1464	0.04201	-0.2287	-0.06404	-3.484	0.0005465		7	rs145278754	10894318	G	ADD	0.1485	3.504	0.0005084
14	rs12897700	26118700	A	-0.146	0.0419	-0.2281	-0.06387	-3.484	0.0005474		12	rs7963799	22313448	A	ADD	0.1546	3.503	0.0005107
11	rs11021499	95992129	A	0.1465	0.04206	0.0641	0.229	3.484	0.0005478		13	rs9805818	110130628	A	ADD	-0.1532	-3.502	0.0005121
4	GSA-rs548846	171064513	A	-0.1455	0.04178	-0.2274	-0.06366	-3.484	0.0005479		1	GSA-rs12118129	70143124	A	ADD	0.1523	3.501	0.0005137
1	rs506388	229571061	A	0.1452	0.04168	0.06349	0.2269	3.483	0.0005485		6	rs1995122	164931246	A	ADD	-0.148	-3.5	0.0005154
8	rs2035376	72761190	A	-0.1455	0.04178	-0.2274	-0.06362	-3.483	0.0005494		9	GSA-rs35167002	112531619	G	ADD	0.1498	3.499	0.0005177
4	GSA-rs4554022	164798037	A	-0.1465	0.04211	-0.229	-0.06394	-3.478	0.0005588		14	GSA-rs35179634	65417070	A	ADD	0.1485	3.499	0.0005187
2	rs13023016	113378875	G	-0.146	0.04202	-0.2284	-0.06368	-3.475	0.0005647		9	GSA-rs10981629	115865062	C	ADD	0.1511	3.497	0.0005218
3	GSA-rs4611824	94005246	G	0.1453	0.04183	0.06334	0.2273	3.474	0.0005674		14	rs2296326	65414372	G	ADD	0.1475	3.495	0.0005262
23	rs4907775	51263200	G	-0.1475	0.04247	-0.2308	-0.06428	-3.473	0.0005688		7	rs6942407	86861313	A	ADD	-0.1489	-3.495	0.0005266
18	GSA-rs8096834	67277301	C	0.1448	0.04168	0.06307	0.2265	3.473	0.0005695		3	rs12492500	16710561	A	ADD	-0.1475	-3.493	0.0005301
23	rs12559228	113585221	A	-0.1459	0.04202	-0.2283	-0.06354	-3.472	0.0005715		3	rs74344157	179536429	A	ADD	0.1474	3.492	0.0005312
13	GSA-rs17196583	100826355	A	0.1442	0.04157	0.06278	0.2257	3.47	0.0005751		22	rs134131	28128858	G	ADD	0.1476	3.492	0.0005315
20	GSA-rs12479552	38653603	G	0.1477	0.04257	0.06428	0.2311	3.47	0.0005759		3	IlmnSeq_rs358067	55100492	A	ADD	-0.1495	-3.489	0.0005366
17	rs36039921	71099671	G	-0.1519	0.0438	-0.2378	-0.06608	-3.469	0.0005783		21	rs2827086	23199607	G	ADD	-0.15	-3.489	0.0005374
15	rs62003014	36044234	C	0.1446	0.0417	0.06285	0.2263	3.467	0.0005814		11	rs606671	114271207	G	ADD	-0.1486	-3.487	0.0005407
15	GSA-rs11856426	99175000	G	-0.1455	0.04199	-0.2278	-0.06326	-3.467	0.0005828		12	rs7316045	94022971	A	ADD	0.1488	3.485	0.0005444
11	rs2542051	116697738	C	0.1445	0.04171	0.06275	0.2262	3.465	0.0005871		11	rs12804004	1242299	A	ADD	-0.1473	-3.483	0.0005498
20	GSA-rs6134814	13189298	C	0.1453	0.04197	0.063	0.2275	3.461	0.0005947		6	rs9497666	147219819	G	ADD	0.1492	3.48	0.0005555
11	rs2266788	116660686	G	0.1455	0.04207	0.06308	0.228	3.459	0.0005985		20	rs4810830	47219740	A	ADD	-0.1472	-3.478	0.0005594
7	rs10280713	40699189	A	0.1488	0.04303	0.06449	0.2332	3.459	0.0005998		23	rs760105	150396570	A	ADD	0.1542	3.473	0.0005697
20	rs58049286	1858755	A	0.1446	0.04179	0.06264	0.2265	3.459	0.0005998		12	rs10844154	32380501	A	ADD	0.1513	3.472	0.0005718
12	rs7778	133498358	C	-0.149	0.0431	-0.2335	-0.06457	-3.458	0.0006005		7	rs12699970	18186306	A	ADD	-0.1466	-3.467	0.0005825
1	GSA-rs2765278	182427355	A	0.1493	0.04319	0.06469	0.234	3.458	0.0006012		15	rs73462353	94022324	A	ADD	0.146	3.467	0.0005825
17	GSA-rs4925145	18098018	A	0.1469	0.04248	0.06361	0.2301	3.458	0.0006023		8	rs6999312	14141326	A	ADD	-0.1486	-3.466	0.0005845
16	rs8053676	88659990	G	-0.1463	0.04234	-0.2293	-0.06332	-3.456	0.0006066		4	IlmnSeq_rs6811024	20952556	G	ADD	0.1478	3.465	0.0005865
10	rs57621454	48529682	G	0.1439	0.04168	0.06216	0.2255	3.451	0.0006156		4	rs6811024	20952556	G	ADD	0.1478	3.465	0.0005865
4	rs10021912	31361796	G	-0.1439	0.0417	-0.2257	-0.06219	-3.451	0.0006166		9	GSA-rs10987786	130725693	A	ADD	0.1462	3.464	0.000589
16	rs12933918	81154448	G	-0.1443	0.04181	-0.2262	-0.06233	-3.451	0.0006166		18	GSA-rs77295708	31922948	A	ADD	0.1494	3.462	0.0005925
9	GSA-rs10121245	7335586	G	0.1441	0.04178	0.06226	0.226	3.45	0.0006183		12	GSA-rs918129	22314117	A	ADD	0.1497	3.461	0.0005956
12	rs4768918	51148437	G	-0.149	0.04319	-0.2337	-0.06435	-3.45	0.0006204		6	rs4716393	170162093	G	ADD	0.1527	3.46	0.000597
3	rs9835219	40424093	A	0.1435	0.0416	0.06194	0.225	3.449	0.0006217		2	rs1515238	146679403	A	ADD	0.1478	3.458	0.0006012
6	GSA-rs114335056	32559191	G	-0.1436	0.04166	-0.2253	-0.06196	-3.447	0.0006247		2	rs155128	182305254	G	ADD	0.1533	3.458	0.0006016
3	rs4684984	13739990	A	0.1443	0.04188	0.06221	0.2264	3.445	0.0006295		7	rs58515337	31604093	G	ADD	0.1464	3.458	0.0006022
19	rs74174308	5335735	A	0.1435	0.04164	0.06185	0.2251	3.445	0.0006296		14	rs1032015	34401104	G	ADD	-0.1506	-3.458	0.0006023
1	GSA-rs114054273	3090354	A	0.1449	0.04207	0.06245	0.2274	3.444	0.0006318		6	rs9494850	138046665	G	ADD	0.1491	3.457	0.0006039
23	rs1471174	31832032	A	-0.1487	0.04321	-0.2334	-0.06402	-3.442	0.0006374		11	rs4359197	42272091	A	ADD	0.1465	3.456	0.0006064
1	rs12568152	65029829	A	0.1435	0.0417	0.06179	0.2252	3.442	0.0006377		14	rs17114623	44446784	G	ADD	0.1481	3.456	0.0006066
20	rs6136216	17859142	G	0.1434	0.04167	0.0617	0.2251	3.44	0.0006405		16	rs9938149	88331640	C	ADD	-0.15	-3.455	0.000608
3	GSA-rs145283830	78492157	G	-0.145	0.04215	-0.2276	-0.06239	-3.44	0.0006409		6	rs7739239	150494812	A	ADD	0.1559	3.453	0.0006125
1	rs34503920	3089202	A	0.1446	0.04205	0.06216	0.227	3.438	0.0006455		1	rs75624630	223701476	A	ADD	-0.1466	-3.452	0.0006141
1	GSA-rs71634325	3089550	A	0.1446	0.04205	0.06216	0.227	3.438	0.0006455		6	rs9472570	45768804	G	ADD	-0.1468	-3.451	0.0006173
10	GSA-rs1906459	62910800	G	0.1441	0.04197	0.06187	0.2264	3.434	0.0006549		4	rs17013593	129593111	A	ADD	-0.1518	-3.45	0.0006182
11	rs2160669	116647607	G	0.1442	0.04198	0.06188	0.2264	3.434	0.0006552		16	rs1160536	27415709	A	ADD	0.1474	3.45	0.0006185
18	GSA-rs997489	50130523	A	0.1444	0.04205	0.06198	0.2268	3.434	0.0006556		10	IlmnSeq_rs4532962	106417957	C	ADD	-0.1552	-3.449	0.0006206
13	rs1875051	63197837	A	-0.1445	0.04211	-0.227	-0.06192	-3.43	0.0006637		10	rs4532962	106417957	C	ADD	-0.1552	-3.449	0.0006206
1	GSA-rs2078051	92106237	A	0.1453	0.04237	0.06224	0.2283	3.429	0.0006672		19	rs4804401	9213079	C	ADD	0.1463	3.448	0.0006221
22	GSA-rs5758701	42690262	G	-0.1437	0.04195	-0.2259	-0.06147	-3.425	0.0006759		12	rs7398676	53630558	C	ADD	0.146	3.448	0.000623
20	rs7267747	17859475	A	0.1443	0.04213	0.06172	0.2268	3.425	0.0006768		6	rs10946675	24141920	A	ADD	0.1464	3.447	0.0006259
23	rs5924006	86667586	G	-0.1499	0.04377	-0.2357	-0.06408	-3.424	0.0006798		4	GSA-rs10034650	726322	A	ADD	0.1479	3.445	0.0006295
17	rs79642939	17589272	A	0.1447	0.04228	0.06185	0.2276	3.423	0.0006825		8	rs2386492	101870990	A	ADD	0.1465	3.445	0.0006297
20	rs61752057	40040870	A	0.1423	0.04159	0.06078	0.2238	3.421	0.0006855		6	rs12197349	45767594	G	ADD	-0.1463	-3.443	0.000635
7	rs66541100	47400072	A	-0.1427	0.04176	-0.2246	-0.06085	-3.417	0.0006964		1	rs861020	209977111	A	ADD	0.1465	3.443	0.0006355
6	IlmnSeq_rs189540470	36249101	G	-0.1471	0.04306	-0.2314	-0.06267	-3.415	0.0007005		6	rs6904699	90803872	A	ADD	0.1457	3.439	0.0006429
8	rs73287130	84436906	A	-0.1437	0.04209	-0.2262	-0.06121	-3.414	0.0007032		13	rs1571621	113319706	G	ADD	-0.1463	-3.432	0.000659
18	rs638284	10140778	G	-0.1429	0.04186	-0.225	-0.06086	-3.414	0.0007045		1	exm2265004	45788479	G	ADD	-0.1452	-3.432	0.0006608
18	rs7504768	40607221	A	-0.1484	0.04347	-0.2336	-0.06317	-3.413	0.000706		12	rs76479862	110071748	A	ADD	-0.1455	-3.431	0.0006624
8	rs2514731	119157032	A	0.1479	0.04333	0.06297	0.2328	3.413	0.0007063		3	rs9828621	179746438	A	ADD	-0.1458	-3.43	0.0006644
3	GSA-rs60183346	58117724	A	-0.144	0.04221	-0.2267	-0.06125	-3.411	0.0007111		14	GSA-rs230722	65317873	A	ADD	0.1452	3.43	0.0006648
10	rs313452	4689842	A	-0.1427	0.04184	-0.2247	-0.06066	-3.41	0.000714		5	GSA-rs6876152	124376698	G	ADD	0.149	3.429	0.0006684
1	GSA-rs526985	87316418	A	0.1434	0.04208	0.06095	0.2259	3.408	0.0007182		9	IlmnSeq_rs2230806	107620867	A	ADD	-0.1462	-3.428	0.0006704
4	rs9993962	11515688	G	-0.1419	0.04166	-0.2236	-0.06023	-3.406	0.0007256		9	rs2230806	107620867	A	ADD	-0.1462	-3.428	0.0006704
1	GSA-rs7555103	230648705	G	0.1432	0.04206	0.0608	0.2257	3.405	0.0007258		12	rs11830104	94030479	A	ADD	0.1451	3.427	0.0006716
15	rs7173022	89371612	A	-0.1429	0.04198	-0.2251	-0.06058	-3.403	0.0007321		16	rs12921148	87020911	A	ADD	-0.1461	-3.427	0.0006716
2	rs1601324	193337095	G	0.1435	0.04217	0.06083	0.2261	3.403	0.000733		14	rs7153093	44535160	C	ADD	0.1451	3.425	0.0006778
19	rs77522061	51442397	A	-0.142	0.04179	-0.2239	-0.06014	-3.399	0.000742		1	rs12742768	48065019	G	ADD	0.1453	3.424	0.000679
17	GSA-rs2158917	69926109	A	-0.144	0.04236	-0.227	-0.06096	-3.399	0.0007425		15	rs7172665	83717146	A	ADD	-0.145	-3.423	0.000682
16	rs72640452	19264977	G	0.1441	0.04239	0.06099	0.2272	3.399	0.0007434		6	rs12203841	23484136	G	ADD	0.147	3.422	0.0006844
2	rs2540058	201561779	A	0.1497	0.04409	0.0633	0.2361	3.396	0.0007511		9	IlmnSeq_rs1327796	112526289	G	ADD	0.1456	3.419	0.0006916
2	GSA-rs2687209	34114803	A	0.1417	0.04173	0.05987	0.2234	3.395	0.0007541		9	GSA-rs71497049	124758196	G	ADD	0.1472	3.418	0.0006945
6	rs60817888	32366432	A	-0.1419	0.04181	-0.2239	-0.05998	-3.395	0.0007542		5	rs2162728	173750565	G	ADD	-0.1449	-3.418	0.000695
6	rs59833897	32366537	A	-0.1419	0.04181	-0.2239	-0.05998	-3.395	0.0007542		19	rs2098684	49321007	C	ADD	-0.1456	-3.417	0.0006972
5	rs540937	4014659	G	-0.1413	0.04163	-0.2229	-0.05971	-3.394	0.000755		14	rs11847405	97165610	A	ADD	0.1449	3.415	0.000701
3	rs11706918	78643050	G	-0.1416	0.04173	-0.2233	-0.05977	-3.392	0.00076		17	GSA-rs2120659	76504429	G	ADD	-0.1492	-3.412	0.0007088
6	rs17085762	155194880	C	-0.1421	0.04192	-0.2242	-0.05991	-3.389	0.0007692		20	rs6087052	9879166	A	ADD	0.1484	3.411	0.0007119
2	rs1450251	83983420	C	0.1409	0.04165	0.05926	0.2225	3.383	0.0007867		4	GSA-rs7655014	131511809	C	ADD	0.1449	3.41	0.0007146
6	rs9456539	158026780	G	-0.142	0.042	-0.2243	-0.0597	-3.381	0.0007906		8	GSA-rs1473603	66302199	A	ADD	-0.1448	-3.409	0.0007163
13	rs9509076	20747640	G	-0.1463	0.04329	-0.2311	-0.06147	-3.38	0.0007945		16	rs9939588	20419699	A	ADD	-0.1463	-3.409	0.0007168
5	rs434097	116962366	A	0.1459	0.04317	0.06128	0.2305	3.38	0.0007957		7	rs9648731	151678416	A	ADD	-0.1444	-3.408	0.000718
3	IlmnSeq_rs9842910	125896572	A	-0.1412	0.0418	-0.2232	-0.0593	-3.378	0.0007989		13	GSA-rs9550637	20912527	G	ADD	-0.1457	-3.408	0.0007183
19	rs830140	47947982	A	-0.1418	0.042	-0.2242	-0.05951	-3.377	0.0008034		18	exm2272727	40499693	G	ADD	-0.1571	-3.408	0.0007192
2	rs12475610	391781	G	0.141	0.04175	0.05914	0.2228	3.377	0.0008042		11	GSA-rs553351	86250366	G	ADD	-0.1441	-3.408	0.0007198
11	rs10790162	116639104	A	0.1419	0.04204	0.0595	0.2243	3.375	0.0008074		7	GSA-rs12375209	10897225	A	ADD	0.1442	3.407	0.0007222
11	rs6589566	116652423	G	0.1419	0.04204	0.0595	0.2243	3.375	0.0008074		4	rs12054563	155761481	G	ADD	0.1436	3.406	0.0007246
11	rs2849176	116696921	A	0.141	0.04179	0.0591	0.2229	3.374	0.0008106		15	rs8023669	83720657	G	ADD	-0.1441	-3.406	0.0007256
10	GSA-rs1727	91066769	C	0.1411	0.04182	0.05911	0.223	3.373	0.0008136		11	rs1255522	95376448	A	ADD	0.1443	3.405	0.0007265
11	rs2075290	116653296	G	0.1417	0.04201	0.05932	0.224	3.372	0.0008175		14	rs7149242	101159416	A	ADD	0.1443	3.405	0.0007265
8	rs114201943	118719481	A	-0.142	0.04212	-0.2245	-0.05943	-3.371	0.0008201		7	rs12539907	147144359	C	ADD	0.1447	3.405	0.0007272
6	rs4708499	169228159	G	0.1403	0.04165	0.05868	0.2219	3.369	0.0008266		4	GSA-rs1454341	91711132	G	ADD	0.1456	3.404	0.0007288
18	GSA-rs4800152	20784344	G	-0.146	0.04336	-0.231	-0.06104	-3.368	0.000829		20	rs760998	36845738	A	ADD	-0.1445	-3.403	0.0007318
1	rs4949874	76161889	G	0.1406	0.04179	0.05873	0.2225	3.365	0.0008367		5	IlmnSeq_rs6555477	7587939	A	ADD	-0.145	-3.402	0.0007354
14	rs12588562	27404377	A	-0.1407	0.04183	-0.2227	-0.05871	-3.363	0.0008425		16	rs2880827	66026153	G	ADD	0.1446	3.402	0.0007354
6	rs482044	32576064	G	-0.1411	0.04196	-0.2234	-0.05889	-3.363	0.0008426		11	GSA-rs4754483	97895711	G	ADD	0.1541	3.401	0.0007382
2	GSA-rs1978650	183417141	G	0.1448	0.04305	0.06039	0.2291	3.363	0.0008442		14	rs1256061	64703593	A	ADD	-0.1448	-3.401	0.0007384
1	rs6682502	234866398	C	-0.1406	0.04183	-0.2226	-0.05867	-3.363	0.0008446		2	rs1430197	56134827	A	ADD	-0.1456	-3.4	0.0007391
2	exm2265342	113389232	G	0.1401	0.04167	0.05844	0.2218	3.362	0.0008454		14	rs4983426	105963944	G	ADD	-0.1436	-3.4	0.0007412
12	rs2288369	51748326	G	-0.1424	0.04236	-0.2255	-0.05941	-3.362	0.0008455		12	rs1064319	119866533	G	ADD	-0.1481	-3.399	0.0007425
2	rs10193657	80899394	G	0.1404	0.04176	0.05856	0.2223	3.362	0.0008458		5	rs316187	96430832	G	ADD	0.1434	3.398	0.0007446
13	IlmnSeq_rs3864	97488349	A	-0.1416	0.04211	-0.2241	-0.05905	-3.362	0.0008462		14	rs7155927	22730981	G	ADD	0.1443	3.395	0.0007528
13	rs3864	97488349	A	-0.1416	0.04211	-0.2241	-0.05905	-3.362	0.0008462		3	GSA-rs73883446	179691976	A	ADD	-0.1442	-3.393	0.0007586
6	rs9405035	32407068	A	-0.1403	0.04175	-0.2222	-0.05851	-3.361	0.0008489		11	rs4512874	134367663	A	ADD	0.1457	3.392	0.0007623
6	rs3998158	32681992	G	-0.1402	0.04171	-0.2219	-0.05845	-3.361	0.000849		11	GSA-rs4268526	134367820	A	ADD	0.1457	3.392	0.0007623
16	rs9930461	20335857	A	0.1466	0.04363	0.06113	0.2321	3.361	0.0008492		11	rs7394584	5776470	A	ADD	-0.1448	-3.391	0.0007637
2	rs7597590	201460104	G	-0.1406	0.04183	-0.2225	-0.05856	-3.36	0.0008529		6	IlmnSeq_rs73015322	163857445	A	ADD	0.1507	3.391	0.0007645
7	GSA-rs3812363	29300561	A	-0.1448	0.04311	-0.2293	-0.06034	-3.36	0.0008531		14	rs8006710	44315003	C	ADD	0.145	3.391	0.0007651
6	rs17447903	158028337	A	-0.1413	0.04206	-0.2238	-0.05887	-3.36	0.0008537		8	exm2262451	16639069	A	ADD	-0.144	-3.389	0.0007681
10	GSA-rs17875348	94429082	G	-0.1402	0.04175	-0.222	-0.05836	-3.358	0.0008596		18	rs17089264	72083984	A	ADD	0.1456	3.389	0.0007687
8	rs34329393	134569774	A	0.1401	0.04176	0.05823	0.2219	3.354	0.0008698		5	rs6861690	39153251	A	ADD	0.143	3.389	0.0007693
5	rs9687347	172961826	A	-0.1415	0.04218	-0.2241	-0.0588	-3.354	0.0008714		13	rs1571620	113319644	A	ADD	-0.1444	-3.388	0.000772
6	rs9321955	144304727	A	-0.1429	0.04262	-0.2264	-0.05937	-3.353	0.0008736		1	rs642961	209989270	A	ADD	0.1442	3.388	0.0007725
6	IlmnSeq_rs196453	169073660	A	0.1438	0.04288	0.05973	0.2278	3.353	0.0008743		12	IlmnSeq_rs12821855	130913116	A	ADD	0.1432	3.386	0.000777
6	IlmnSeq_rs196455	169074455	A	0.1438	0.04288	0.05973	0.2278	3.353	0.0008743		20	GSA-rs10211769	54095819	G	ADD	0.1481	3.385	0.0007803
6	IlmnSeq_rs659992	169076039	G	0.1438	0.04288	0.05973	0.2278	3.353	0.0008743		2	rs16853334	215951405	A	ADD	0.1436	3.383	0.0007863
6	IlmnSeq_rs660006	169076051	G	0.1438	0.04288	0.05973	0.2278	3.353	0.0008743		2	GSA-rs72843017	121036577	A	ADD	0.1508	3.383	0.0007868
6	IlmnSeq_rs674731	169077032	G	0.1438	0.04288	0.05973	0.2278	3.353	0.0008743		12	exm2260144	94010187	G	ADD	0.1444	3.382	0.0007881
6	IlmnSeq_rs675153	169077113	G	0.1438	0.04288	0.05973	0.2278	3.353	0.0008743		6	GSA-rs78481266	52512866	C	ADD	0.1448	3.381	0.0007926
19	GSA-rs147943609	5545085	A	-0.1397	0.04166	-0.2213	-0.058	-3.352	0.0008757		5	rs10050720	72023208	A	ADD	0.1428	3.378	0.0007993
17	rs8064459	41586685	A	0.1403	0.04185	0.05825	0.2223	3.352	0.0008771		18	rs76636768	5924844	A	ADD	0.1435	3.377	0.0008025
7	GSA-rs10950503	2039594	A	0.1396	0.04165	0.05793	0.2212	3.351	0.0008808		12	rs4964110	64930823	A	ADD	0.1434	3.377	0.0008042
1	rs3829794	179072728	G	0.1398	0.04173	0.05802	0.2216	3.35	0.0008824		20	rs6096573	50383679	A	ADD	0.1435	3.377	0.0008047
10	GSA-rs4917420	106353482	G	-0.1422	0.04246	-0.2254	-0.059	-3.35	0.0008845		7	rs66728126	154915201	A	ADD	-0.1433	-3.375	0.0008082
11	rs1263177	116690712	G	0.14	0.0418	0.05803	0.2219	3.348	0.0008887		22	INMG_05149	44322970	A	ADD	0.1453	3.374	0.000811
5	GSA-rs9790988	34538606	G	-0.1406	0.04203	-0.223	-0.05827	-3.347	0.0008938		22	rs2076212	44322970	A	ADD	0.1453	3.374	0.000811
18	rs4800452	20727611	G	-0.1424	0.04255	-0.2258	-0.05898	-3.346	0.0008954		12	rs7314526	53637350	A	ADD	0.1433	3.374	0.0008122
6	rs2395043	31461966	A	0.1406	0.04203	0.05824	0.223	3.346	0.0008965		14	rs11626701	94954368	A	ADD	0.144	3.37	0.0008224
5	rs505800	3927833	G	-0.141	0.04214	-0.2236	-0.05838	-3.345	0.0008978		22	rs5762430	28378472	G	ADD	-0.1446	-3.369	0.0008245
5	rs7727002	121030389	G	0.1442	0.0431	0.0597	0.2287	3.345	0.0008985		1	rs2357231	210028454	C	ADD	-0.1439	-3.368	0.000828
21	rs2832499	31317009	G	-0.1408	0.0421	-0.2233	-0.0583	-3.345	0.0008992		3	rs35280911	170619974	G	ADD	0.1447	3.367	0.0008314
4	IlmnSeq_rs4572884	102783351	A	-0.1423	0.04256	-0.2257	-0.0589	-3.344	0.0009016		12	rs7973629	10004538	C	ADD	0.1443	3.367	0.0008314
4	GSA-rs4572884	102783351	A	-0.1423	0.04256	-0.2257	-0.0589	-3.344	0.0009016		5	rs10455076	178213713	G	ADD	-0.1426	-3.365	0.0008382
17	rs7214541	1273322	A	0.144	0.04307	0.05959	0.2284	3.344	0.0009033		7	rs73066509	15416393	A	ADD	0.143	3.364	0.0008397
10	rs1933961	86781967	G	-0.1403	0.04196	-0.2225	-0.05803	-3.343	0.0009049		6	rs2951916	76174857	G	ADD	-0.1505	-3.364	0.0008414
14	rs7144332	27307519	A	-0.1401	0.04192	-0.2222	-0.05791	-3.342	0.0009095		8	rs6987213	125455495	C	ADD	-0.1433	-3.362	0.0008455
1	rs6680767	241168080	A	-0.142	0.04252	-0.2253	-0.05862	-3.339	0.0009189		11	IlmnSeq_rs7935705	99594162	G	ADD	0.1442	3.36	0.0008538
4	rs4697567	25318984	G	0.1403	0.04203	0.05791	0.2227	3.338	0.0009209		3	rs9290841	186666546	G	ADD	-0.1421	-3.359	0.0008552
6	rs9275377	32668667	A	0.1413	0.04236	0.05832	0.2244	3.337	0.0009261		14	rs74040143	26129593	G	ADD	0.1418	3.357	0.00086
6	GSA-rs196455	169074455	A	0.1433	0.04298	0.0591	0.2276	3.335	0.0009312		8	rs1446684	27073268	C	ADD	0.1426	3.357	0.0008608
6	rs311218	107408585	G	-0.1405	0.04219	-0.2231	-0.05777	-3.329	0.0009491		4	rs13148588	162115247	A	ADD	0.1431	3.357	0.000862
18	rs1705520	47701744	G	0.1387	0.04166	0.05701	0.2203	3.328	0.0009521		2	rs2041840	37467264	A	ADD	0.1448	3.357	0.0008638
1	GSA-rs1157148	105451694	A	-0.1393	0.04187	-0.2214	-0.05726	-3.328	0.0009553		5	rs17152537	124605555	A	ADD	0.1436	3.355	0.000867
2	rs59979824	193848340	C	0.1434	0.0431	0.05893	0.2279	3.327	0.0009562		4	rs422140	74881968	G	ADD	-0.1421	-3.354	0.0008698
1	rs2478167	92098307	G	0.1409	0.04233	0.05788	0.2238	3.327	0.0009563		1	rs502840	231415485	C	ADD	0.1427	3.354	0.000871
13	IlmnSeq_rs9567746	47456548	G	0.1407	0.0423	0.05781	0.2236	3.327	0.0009585		18	rs35719335	4933928	A	ADD	0.1424	3.353	0.0008743
13	rs9567746	47456548	G	0.1405	0.04226	0.05771	0.2234	3.326	0.0009613		8	rs7009954	68969814	A	ADD	0.1441	3.352	0.0008767
1	rs1032215	188124446	A	-0.1386	0.04167	-0.2202	-0.0569	-3.325	0.0009622		6	rs9376452	140016409	A	ADD	0.144	3.352	0.0008768
2	rs909270	191233175	G	0.144	0.04334	0.05905	0.2289	3.322	0.0009727		2	rs34216027	206722334	G	ADD	-0.1434	-3.351	0.0008786
6	rs1964995	32449411	G	-0.1396	0.04201	-0.2219	-0.05725	-3.323	0.0009728		11	rs10500973	24038287	A	ADD	0.1422	3.352	0.0008787
18	rs870471	57386514	A	-0.1397	0.04207	-0.2222	-0.05726	-3.321	0.0009764		3	rs9858145	99414479	A	ADD	-0.1413	-3.35	0.0008826
14	GSA-rs77488561	22518515	G	0.1388	0.04179	0.05689	0.2207	3.321	0.0009767		3	rs9878647	84004695	G	ADD	-0.1419	-3.35	0.0008832
3	rs13070197	5912019	G	-0.1392	0.04193	-0.2214	-0.05706	-3.321	0.0009778		2	GSA-rs80072814	99554388	G	ADD	-0.1429	-3.349	0.0008874
8	rs73285103	84401172	A	-0.1405	0.04234	-0.2235	-0.05754	-3.319	0.0009841		15	rs2899499	53029343	G	ADD	-0.1437	-3.348	0.0008881
12	rs79139151	96560574	A	0.1386	0.04177	0.0567	0.2204	3.318	0.0009888		6	rs239576	80730966	G	ADD	-0.1435	-3.346	0.0008943
8	rs3115771	118737687	A	-0.1382	0.04167	-0.2199	-0.05657	-3.318	0.0009893		2	rs12475610	391781	G	ADD	0.1418	3.344	0.0009022
2	rs10495537	6694519	A	-0.1399	0.04219	-0.2226	-0.05724	-3.317	0.000992		5	rs29559	123086916	A	ADD	0.1433	3.341	0.0009112
2	rs962528	6697088	A	-0.1399	0.04219	-0.2226	-0.05724	-3.317	0.000992		10	rs12767588	47641862	A	ADD	0.1431	3.341	0.0009126
20	GSA-rs6018283	45739406	A	0.1398	0.04216	0.05719	0.2224	3.317	0.0009925		23	rs4898457	153158356	G	ADD	0.1451	3.34	0.0009132
11	GSA-rs7114202	79806254	G	0.1384	0.04174	0.0566	0.2202	3.316	0.0009939		13	rs9521382	110117580	A	ADD	-0.1457	-3.34	0.000914
11	rs7110902	79899528	G	0.1392	0.04198	0.05692	0.2215	3.316	0.0009944		23	rs5925553	150449981	T	ADD	0.1453	3.337	0.0009254
5	rs12519249	79132154	A	-0.1421	0.04287	-0.2262	-0.05811	-3.316	0.0009962		11	rs11602971	134356705	A	ADD	0.1423	3.335	0.0009298
7	GSA-rs76875763	156121318	A	-0.138	0.04163	-0.2196	-0.05641	-3.315	0.0009985		18	rs28534746	57642266	A	ADD	0.1439	3.332	0.0009408
16	rs77881942	80961110	A	0.1461	0.0441	0.0597	0.2326	3.314	0.001002		10	rs7893386	59523123	G	ADD	-0.1414	-3.331	0.0009434
1	GSA-rs7530281	234858895	C	-0.139	0.04195	-0.2212	-0.05676	-3.313	0.001005		5	rs28615983	68749848	G	ADD	-0.1424	-3.33	0.0009462
6	IlmnSeq_rs675639	169077236	G	0.1418	0.0428	0.0579	0.2257	3.313	0.001006		2	rs4850895	99644472	G	ADD	-0.1423	-3.329	0.0009499
5	IlmnSeq_rs3797111	10685185	C	-0.1399	0.04224	-0.2227	-0.05713	-3.313	0.001007		21	rs2836447	39873981	A	ADD	0.144	3.329	0.0009505
5	rs3797111	10685185	C	-0.1399	0.04224	-0.2227	-0.05713	-3.313	0.001007		4	rs4076064	712222	G	ADD	0.1417	3.328	0.0009541
17	GSA-rs11656099	64793662	A	0.138	0.04166	0.0563	0.2196	3.311	0.001011		4	rs1869539	91709484	A	ADD	0.1422	3.328	0.0009555
13	GSA-rs16953568	97437875	G	-0.1383	0.04177	-0.2202	-0.05643	-3.311	0.001013		4	GSA-rs4146476	66716573	C	ADD	-0.1409	-3.327	0.0009578
7	rs6975771	116122845	A	0.1394	0.04212	0.05685	0.2219	3.31	0.001016		2	rs2160706	56359117	G	ADD	0.1457	3.327	0.000959
21	rs57292936	42191539	G	-0.1383	0.04178	-0.2202	-0.05638	-3.309	0.001018		17	rs12449893	26279731	A	ADD	0.1424	3.326	0.0009608
22	rs5767791	47937655	A	0.1375	0.04156	0.05607	0.219	3.309	0.001019		16	GSA-rs722075	17334499	A	ADD	-0.142	-3.325	0.0009624
15	GSA-rs922917	72053984	A	-0.1404	0.04245	-0.2236	-0.05719	-3.307	0.001026		4	IlmnSeq_rs1131878	70345904	G	ADD	-0.1403	-3.325	0.0009646
7	GSA-rs6977165	99269397	G	-0.1397	0.04226	-0.2226	-0.0569	-3.306	0.001029		4	rs1131878	70345904	G	ADD	-0.1403	-3.325	0.0009646
2	rs1375182	177364017	G	0.1468	0.04441	0.05977	0.2338	3.306	0.00103		18	rs11151951	72081736	G	ADD	0.1428	3.324	0.0009674
18	rs2278452	20774097	G	-0.143	0.04327	-0.2278	-0.05824	-3.306	0.00103		11	rs7935705	99594162	G	ADD	0.1431	3.324	0.0009686
16	rs4528554	7965187	G	-0.1394	0.04218	-0.222	-0.05668	-3.304	0.001038		12	rs1526852	105917765	G	ADD	-0.1413	-3.323	0.0009713
5	rs12658875	153788339	A	0.1422	0.04306	0.05783	0.2266	3.303	0.001041		7	GSA-rs10487902	16089460	A	ADD	0.1408	3.321	0.0009758
17	INMG_04356	76817090	A	-0.1378	0.04172	-0.2196	-0.05602	-3.303	0.001041		22	GSA-rs7292826	25221408	A	ADD	0.1443	3.321	0.0009788
17	rs3744793	76817090	A	-0.1378	0.04172	-0.2196	-0.05602	-3.303	0.001041		12	rs12810809	102949945	A	ADD	-0.141	-3.32	0.0009807
20	rs6139850	5812888	A	-0.1389	0.04207	-0.2214	-0.05648	-3.302	0.001042		8	rs4875319	4162862	A	ADD	-0.1413	-3.319	0.0009831
4	rs4560357	164962875	C	-0.1379	0.04176	-0.2198	-0.05606	-3.302	0.001043		9	GSA-rs303723	14469146	G	ADD	0.1408	3.319	0.0009834
1	rs7532137	165132051	G	0.1394	0.04224	0.05665	0.2222	3.301	0.001048		18	exm2260729	12013384	G	ADD	0.1449	3.319	0.0009842
8	GSA-rs35731246	84463470	A	-0.1384	0.04195	-0.2207	-0.05622	-3.3	0.00105		14	GSA-rs2268614	75416000	A	ADD	0.1424	3.318	0.0009865
16	GSA-rs8048489	14483993	A	-0.14	0.04241	-0.2231	-0.05683	-3.3	0.001052		10	rs116956181	21218709	G	ADD	0.1435	3.317	0.0009894
12	rs11068541	117999675	G	-0.1422	0.0431	-0.2266	-0.05771	-3.299	0.001055		8	rs2073618	119964052	G	ADD	0.1406	3.317	0.0009911
1	rs211718	76106675	A	0.1379	0.04183	0.0559	0.2198	3.296	0.001065		3	GSA-rs148153072	16926766	A	ADD	0.1413	3.316	0.0009943
15	IlmnSeq_rs8028759	58812199	G	0.139	0.04217	0.05633	0.2216	3.296	0.001067		2	IlmnSeq_rs2704638	206158317	G	ADD	0.1441	3.316	0.0009952
23	JHU_X.122959610	122959611	A	0.1423	0.0432	0.05762	0.2269	3.294	0.001074		2	rs2704638	206158317	G	ADD	0.1441	3.316	0.0009952
10	rs11189211	99173870	G	-0.1382	0.04197	-0.2205	-0.05597	-3.294	0.001075		16	rs4783860	55005321	A	ADD	0.1428	3.316	0.0009956
14	rs1256061	64703593	A	-0.1382	0.04197	-0.2205	-0.05598	-3.294	0.001075		12	rs11170013	52535647	A	ADD	0.1421	3.312	0.001007
9	GSA-rs10976253	7338609	A	-0.1389	0.04218	-0.2215	-0.0562	-3.292	0.001079		13	GSA-rs9567189	43998884	G	ADD	0.1402	3.312	0.001007
8	rs112681117	84272018	A	-0.1388	0.04216	-0.2214	-0.05615	-3.292	0.001082		15	rs404285	93137736	A	ADD	0.1451	3.312	0.001009
3	rs34778757	132800495	A	0.1388	0.04217	0.05615	0.2215	3.291	0.001083		11	rs7936512	5776287	G	ADD	-0.1414	-3.307	0.001025
23	rs66696789	142569289	G	0.1422	0.0432	0.05751	0.2268	3.291	0.001083		14	rs7140597	44445118	A	ADD	-0.1408	-3.307	0.001025
2	IlmnSeq_rs5018532	232077075	G	-0.1375	0.04176	-0.2193	-0.0556	-3.291	0.001084		14	rs243224	89954050	C	ADD	-0.1443	-3.307	0.001025
6	rs618368	158078716	A	-0.1384	0.04206	-0.2208	-0.05599	-3.291	0.001084		9	GSA-rs11103603	137341600	G	ADD	0.1433	3.307	0.001028
13	rs1855286	47746652	G	0.1389	0.0422	0.05617	0.2216	3.291	0.001084		12	exm2271850	69842643	G	ADD	0.1416	3.307	0.001028
2	rs7580316	188530578	A	-0.138	0.04193	-0.2202	-0.05581	-3.291	0.001086		19	rs2449630	58781680	G	ADD	-0.141	-3.307	0.001029
15	rs7183299	55841376	C	-0.138	0.04193	-0.2201	-0.05579	-3.291	0.001087		15	GSA-rs556126	48204643	A	ADD	0.1406	3.305	0.001032
18	rs7230825	72923346	A	0.1383	0.04203	0.05591	0.2207	3.29	0.001088		12	rs7979400	26943416	G	ADD	0.1517	3.304	0.001037
23	rs5955047	142580285	G	0.1411	0.04291	0.05703	0.2252	3.289	0.001093		18	IlmnSeq_rs4430856	65460503	G	ADD	0.1406	3.304	0.001037
1	rs6426901	165158705	G	0.1389	0.04224	0.05611	0.2217	3.288	0.001094		18	GSA-rs4430856	65460503	G	ADD	0.1406	3.304	0.001037
3	rs79495046	58099114	A	-0.139	0.04228	-0.2218	-0.05612	-3.287	0.001098		22	rs9613480	28004494	A	ADD	0.1423	3.303	0.001039
18	IlmnSeq_rs17802016	47603721	A	0.1392	0.04236	0.05616	0.2222	3.286	0.001105		18	rs1582761	2228201	A	ADD	0.1425	3.303	0.00104
2	rs12998150	188755699	G	0.1404	0.04273	0.05663	0.2241	3.285	0.001106		6	GSA-rs4574657	124319710	A	ADD	-0.1448	-3.302	0.001045
2	GSA-rs2042831	235857114	A	0.1379	0.04196	0.05561	0.2201	3.285	0.001107		23	rs674585	69301303	A	ADD	-0.1486	-3.301	0.001049
1	GSA-rs17464296	182420640	G	-0.1366	0.0416	-0.2181	-0.05506	-3.283	0.001113		8	rs3901245	61800976	A	ADD	0.1402	3.299	0.001055
3	rs56077693	22162114	A	-0.1389	0.04229	-0.2218	-0.05598	-3.284	0.001113		7	rs3213976	37896896	A	ADD	0.1403	3.297	0.001062
17	rs1554233	36198881	A	-0.1431	0.04358	-0.2285	-0.05766	-3.283	0.001115		14	IlmnSeq_rs1950996	58236413	A	ADD	0.1399	3.297	0.001064
7	GSA-rs10269406	10904755	A	-0.1378	0.04199	-0.2201	-0.05554	-3.283	0.001116		14	rs1950996	58236413	A	ADD	0.1399	3.297	0.001064
5	rs903845	34533481	G	-0.1401	0.04269	-0.2237	-0.05637	-3.28	0.001126		6	rs11963489	164930105	A	ADD	-0.1398	-3.296	0.001069
4	rs7693843	72405132	A	0.1379	0.04205	0.05549	0.2203	3.28	0.001128		8	rs7832226	25407292	G	ADD	0.1392	3.295	0.001069
11	rs7927267	567391	G	0.1391	0.04241	0.05598	0.2222	3.28	0.001128		16	rs7189546	51428947	A	ADD	-0.1407	-3.295	0.001069
13	rs61971612	111346151	A	-0.1424	0.04342	-0.2275	-0.0573	-3.28	0.001128		22	GSA-rs5747199	17958221	C	ADD	0.1405	3.295	0.001069
7	rs41779	116481603	G	0.1369	0.04173	0.05506	0.2186	3.28	0.001129		11	GSA-rs766926	39677738	G	ADD	0.1398	3.294	0.001072
6	rs117255025	168985028	A	0.1413	0.04311	0.05684	0.2258	3.278	0.001133		6	GSA-rs17860640	170169819	G	ADD	0.1451	3.294	0.001074
4	rs61794689	31343183	A	-0.1363	0.04161	-0.2179	-0.05479	-3.277	0.00114		3	rs6782488	16696226	G	ADD	0.1414	3.294	0.001075
23	rs5945619	51241672	G	-0.1393	0.04252	-0.2226	-0.05596	-3.276	0.001142		2	GSA-rs80335960	99690243	A	ADD	-0.1411	-3.293	0.001077
3	rs2162683	37516184	A	0.1416	0.04324	0.05681	0.2263	3.274	0.001151		17	rs7212373	75801282	G	ADD	-0.1391	-3.293	0.001078
2	rs3769451	201252335	G	-0.1381	0.0422	-0.2208	-0.05542	-3.273	0.001153		1	rs6676097	105720186	G	ADD	-0.1402	-3.292	0.001083
13	GSA-rs7996337	59997680	G	0.1374	0.04198	0.05512	0.2197	3.273	0.001154		9	IlmnSeq_rs2230805	107624029	A	ADD	-0.1406	-3.291	0.001083
17	rs854779	18044270	G	-0.1373	0.04194	-0.2195	-0.05507	-3.273	0.001154		9	GSA-rs2230805	107624029	A	ADD	-0.1406	-3.291	0.001083
5	rs10866665	172975691	G	-0.1376	0.04205	-0.22	-0.05518	-3.272	0.001157		11	GSA-rs4427580	134381231	A	ADD	0.145	3.291	0.001083
2	rs1367273	7566026	A	-0.1374	0.042	-0.2197	-0.0551	-3.272	0.001159		8	rs6980834	24138128	A	ADD	0.142	3.291	0.001085
12	rs5029067	51714720	C	0.1386	0.04238	0.05558	0.2217	3.271	0.00116		18	rs62097825	58064371	A	ADD	-0.1399	-3.291	0.001086
3	rs78476482	58166399	A	-0.1381	0.04222	-0.2209	-0.05537	-3.271	0.001161		10	rs3936496	28579751	A	ADD	0.1413	3.29	0.001087
6	rs6931277	32583357	A	-0.1365	0.04173	-0.2183	-0.05471	-3.271	0.001163		4	GSA-rs4355454	55610848	A	ADD	0.1394	3.29	0.001089
18	rs4306626	67276548	C	0.137	0.04191	0.05488	0.2191	3.27	0.001168		11	rs77816866	22729534	G	ADD	0.1406	3.289	0.001091
2	rs1430804	15194559	G	0.1384	0.04234	0.05541	0.2214	3.269	0.001171		9	IlmnSeq_rs2025878	112521535	A	ADD	-0.1469	-3.289	0.001093
2	rs10204810	185279320	G	0.1393	0.04262	0.05579	0.2229	3.269	0.001171		8	GSA-rs59886003	92965483	A	ADD	0.139	3.288	0.001096
2	GSA-rs2592774	23192909	A	-0.1376	0.04212	-0.2202	-0.05507	-3.268	0.001176		1	rs10927765	15610004	A	ADD	-0.1417	-3.286	0.001102
23	rs66666501	22884509	G	0.14	0.04286	0.05604	0.224	3.268	0.001176		19	rs7248909	36310075	A	ADD	0.1402	3.285	0.001109
3	rs2437219	5831036	A	-0.1398	0.0428	-0.2237	-0.05595	-3.267	0.001178		16	rs13338530	27029819	G	ADD	-0.1411	-3.284	0.001112
8	GSA-rs1402526	9815361	A	0.1372	0.042	0.0549	0.2195	3.267	0.001179		10	rs6602496	11395512	G	ADD	-0.1384	-3.283	0.001115
11	rs11038294	5623665	A	-0.1385	0.04242	-0.2217	-0.05538	-3.266	0.001184		4	rs4864132	133585003	C	ADD	0.1438	3.283	0.001116
16	GSA-rs62035227	66214458	G	0.1397	0.04278	0.05582	0.2235	3.265	0.001188		4	rs1109971	37803352	A	ADD	-0.1404	-3.282	0.001118
10	rs11008192	30993404	G	0.1374	0.04209	0.05487	0.2199	3.264	0.001192		6	rs648396	138413269	A	ADD	-0.1404	-3.282	0.001119
6	rs17422797	32265528	A	-0.1363	0.04178	-0.2182	-0.05446	-3.264	0.001194		2	rs13014858	115192890	G	ADD	-0.1454	-3.281	0.001122
20	rs6123098	50521290	G	-0.1385	0.04245	-0.2217	-0.05532	-3.263	0.001194		9	GSA-rs1398307	76242155	A	ADD	-0.14	-3.281	0.001123
6	rs6911639	32978178	G	0.138	0.04232	0.05508	0.221	3.262	0.001201		14	rs4982322	36454651	A	ADD	-0.14	-3.279	0.001129
3	rs13090077	5912255	A	-0.1376	0.04222	-0.2204	-0.05489	-3.26	0.001207		23	rs5911428	121973980	G	ADD	0.1435	3.279	0.001129
6	rs34192579	158030998	A	-0.1361	0.04176	-0.218	-0.05429	-3.26	0.001207		7	rs826660	147099227	A	ADD	-0.1413	-3.278	0.001134
19	GSA-rs78494164	5352828	A	0.1364	0.04184	0.0544	0.2184	3.26	0.001207		16	GSA-rs76407455	27407831	G	ADD	0.1419	3.277	0.001138
5	GSA-rs1438712	10818452	G	-0.1364	0.04186	-0.2184	-0.05434	-3.258	0.001215		4	rs6837180	698292	G	ADD	0.1411	3.277	0.001139
4	rs4692163	27087570	A	-0.1379	0.04233	-0.2209	-0.05494	-3.258	0.001216		2	rs4664919	158874478	C	ADD	-0.1425	-3.276	0.001143
14	rs11625112	23596740	A	-0.1415	0.04343	-0.2266	-0.05635	-3.258	0.001217		7	rs6956071	5254575	A	ADD	-0.1421	-3.275	0.001147
5	GSA-rs35536717	173579074	G	-0.1361	0.04178	-0.2179	-0.05417	-3.257	0.001221		2	GSA-rs2277876	99797598	A	ADD	-0.1403	-3.274	0.00115
14	GSA-rs7154510	44574349	A	0.1388	0.04263	0.05525	0.2224	3.256	0.001224		4	rs1919502	171297661	G	ADD	0.1389	3.274	0.00115
20	rs2424638	24717674	A	0.1368	0.04202	0.05445	0.2191	3.256	0.001224		9	GSA-rs1434860	26179065	G	ADD	-0.1406	-3.274	0.00115
7	rs12540414	156428612	A	-0.1385	0.04253	-0.2219	-0.05513	-3.256	0.001225		17	rs1429550	52564962	A	ADD	0.1397	3.274	0.001151
18	rs12458916	48731131	G	-0.1373	0.04218	-0.22	-0.05463	-3.255	0.001227		23	rs2734239	150462517	G	ADD	0.145	3.274	0.001152
20	rs392046	17817011	A	0.1357	0.0417	0.05397	0.2174	3.254	0.001231		16	rs201879239	55850843	A	ADD	-0.1387	-3.273	0.001153
19	rs16962840	29938906	A	0.1356	0.04168	0.05394	0.2173	3.254	0.001232		2	GSA-rs935630	2839594	G	ADD	0.1403	3.273	0.001156
7	rs4729736	101225827	G	0.1376	0.0423	0.05472	0.2206	3.254	0.001234		7	GSA-rs117660982	149438923	A	ADD	0.1401	3.273	0.001156
8	exm2270975	59985792	A	-0.1362	0.04186	-0.2182	-0.05415	-3.254	0.001234		14	rs6572349	22736248	A	ADD	0.1393	3.272	0.00116
8	rs73296961	84281077	G	-0.1367	0.042	-0.219	-0.05434	-3.254	0.001234		3	rs752466	57071029	A	ADD	-0.1389	-3.27	0.001167
16	rs9935402	88639749	G	-0.1388	0.04266	-0.2224	-0.05518	-3.253	0.001235		8	rs7015359	70794547	G	ADD	0.1399	3.27	0.001167
4	rs28368769	13365455	G	0.1355	0.04165	0.05385	0.2171	3.253	0.001237		8	IlmnSeq_rs2073618	119964052	G	ADD	0.1386	3.27	0.001168
11	GSA-rs117389554	20528205	A	-0.1361	0.04186	-0.2182	-0.05409	-3.252	0.00124		12	rs11616188	6502742	A	ADD	0.1403	3.27	0.001168
3	rs2244301	5847377	A	-0.1402	0.04312	-0.2247	-0.0557	-3.252	0.001242		2	IlmnSeq_rs1860163	158870618	A	ADD	-0.1408	-3.267	0.001179
6	rs9271588	32590953	G	-0.137	0.04213	-0.2196	-0.05442	-3.252	0.001242		6	GSA-rs458399	1209774	A	ADD	0.1399	3.267	0.00118
10	GSA-rs7918012	86752528	A	-0.1362	0.04188	-0.2183	-0.05409	-3.252	0.001243		4	rs11939871	16528679	G	ADD	-0.1395	-3.266	0.001183
21	rs2829567	26525097	A	0.142	0.04366	0.05639	0.2275	3.252	0.001243		4	rs13113004	66621266	C	ADD	0.1387	3.265	0.001185
6	IlmnSeq_rs12525551	169074585	A	0.1401	0.04309	0.05561	0.2245	3.251	0.001248		4	rs4834321	114108991	G	ADD	0.1403	3.265	0.001185
12	GSA-rs11612209	10869062	G	-0.1358	0.04179	-0.2177	-0.05388	-3.249	0.001252		9	IlmnSeq_rs10512400	112512382	A	ADD	-0.1457	-3.264	0.001191
17	rs4794858	27789546	C	-0.1375	0.0423	-0.2204	-0.05454	-3.249	0.001254		18	rs715401	30356647	A	ADD	-0.141	-3.263	0.001196
11	GSA-rs11234698	86290795	G	0.1354	0.04167	0.05371	0.2171	3.249	0.001255		13	rs585947	113311624	A	ADD	-0.1393	-3.262	0.001198
7	GSA-rs6952664	89684555	A	0.1365	0.04202	0.05414	0.2189	3.248	0.001256		9	GSA-rs11787649	74612197	A	ADD	0.139	3.262	0.0012
7	IlmnSeq_rs6977165	99269397	G	-0.1369	0.04214	-0.2194	-0.05427	-3.248	0.001258		2	GSA-rs3791211	99778735	G	ADD	-0.1396	-3.261	0.001201
3	GSA-rs2201717	130159330	A	-0.1365	0.04204	-0.2189	-0.05413	-3.248	0.001259		2	GSA-rs115095929	26678082	C	ADD	-0.1406	-3.261	0.001203
6	rs3134943	32147761	A	0.1356	0.04175	0.05376	0.2174	3.248	0.001259		12	exm2271843	52532208	A	ADD	0.1401	3.26	0.001208
7	IlmnSeq_rs6943641	70973959	G	0.1356	0.04175	0.05374	0.2174	3.247	0.001262		11	rs10897724	80638724	G	ADD	0.1467	3.259	0.001213
11	rs4910284	11241970	G	0.1368	0.04214	0.05423	0.2194	3.247	0.001263		8	rs12682124	139305026	A	ADD	-0.1385	-3.258	0.001217
3	rs2067877	155630845	G	0.14	0.04313	0.05548	0.2246	3.246	0.001266		2	IlmnSeq_rs4664919	158874478	C	ADD	-0.1413	-3.257	0.00122
12	rs3741635	106136330	A	-0.1354	0.0417	-0.2171	-0.05364	-3.246	0.001266		12	rs929291	113444418	A	ADD	-0.1425	-3.257	0.001221
5	rs17547843	146714086	G	0.1367	0.04212	0.05414	0.2192	3.245	0.001269		11	GSA-rs7115435	98346106	A	ADD	0.1414	3.256	0.001222
14	rs12889199	52346962	G	0.1374	0.04235	0.05443	0.2204	3.245	0.00127		6	rs7754419	124318348	G	ADD	-0.1423	-3.255	0.001227
2	rs7558098	76153643	A	0.1363	0.04203	0.05394	0.2187	3.244	0.001278		2	rs11885821	30600320	A	ADD	0.1379	3.254	0.001231
10	rs16931833	30966135	A	0.138	0.04256	0.0546	0.2214	3.243	0.001279		23	JHU_X.100185313	100185314	A	ADD	-0.1463	-3.253	0.001237
15	rs8035766	99522368	C	-0.1359	0.04192	-0.2181	-0.05376	-3.242	0.001282		7	GSA-rs10500181	147073554	A	ADD	0.1392	3.252	0.00124
1	IlmnSeq_rs12407570	166527543	G	0.1432	0.04415	0.05662	0.2297	3.242	0.001283		3	rs4525847	13810670	C	ADD	0.1392	3.252	0.001242
2	rs2709460	5978992	G	0.1365	0.04209	0.05396	0.219	3.242	0.001284		1	rs1981183	117206336	G	ADD	0.1375	3.252	0.001243
18	rs4369779	20735408	A	-0.1374	0.04239	-0.2205	-0.05434	-3.242	0.001285		2	rs60524475	56353831	G	ADD	0.1426	3.251	0.001244
1	GSA-rs1414406	76628659	C	0.1362	0.04201	0.05384	0.2185	3.242	0.001286		6	GSA-rs4896055	134790368	A	ADD	0.1455	3.25	0.001248
4	rs2321377	165202724	A	0.1356	0.04185	0.05359	0.2177	3.241	0.00129		2	rs2177422	215906723	A	ADD	0.1385	3.249	0.001252
6	rs9275338	32667343	T	-0.1366	0.04214	-0.2192	-0.05396	-3.24	0.001291		6	rs2064687	124376164	G	ADD	0.1402	3.249	0.001252
12	rs114136378	133516824	G	-0.14	0.04321	-0.2247	-0.05533	-3.241	0.001291		11	rs11027245	23504057	G	ADD	0.142	3.249	0.001253
3	GSA-rs9845228	7843657	A	0.1362	0.04202	0.0538	0.2185	3.24	0.001292		2	GSA-rs1527402	178513894	A	ADD	0.1427	3.249	0.001254
18	rs11082078	36021602	A	0.135	0.04168	0.05333	0.2167	3.239	0.001295		4	exm2265857	96597286	A	ADD	0.1385	3.248	0.001257
3	rs1967251	3530023	A	0.1358	0.04192	0.05363	0.2179	3.239	0.001297		2	rs17506167	3794896	A	ADD	-0.1379	-3.248	0.001258
7	rs1114970	126635100	A	0.136	0.04198	0.05368	0.2182	3.239	0.001299		6	rs12195350	43365360	G	ADD	-0.1381	-3.248	0.001258
4	rs4864603	57638765	A	-0.1352	0.04178	-0.2171	-0.05336	-3.237	0.001306		18	GSA-rs9958887	22887059	A	ADD	-0.1394	-3.248	0.00126
19	rs10409299	36324324	G	0.1357	0.04193	0.05354	0.2179	3.237	0.001307		12	rs11063272	4742688	G	ADD	0.1389	3.247	0.001261
1	IlmnSeq_rs1320555	58561954	G	0.1359	0.04199	0.05356	0.2181	3.235	0.001313		9	GSA-rs7871127	21856777	A	ADD	-0.1391	-3.246	0.001265
1	GSA-rs1320555	58561954	G	0.1359	0.04199	0.05356	0.2181	3.235	0.001313		1	rs4518871	213853968	C	ADD	0.1374	3.246	0.001267
7	GSA-rs7789674	151557843	A	-0.1359	0.04202	-0.2183	-0.05357	-3.235	0.001316		11	rs7126605	97855961	G	ADD	0.1471	3.245	0.001272
6	rs3104413	32582650	G	-0.135	0.04172	-0.2167	-0.05318	-3.235	0.001317		22	GSA-rs5759676	23621387	C	ADD	0.138	3.244	0.001278
15	rs8034036	79999423	G	0.1356	0.04193	0.05343	0.2178	3.234	0.001318		19	GSA-rs204906	45461980	A	ADD	0.1393	3.243	0.001281
17	rs8074995	64792131	A	0.1355	0.04189	0.05338	0.2176	3.234	0.001319		2	GSA-rs13403634	1771963	A	ADD	0.1373	3.241	0.001288
4	rs10019009	88583135	T	0.1375	0.04251	0.05415	0.2208	3.234	0.00132		4	GSA-rs4594673	161771838	G	ADD	0.1384	3.238	0.0013
3	GSA-rs59289675	171655374	A	-0.1349	0.04172	-0.2166	-0.0531	-3.233	0.001325		11	rs1945010	120617504	A	ADD	-0.1392	-3.238	0.0013
23	rs1218107	117395526	G	-0.1362	0.04212	-0.2187	-0.05359	-3.232	0.001327		9	GSA-rs2025878	112521535	A	ADD	-0.1446	-3.237	0.001306
9	GSA-rs7853977	423052	G	0.1364	0.04222	0.05368	0.2192	3.231	0.001331		2	rs11680616	241792959	C	ADD	0.1375	3.236	0.001309
11	rs16906210	20405135	A	-0.136	0.04209	-0.2185	-0.05349	-3.231	0.001334		11	rs6597982	788007	G	ADD	0.1373	3.233	0.001324
11	IlmnSeq_rs2072560	116661826	A	0.1365	0.04226	0.05371	0.2194	3.231	0.001334		6	rs657972	150721401	A	ADD	-0.1383	-3.232	0.00133
3	rs9842910	125896572	A	-0.1352	0.04186	-0.2173	-0.05318	-3.231	0.001335		7	rs4717581	70589949	C	ADD	0.1395	3.232	0.00133
6	rs9366764	30979793	A	-0.1353	0.0419	-0.2175	-0.05322	-3.23	0.001337		6	rs6914741	130055752	G	ADD	0.1397	3.231	0.001334
6	rs9380205	30981361	G	-0.1353	0.0419	-0.2175	-0.05322	-3.23	0.001337		18	GSA-rs503075	37283833	G	ADD	0.142	3.231	0.001334
6	rs3871466	30983683	G	-0.1353	0.0419	-0.2175	-0.05322	-3.23	0.001337		11	rs11027223	23475803	A	ADD	0.1421	3.23	0.001336
7	rs12672847	9379478	G	0.1344	0.04162	0.05285	0.216	3.23	0.00134		2	rs2311552	112409842	G	ADD	0.1373	3.23	0.001337
4	rs7667231	164826993	G	0.1353	0.04189	0.05316	0.2174	3.229	0.001342		1	GSA-rs10911952	186868740	A	ADD	0.1415	3.23	0.001338
8	rs4909706	138805964	A	0.1371	0.04245	0.05386	0.2203	3.229	0.001343		10	rs4114417	11395889	C	ADD	-0.1367	-3.23	0.001339
9	GSA-rs11787922	82788836	A	-0.1362	0.04218	-0.2188	-0.05349	-3.228	0.001346		23	rs147262106	144298716	C	ADD	0.1408	3.229	0.001342
14	rs2167109	43313172	G	-0.135	0.0418	-0.2169	-0.05302	-3.228	0.001346		18	rs11874767	3952917	C	ADD	-0.1378	-3.229	0.001344
3	rs62247834	67974734	G	-0.135	0.04182	-0.217	-0.05302	-3.228	0.001348		9	GSA-rs9409899	137406638	A	ADD	-0.1388	-3.228	0.001347
2	rs12615158	56032999	A	-0.1356	0.04202	-0.218	-0.05324	-3.227	0.001352		6	GSA-rs9342217	90744842	A	ADD	0.1371	3.228	0.001348
18	GSA-rs16977599	20782046	C	-0.1383	0.04286	-0.2223	-0.05425	-3.226	0.001358		16	GSA-rs16960741	12908309	A	ADD	0.1369	3.228	0.001348
19	GSA-rs75024748	51436940	A	-0.1349	0.04182	-0.2169	-0.05293	-3.226	0.001358		20	GSA-rs6053422	5449373	A	ADD	-0.1365	-3.226	0.001358
2	exm2263966	225867091	C	0.1349	0.04182	0.05293	0.2169	3.225	0.001359		22	rs9625172	27565531	A	ADD	0.1367	3.225	0.001358
12	rs10773903	131979463	A	-0.1383	0.04289	-0.2224	-0.05425	-3.225	0.001361		23	rs12841019	152596189	G	ADD	0.1417	3.226	0.001358
4	rs11929916	164848547	A	-0.135	0.04186	-0.217	-0.05295	-3.225	0.001363		7	rs1160324	12958992	A	ADD	-0.1396	-3.225	0.001362
9	GSA-rs17692145	21046790	A	0.1348	0.04183	0.05285	0.2168	3.224	0.001368		8	GSA-rs75183772	23788594	A	ADD	0.137	3.224	0.001363
20	GSA-rs61745440	2464984	G	0.1346	0.04177	0.05277	0.2165	3.223	0.001369		8	IlmnSeq_rs1383888	31758989	G	ADD	0.1365	3.224	0.001364
12	rs17006338	80449275	A	0.1371	0.04254	0.05373	0.2205	3.223	0.00137		7	rs850086	29772138	G	ADD	-0.1375	-3.224	0.001365
6	rs9394023	30947042	A	-0.1349	0.04187	-0.217	-0.05285	-3.222	0.001374		7	GSA-rs7790478	128348405	A	ADD	0.1437	3.224	0.001365
6	rs9268839	32428772	G	-0.1354	0.04206	-0.2178	-0.05298	-3.22	0.001386		12	rs1908660	69383716	A	ADD	0.1371	3.223	0.001369
16	rs11549837	88779739	A	-0.137	0.04255	-0.2204	-0.05357	-3.219	0.001389		10	IlmnSeq_rs61857706	92486955	G	ADD	0.1429	3.223	0.001372
8	rs1568528	84114931	G	-0.1361	0.04229	-0.2189	-0.05317	-3.217	0.001398		9	GSA-rs10115910	112460075	G	ADD	0.1371	3.222	0.001373
6	GSA-rs17054628	102075943	A	0.1354	0.04209	0.05289	0.2179	3.217	0.001401		23	rs1415636	145259962	A	ADD	0.1408	3.222	0.001373
9	GSA-rs10974325	417477	G	-0.1363	0.0424	-0.2194	-0.05321	-3.215	0.001409		3	rs73058359	29214873	A	ADD	0.1367	3.222	0.001374
9	GSA-rs2360145	30068009	A	-0.1347	0.04191	-0.2168	-0.05256	-3.214	0.001412		11	GSA-rs507211	86376739	A	ADD	-0.1374	-3.222	0.001374
18	GSA-rs8098869	20722453	G	0.1347	0.04193	0.05256	0.2169	3.213	0.001415		7	rs7782542	25377056	A	ADD	-0.1386	-3.222	0.001375
3	rs13073381	173075426	G	-0.1381	0.04296	-0.2223	-0.05386	-3.214	0.001416		10	rs3780894	45874660	G	ADD	-0.1369	-3.221	0.001379
11	IlmnSeq_rs10767612	3827301	G	-0.1355	0.04217	-0.2181	-0.05282	-3.213	0.00142		1	GSA-rs1414406	76628659	C	ADD	0.1374	3.221	0.00138
13	rs7490125	78909466	G	0.1347	0.04195	0.05252	0.217	3.212	0.001423		9	GSA-rs67222036	21861903	C	ADD	-0.1384	-3.22	0.001384
11	GSA-rs77753127	2420811	A	-0.135	0.04206	-0.2175	-0.0526	-3.211	0.001429		14	rs7151053	54172855	G	ADD	0.1418	3.22	0.001385
6	rs7774434	32657578	A	0.1336	0.0416	0.05201	0.2151	3.21	0.001431		2	rs6707649	30603962	A	ADD	0.1365	3.219	0.001388
21	rs7276718	20407289	A	0.1346	0.04194	0.05241	0.2168	3.21	0.001433		7	GSA-rs4732064	134552146	A	ADD	-0.1363	-3.219	0.001389
11	rs1978763	95991923	A	0.1347	0.04196	0.05243	0.2169	3.209	0.001435		1	GSA-rs2797531	111173494	G	ADD	-0.1365	-3.219	0.001391
19	rs17725099	18482358	A	-0.1341	0.04179	-0.216	-0.0522	-3.209	0.001437		2	rs78235136	165705863	A	ADD	-0.136	-3.218	0.001393
14	rs8016947	35832666	A	-0.1361	0.0424	-0.2192	-0.05295	-3.209	0.001438		15	rs1397255	36248979	A	ADD	0.1404	3.218	0.001393
6	rs441460	25548288	A	0.1376	0.04288	0.05353	0.2216	3.209	0.001439		5	rs7706470	82624287	G	ADD	0.1368	3.218	0.001394
3	rs34090521	133708104	A	0.1353	0.04216	0.05262	0.2179	3.208	0.001442		23	rs7063947	141369153	A	ADD	0.1403	3.217	0.0014
6	rs12529400	32333650	C	-0.134	0.04178	-0.2159	-0.0521	-3.207	0.001446		1	rs58944250	61533313	A	ADD	-0.1362	-3.216	0.001402
11	rs1945010	120617504	A	-0.1358	0.04235	-0.2188	-0.05281	-3.207	0.001447		2	GSA-rs4669155	7350493	G	ADD	-0.138	-3.216	0.001402
6	rs2298292	169056267	C	0.1375	0.04289	0.05346	0.2216	3.206	0.00145		16	rs8057668	62001249	G	ADD	0.1377	3.215	0.001409
10	GSA-rs80150005	94256847	A	-0.1337	0.04171	-0.2155	-0.05199	-3.206	0.00145		4	rs59618564	91747172	G	ADD	0.1412	3.214	0.001415
10	GSA-rs35426658	94246992	A	-0.1335	0.04165	-0.2151	-0.05187	-3.205	0.001454		2	rs115350692	99529858	A	ADD	-0.1375	-3.213	0.001416
10	GSA-rs185268677	94369099	A	-0.1335	0.04165	-0.2151	-0.05187	-3.205	0.001454		14	IlmnSeq_rs4986938	64699816	A	ADD	-0.1387	-3.213	0.001416
10	GSA-rs80223821	94438151	A	-0.1335	0.04165	-0.2151	-0.05187	-3.205	0.001454		14	rs4986938	64699816	A	ADD	-0.1387	-3.213	0.001416
16	rs12933505	88712767	A	-0.1347	0.04203	-0.2171	-0.05232	-3.205	0.001458		23	JHU_X.119502121	119502122	G	ADD	0.1422	3.213	0.001417
17	rs77766814	43314544	G	0.1346	0.04201	0.05228	0.217	3.204	0.001459		11	rs6589444	98254968	A	ADD	0.1446	3.208	0.001442
8	rs2873810	140018998	G	0.1361	0.04247	0.05285	0.2193	3.204	0.00146		6	rs588815	168109163	A	ADD	0.1374	3.207	0.001445
1	rs67304428	37968168	C	0.1351	0.04216	0.05245	0.2177	3.204	0.001461		15	rs7174982	22965658	A	ADD	0.1362	3.207	0.001446
6	rs9403542	144305568	G	0.1347	0.04203	0.05228	0.217	3.204	0.001462		2	seq-rs116816466	85268884	A	ADD	-0.138	-3.207	0.001448
20	GSA-rs73622682	45256164	C	0.1369	0.04274	0.05313	0.2207	3.203	0.001466		6	GSA-rs4716338	170063164	A	ADD	0.1412	3.206	0.00145
7	exm2266553	100529261	G	-0.1383	0.04318	-0.2229	-0.05366	-3.203	0.001469		8	rs1318278	16637512	A	ADD	-0.1364	-3.206	0.00145
10	rs745708	49445675	G	0.1386	0.0433	0.05376	0.2235	3.202	0.001473		5	rs17547843	146714086	G	ADD	0.1371	3.206	0.001451
17	rs12602228	32162363	A	0.1335	0.04169	0.05176	0.2152	3.202	0.001473		1	rs3753921	167513159	G	ADD	0.1357	3.206	0.001452
13	GSA-rs11069450	102249544	G	0.1357	0.04239	0.05262	0.2188	3.201	0.001475		23	rs2213618	128275840	A	ADD	-0.1391	-3.205	0.001454
11	rs11021504	95995448	A	0.1342	0.04195	0.05202	0.2165	3.2	0.001481		14	IlmnSeq_rs7157021	23598952	A	ADD	-0.1416	-3.204	0.001459
14	rs17278893	44566484	G	0.1365	0.04265	0.05286	0.2201	3.199	0.001485		2	rs2168046	3914206	G	ADD	0.1363	3.204	0.00146
17	rs412000	56709058	G	-0.1393	0.04355	-0.2247	-0.05396	-3.199	0.001486		6	rs3916765	32685550	A	ADD	-0.136	-3.204	0.001461
17	rs747423	76784781	A	0.1343	0.04198	0.05202	0.2166	3.199	0.001486		1	rs12725682	204936607	G	ADD	-0.1395	-3.204	0.001462
2	rs1542319	19840363	A	-0.1341	0.04192	-0.2163	-0.05194	-3.199	0.001487		9	GSA-rs7874607	21704498	G	ADD	-0.1389	-3.204	0.001462
6	rs3923809	38440970	G	-0.1335	0.04176	-0.2154	-0.0517	-3.198	0.001492		4	rs1379706	81183900	C	ADD	0.1388	3.203	0.001467
9	GSA-rs659968	82829118	G	0.1337	0.0418	0.05175	0.2156	3.198	0.001492		23	rs5936837	69318800	G	ADD	0.1435	3.202	0.001472
16	rs1304648	62025800	A	0.1336	0.04179	0.05173	0.2155	3.198	0.001492		20	GSA-rs238196	47898217	G	ADD	-0.1384	-3.202	0.001473
23	rs1984280	51344271	G	-0.1357	0.04244	-0.2189	-0.05252	-3.197	0.001494		5	rs12055008	124585022	C	ADD	0.1353	3.2	0.001479
6	GSA-rs7450001	84799300	A	-0.1345	0.04208	-0.217	-0.05204	-3.197	0.001497		8	rs111577604	1302748	G	ADD	0.1351	3.201	0.001479
10	rs7081189	126720917	A	0.1337	0.04183	0.05171	0.2157	3.196	0.001501		14	rs12588562	27404377	A	ADD	-0.1361	-3.2	0.001479
16	GSA-rs62035228	66225710	G	0.1374	0.04299	0.05314	0.2216	3.196	0.001502		19	rs757114	18970357	G	ADD	-0.1361	-3.201	0.001479
10	GSA-rs77161780	94288002	G	-0.1337	0.04184	-0.2157	-0.05169	-3.195	0.001505		3	rs59405823	69106304	A	ADD	0.1361	3.2	0.00148
18	rs4800148	20724328	G	-0.1359	0.04254	-0.2193	-0.05255	-3.195	0.001505		3	rs6795577	8693750	A	ADD	-0.1376	-3.2	0.001481
7	GSA-rs17854665	99050039	A	-0.1341	0.04196	-0.2163	-0.05183	-3.195	0.001506		16	GSA-rs4786422	3527497	A	ADD	-0.1363	-3.2	0.001482
15	GSA-rs748991	100019382	A	-0.1332	0.04169	-0.2149	-0.05147	-3.194	0.001509		16	rs78563769	48902670	C	ADD	-0.1381	-3.2	0.001482
2	rs4674302	201521731	G	-0.1338	0.04188	-0.2158	-0.05167	-3.194	0.001512		1	rs2367270	63775056	C	ADD	0.1356	3.194	0.001514
22	GSA-rs6006926	45475332	A	-0.1333	0.04175	-0.2152	-0.05152	-3.194	0.001512		1	rs11577415	62693352	A	ADD	-0.1368	-3.192	0.001523
2	rs3769874	165568585	A	-0.1338	0.04189	-0.2159	-0.05168	-3.194	0.001513		11	GSA-rs1458384	86177055	G	ADD	0.1391	3.192	0.001523
16	rs2113185	60056088	A	0.1341	0.042	0.05178	0.2164	3.193	0.001518		18	rs11664013	12582788	A	ADD	0.1386	3.192	0.001523
6	GSA-rs28366362	32565213	G	-0.1342	0.04205	-0.2166	-0.05179	-3.191	0.001527		14	rs2180952	36409577	A	ADD	0.1408	3.191	0.001527
8	rs12541651	37730368	G	-0.1332	0.04177	-0.2151	-0.05137	-3.19	0.001533		8	rs2588240	17330523	A	ADD	-0.1349	-3.191	0.001529
8	GSA-rs17366330	27064132	G	-0.1351	0.04236	-0.2181	-0.05208	-3.189	0.001535		1	GSA-rs58226141	202112692	A	ADD	0.1363	3.19	0.001532
13	rs9557710	102246839	A	-0.1356	0.04254	-0.219	-0.05224	-3.188	0.001542		5	rs17437979	107304101	G	ADD	0.1367	3.19	0.001533
2	rs75852850	87479689	A	0.1332	0.04179	0.05132	0.2151	3.188	0.001543		1	rs7539097	175669902	G	ADD	0.1359	3.19	0.001534
8	rs2514759	119126897	A	-0.134	0.04205	-0.2164	-0.05161	-3.187	0.001545		8	rs10089127	18309513	G	ADD	-0.1361	-3.19	0.001534
7	rs11767363	116140275	A	0.1343	0.04213	0.0517	0.2169	3.187	0.001547		1	rs2501910	210736508	A	ADD	0.1373	3.189	0.001535
13	rs1930826	47767039	G	0.1348	0.0423	0.05191	0.2177	3.187	0.001547		16	rs12918845	13277560	A	ADD	0.1355	3.189	0.00154
11	rs949351	86290278	A	-0.1351	0.0424	-0.2182	-0.05201	-3.187	0.001549		5	GSA-rs79099714	128645798	G	ADD	-0.1361	-3.188	0.001541
15	rs4537994	99172743	A	-0.1341	0.0421	-0.2167	-0.05161	-3.186	0.001555		5	rs6859158	165688910	C	ADD	-0.1386	-3.188	0.001541
1	rs61770556	76421902	G	0.1358	0.04262	0.05223	0.2193	3.185	0.001557		5	rs1544028	136839964	G	ADD	-0.1354	-3.187	0.001547
4	rs986807	177418660	A	-0.1328	0.04168	-0.2145	-0.05107	-3.185	0.001557		16	rs12325563	51432016	G	ADD	-0.1377	-3.187	0.001547
2	rs72999256	133198492	A	-0.1341	0.04211	-0.2166	-0.05158	-3.185	0.001559		1	GSA-rs12758343	232566207	A	ADD	0.1358	3.187	0.001549
3	rs59483301	64924331	A	0.1342	0.04213	0.0516	0.2168	3.185	0.00156		5	rs2271704	41008780	A	ADD	-0.136	-3.187	0.00155
6	rs2242653	31675765	A	-0.1354	0.04252	-0.2187	-0.05204	-3.184	0.001564		10	rs11002751	80717362	A	ADD	0.1354	3.186	0.001551
8	GSA-rs28631574	129286041	G	0.1347	0.0423	0.05177	0.2176	3.184	0.001564		8	rs1485302	119976144	A	ADD	0.1349	3.185	0.001559
14	IlmnSeq_rs12891186	34159969	G	-0.136	0.04271	-0.2197	-0.05228	-3.184	0.001564		8	GSA-rs73223800	21947214	C	ADD	0.1366	3.184	0.001567
17	GSA-rs4793323	68960599	A	0.1334	0.04191	0.05126	0.2156	3.183	0.001569		4	rs3775566	185360041	A	ADD	0.1354	3.182	0.001576
2	rs2311552	112409842	G	0.1332	0.04187	0.05117	0.2153	3.182	0.001574		2	IlmnSeq_rs6437126	158865831	A	ADD	-0.1346	-3.181	0.001581
6	rs2163293	158029504	G	-0.138	0.04336	-0.2229	-0.05298	-3.182	0.001574		6	rs2182505	51653864	A	ADD	-0.1398	-3.181	0.001581
9	rs10813951	33128021	G	0.1382	0.04343	0.05308	0.2233	3.182	0.001574		6	rs2272887	136980134	G	ADD	-0.1354	-3.179	0.001587
20	GSA-rs6044499	16873085	A	0.1334	0.04193	0.05124	0.2156	3.182	0.001575		14	exm2267726	80408653	G	ADD	-0.135	-3.179	0.001587
10	rs75122406	63174555	A	0.1359	0.04271	0.05218	0.2196	3.182	0.001576		2	rs12619096	99566864	G	ADD	-0.1361	-3.179	0.00159
3	rs6767821	43238338	C	0.1341	0.04216	0.05149	0.2168	3.181	0.001577		3	GSA-rs114008499	57321535	A	ADD	-0.1361	-3.178	0.001595
10	rs2235128	102896801	A	0.1348	0.04235	0.05175	0.2178	3.182	0.001577		16	rs3136202	14038174	A	ADD	-0.1363	-3.178	0.001597
17	rs737629	74965412	A	0.1339	0.04209	0.0514	0.2164	3.181	0.001578		7	rs76801540	10898225	A	ADD	-0.1365	-3.177	0.001599
15	rs1004496	38941557	A	0.1358	0.04269	0.05208	0.2194	3.18	0.001586		12	rs11064331	6830885	A	ADD	-0.1346	-3.177	0.001599
12	rs12307214	108044250	G	0.133	0.04184	0.05099	0.215	3.179	0.001592		14	IlmnSeq_rs4296166	32952367	A	ADD	-0.1399	-3.178	0.001599
4	rs12508420	46524214	G	-0.1382	0.0435	-0.2235	-0.05299	-3.178	0.001595		4	GSA-rs1459284	131509212	A	ADD	-0.1376	-3.177	0.0016
3	GSA-rs9829193	68299693	G	-0.135	0.0425	-0.2183	-0.0517	-3.176	0.001604		5	GSA-rs76277456	31103664	A	ADD	0.1403	3.177	0.0016
10	rs12249110	36402390	A	0.1331	0.04191	0.05098	0.2152	3.176	0.001604		14	rs61991662	93494012	A	ADD	-0.1356	-3.177	0.001601
17	GSA-rs7226340	70631212	G	-0.1341	0.04222	-0.2169	-0.05136	-3.176	0.001604		16	rs4238912	25203457	A	ADD	0.1355	3.177	0.001601
10	rs10827053	19494807	G	-0.1323	0.04165	-0.2139	-0.05066	-3.176	0.001605		7	GSA-rs11974887	134551474	G	ADD	-0.1344	-3.176	0.001606
11	rs10831500	95982642	C	0.1334	0.042	0.05104	0.2157	3.175	0.00161		7	rs11773188	154915395	A	ADD	-0.1355	-3.176	0.001609
10	rs34310065	125654184	A	0.1332	0.04196	0.05099	0.2155	3.175	0.001611		9	GSA-rs10739142	7771091	A	ADD	0.1354	3.174	0.001614
4	GSA-rs4621388	165150391	A	-0.1325	0.04173	-0.2143	-0.05067	-3.174	0.001616		3	rs10937204	184817478	A	ADD	0.1347	3.172	0.001625
7	rs10254410	51425884	A	0.1326	0.04177	0.05072	0.2145	3.174	0.001616		15	IlmnSeq_rs3825884	88616092	A	ADD	-0.138	-3.171	0.001631
9	GSA-rs11139022	83702782	A	-0.139	0.0438	-0.2249	-0.05319	-3.175	0.001616		15	rs3825884	88616092	A	ADD	-0.138	-3.171	0.001631
2	rs6727210	8609639	A	0.1369	0.04312	0.05234	0.2214	3.174	0.001619		3	GSA-rs12629334	26106208	A	ADD	0.1353	3.171	0.001633
6	rs9354065	94652407	G	-0.1363	0.04294	-0.2204	-0.05211	-3.174	0.001619		5	rs7706935	115876851	G	ADD	0.1343	3.171	0.001635
6	rs928613	45845801	A	0.1347	0.04246	0.0515	0.218	3.173	0.001623		13	rs303963	72385600	G	ADD	0.137	3.171	0.001636
17	rs1369112	31931592	C	-0.1331	0.04197	-0.2154	-0.05087	-3.172	0.001628		7	rs17350355	18928503	A	ADD	0.1344	3.169	0.001646
23	rs3827434	150342890	G	-0.1401	0.04416	-0.2266	-0.05351	-3.172	0.00163		2	GSA-rs115385373	117256330	A	ADD	0.138	3.168	0.001647
7	GSA-rs7812231	80769927	A	0.133	0.04193	0.05077	0.2151	3.171	0.001634		13	rs34117562	44103237	G	ADD	0.1341	3.169	0.001647
4	GSA-rs55835816	11473444	A	-0.1347	0.0425	-0.218	-0.05145	-3.171	0.001635		10	rs1655096	132719866	A	ADD	-0.1347	-3.168	0.001648
6	IlmnSeq_rs112447659	169048959	A	0.1363	0.04301	0.05204	0.2206	3.17	0.001639		5	GSA-rs75756577	124620415	A	ADD	0.1358	3.168	0.001652
5	rs320654	103109780	G	-0.1349	0.04257	-0.2183	-0.05146	-3.169	0.001646		9	GSA-rs10816777	111942504	A	ADD	-0.1361	-3.168	0.001652
20	rs241140	17813094	A	-0.1319	0.04165	-0.2136	-0.05028	-3.167	0.001654		15	IlmnSeq_rs785441	30156918	G	ADD	0.1361	3.168	0.001654
14	rs11628797	26078015	G	0.1328	0.04193	0.0506	0.215	3.167	0.001656		18	rs12606529	30340360	A	ADD	-0.1384	-3.167	0.001658
15	rs13379920	83756393	A	-0.1326	0.04186	-0.2146	-0.05052	-3.167	0.001657		2	GSA-rs10183853	40063438	A	ADD	-0.1353	-3.166	0.001659
6	rs12195582	32444544	A	-0.1329	0.04196	-0.2151	-0.05063	-3.166	0.001659		10	rs10829748	132254561	G	ADD	0.1389	3.166	0.00166
4	rs11945180	101238386	A	0.1362	0.04302	0.05189	0.2205	3.166	0.00166		4	rs4588519	29303608	G	ADD	-0.1351	-3.166	0.001661
4	rs6536780	164972256	A	-0.1315	0.04155	-0.213	-0.05012	-3.166	0.00166		6	rs9389946	142022955	G	ADD	0.1347	3.166	0.001661
2	seq-rs62181977	188528397	A	-0.1323	0.04181	-0.2142	-0.05037	-3.165	0.001668		10	GSA-rs7904409	55890367	G	ADD	0.1347	3.166	0.001663
6	rs11968721	35855286	A	-0.1329	0.04201	-0.2153	-0.05061	-3.165	0.001668		5	GSA-rs1320005	165703913	G	ADD	-0.1376	-3.165	0.001666
18	GSA-rs2457965	47643188	C	-0.1335	0.04221	-0.2163	-0.05082	-3.164	0.001672		9	GSA-rs3983565	110973385	G	ADD	0.1356	3.165	0.001669
3	GSA-rs10512846	131962828	A	0.1349	0.04265	0.05134	0.2185	3.164	0.001674		4	rs7682794	29166839	A	ADD	-0.134	-3.164	0.001675
4	GSA-rs12501785	180565400	A	-0.1354	0.0428	-0.2193	-0.0515	-3.163	0.001677		4	rs4521364	146709412	A	ADD	-0.1346	-3.163	0.001676
17	rs317384	32167960	C	0.1354	0.0428	0.05147	0.2193	3.162	0.001681		3	GSA-rs78155705	147227163	A	ADD	-0.1354	-3.163	0.001678
6	rs9275319	32666295	G	-0.1334	0.04218	-0.216	-0.05069	-3.162	0.001685		15	rs6497155	94575220	A	ADD	0.1337	3.162	0.001681
5	rs2194025	87798236	G	-0.1324	0.04189	-0.2145	-0.05033	-3.161	0.001687		20	rs2143712	6663715	A	ADD	-0.1343	-3.162	0.001686
9	GSA-rs10817584	117055396	A	0.133	0.04208	0.05052	0.2155	3.161	0.001692		5	GSA-rs78621882	142250776	G	ADD	-0.1345	-3.161	0.00169
2	rs78883382	87481260	A	0.1319	0.04175	0.0501	0.2138	3.16	0.001695		9	GSA-rs2210779	21721615	G	ADD	-0.136	-3.161	0.00169
6	rs4707820	94774656	A	-0.1402	0.04437	-0.2271	-0.05319	-3.159	0.001703		15	rs4965853	101954954	A	ADD	-0.1352	-3.161	0.001691
15	rs12372997	77378753	A	0.1351	0.04275	0.05125	0.2188	3.159	0.001703		22	rs13056281	27571639	G	ADD	0.1349	3.16	0.001694
21	GSA-rs2834475	35776661	C	-0.1324	0.04192	-0.2145	-0.05023	-3.158	0.001704		14	rs77704695	44304473	G	ADD	0.1346	3.16	0.001695
3	rs903056	14810290	A	0.133	0.04212	0.05046	0.2156	3.158	0.001707		2	rs6750077	60538727	G	ADD	0.1352	3.16	0.001697
6	rs2154404	143487277	C	-0.1328	0.04204	-0.2152	-0.05036	-3.158	0.001707		4	IlmnSeq_rs6830607	20948059	G	ADD	0.1344	3.159	0.001699
2	rs78598566	192723897	A	-0.1326	0.04198	-0.2148	-0.05028	-3.157	0.00171		4	GSA-rs6830607	20948059	G	ADD	0.1344	3.159	0.001699
7	rs2290393	158438186	A	-0.1327	0.04205	-0.2152	-0.05034	-3.157	0.001711		2	rs10206264	240727833	A	ADD	-0.1338	-3.159	0.001701
2	IlmnSeq_rs12464177	133627136	A	-0.1353	0.04284	-0.2192	-0.05128	-3.157	0.001712		16	rs2967879	84592327	C	ADD	0.1353	3.159	0.001701
12	rs4964791	104840423	G	0.133	0.04213	0.05043	0.2156	3.157	0.001712		21	rs59104431	47243636	A	ADD	0.1359	3.159	0.001701
4	GSA-rs17466657	7730560	A	-0.1328	0.04208	-0.2153	-0.05032	-3.156	0.001719		10	rs1710563	126128552	G	ADD	0.1351	3.158	0.001705
15	GSA-rs12903470	98557574	G	-0.133	0.04216	-0.2157	-0.05041	-3.156	0.001721		13	rs9509076	20747640	G	ADD	-0.139	-3.158	0.001706
5	GSA-rs75467304	172192629	A	0.132	0.04184	0.05001	0.214	3.155	0.001722		6	GSA-rs2327478	134774577	G	ADD	0.1414	3.157	0.001709
8	rs12550133	16378884	A	-0.1339	0.04244	-0.2171	-0.05071	-3.155	0.001724		8	rs724066	72443097	G	ADD	-0.1339	-3.158	0.001709
15	rs10520729	94007036	G	0.1316	0.04172	0.04986	0.2134	3.155	0.001724		2	rs56201838	21328501	C	ADD	0.1361	3.157	0.001712
1	rs2587538	234875603	A	-0.1319	0.04182	-0.2139	-0.04995	-3.154	0.001727		9	GSA-rs10514832	89368334	A	ADD	-0.1356	-3.157	0.001712
16	rs4783387	21233004	G	-0.1356	0.043	-0.2199	-0.05136	-3.154	0.001727		7	rs11762037	138077393	C	ADD	-0.1341	-3.157	0.001714
6	rs3134603	32126002	A	0.1311	0.04156	0.04964	0.2125	3.154	0.001728		1	rs533437	153119969	G	ADD	-0.1344	-3.155	0.001723
4	rs72685666	164817115	C	-0.1341	0.04251	-0.2174	-0.05076	-3.154	0.001729		1	rs41419149	175468685	A	ADD	-0.1347	-3.155	0.001724
11	rs1544872	43196352	G	-0.1329	0.04213	-0.2155	-0.0503	-3.154	0.001731		18	rs2347267	2485798	A	ADD	-0.1387	-3.155	0.001724
15	rs2130105	93987100	A	0.1371	0.04347	0.0519	0.2223	3.154	0.001731		2	rs10497497	178481818	C	ADD	0.1374	3.153	0.001733
5	GSA-rs4623165	163657696	A	0.137	0.04346	0.05186	0.2222	3.153	0.001732		13	rs2806907	46494486	A	ADD	-0.1345	-3.153	0.001734
6	rs9391701	30983263	A	-0.1324	0.04199	-0.2147	-0.05011	-3.153	0.001732		4	rs8180255	157548520	A	ADD	0.1353	3.153	0.001735
6	rs3869096	30984404	C	-0.1324	0.04199	-0.2147	-0.05011	-3.153	0.001732		2	rs11676250	33707734	G	ADD	0.135	3.152	0.001739
5	rs76150878	161864882	C	-0.1337	0.04239	-0.2168	-0.0506	-3.154	0.001733		18	GSA-rs7243056	57021549	A	ADD	0.1334	3.151	0.001745
21	rs3453	35819063	G	-0.132	0.04187	-0.2141	-0.04996	-3.153	0.001734		1	rs377338379	179607282	A	ADD	0.137	3.151	0.001748
7	GSA-rs56224728	157621669	A	-0.1317	0.0418	-0.2137	-0.04981	-3.152	0.001742		2	rs13005185	207304589	A	ADD	0.134	3.151	0.001749
7	rs67858229	47739439	G	0.1317	0.04179	0.04979	0.2136	3.152	0.001743		14	rs11158252	59725906	G	ADD	-0.1334	-3.151	0.001749
13	rs1499478	63192006	A	-0.1324	0.04202	-0.2147	-0.05004	-3.151	0.001747		8	exm2262498	53291161	G	ADD	0.1365	3.15	0.001751
20	rs1887405	24306446	G	-0.1363	0.04326	-0.2211	-0.0515	-3.15	0.00175		16	rs5816943	54345646	A	ADD	0.1344	3.15	0.001751
4	rs72687915	164854785	A	-0.1315	0.04175	-0.2133	-0.04969	-3.15	0.001752		2	rs7565800	47033078	G	ADD	0.1334	3.15	0.001754
20	rs6027217	58548352	A	-0.1325	0.04206	-0.2149	-0.05004	-3.149	0.001755		5	rs878076	112370590	A	ADD	-0.1332	-3.148	0.001763
11	GSA-rs35188256	58837742	A	0.1313	0.0417	0.04958	0.213	3.149	0.001759		2	rs78120576	21318633	G	ADD	0.1351	3.147	0.00177
13	rs3858749	22008438	A	-0.1315	0.04177	-0.2134	-0.04966	-3.149	0.001759		2	rs17395333	21323369	G	ADD	0.1351	3.147	0.00177
7	GSA-rs6974831	99131605	G	-0.1321	0.04201	-0.2144	-0.04975	-3.144	0.001787		1	rs6663570	239568007	G	ADD	0.134	3.147	0.001771
18	rs28575688	3128817	A	0.1314	0.04179	0.04949	0.2133	3.144	0.001787		6	GSA-rs9454625	69521787	C	ADD	-0.1354	-3.147	0.001773
13	GSA-rs34651657	62720262	G	-0.1333	0.04241	-0.2164	-0.0502	-3.144	0.001792		2	GSA-rs868294	174155192	A	ADD	0.1361	3.146	0.001775
13	GSA-rs61970547	111314129	G	0.1311	0.04172	0.04936	0.2129	3.143	0.001792		3	rs2056320	45092415	A	ADD	-0.133	-3.145	0.001781
1	rs9435672	17342659	C	-0.1316	0.04189	-0.2137	-0.04954	-3.143	0.001797		6	rs806383	160556147	A	ADD	0.1341	3.145	0.001782
6	rs4959668	2449614	A	-0.1314	0.04181	-0.2133	-0.04944	-3.143	0.001797		6	rs2998365	76169472	G	ADD	-0.1377	-3.145	0.001784
2	rs4673782	201072852	A	-0.1329	0.04229	-0.2158	-0.04999	-3.142	0.0018		16	rs9937575	25954603	G	ADD	-0.1358	-3.145	0.001784
22	GSA-rs76039265	34929202	A	-0.1322	0.04208	-0.2147	-0.04974	-3.142	0.0018		14	rs242413	56627801	A	ADD	-0.1333	-3.144	0.001785
4	IlmnSeq_rs17529377	100340586	G	-0.1325	0.04218	-0.2152	-0.04984	-3.141	0.001804		16	rs56253070	27186947	A	ADD	-0.1341	-3.144	0.001786
6	rs573762	106824104	A	-0.1319	0.04199	-0.2142	-0.04959	-3.141	0.001807		3	IlmnSeq_rs6801849	177297824	A	ADD	0.1332	3.143	0.001792
6	rs9505432	8354480	G	0.1326	0.04223	0.04983	0.2153	3.14	0.001812		6	rs1457963	77394093	G	ADD	0.1384	3.143	0.001795
14	rs12891186	34159969	G	-0.1348	0.04292	-0.2189	-0.05064	-3.14	0.001813		7	GSA-rs76058114	15906118	A	ADD	-0.1345	-3.143	0.001795
18	rs3924833	52780384	G	-0.1328	0.0423	-0.2157	-0.04991	-3.14	0.001813		3	rs3749315	104078908	G	ADD	0.1331	3.142	0.001802
2	GSA-rs4674325	201553438	C	-0.132	0.04204	-0.2143	-0.04956	-3.139	0.001818		6	GSA-rs240226	80715838	A	ADD	-0.1352	-3.141	0.001808
18	rs12607385	47777937	A	0.1334	0.04252	0.05008	0.2167	3.138	0.001824		14	GSA-rs57295267	89779372	A	ADD	-0.135	-3.14	0.001812
23	rs5967817	86632834	A	-0.1364	0.04346	-0.2216	-0.0512	-3.138	0.001825		6	rs6908341	170239266	G	ADD	0.1361	3.14	0.001813
2	rs12465459	179672711	G	0.1391	0.04434	0.05221	0.226	3.138	0.001827		4	rs67481417	175715622	G	ADD	0.1334	3.14	0.001815
6	rs12202304	130006237	A	0.1324	0.0422	0.04969	0.2151	3.137	0.001827		14	rs11850328	75426250	A	ADD	0.1351	3.139	0.001816
1	rs12048482	159409857	G	-0.1335	0.04257	-0.217	-0.05011	-3.137	0.00183		12	GSA-rs35760	102950218	A	ADD	-0.1338	-3.139	0.001819
9	GSA-rs7028550	7304787	G	0.1311	0.04179	0.04918	0.213	3.137	0.001832		1	GSA-rs1886684	92975938	A	ADD	-0.1369	-3.138	0.001821
6	IlmnSeq_rs9349256	43404511	A	0.1312	0.04184	0.04922	0.2132	3.136	0.001834		8	rs4739609	81871222	G	ADD	-0.1339	-3.138	0.001822
6	rs9349256	43404511	A	0.1312	0.04184	0.04922	0.2132	3.136	0.001834		12	rs10850390	115313527	A	ADD	0.1354	3.138	0.001823
11	rs4938303	116584987	A	-0.133	0.0424	-0.2161	-0.04987	-3.136	0.001834		8	rs611863	16691422	A	ADD	-0.1331	-3.138	0.001824
6	rs2242657	31602489	G	-0.1334	0.04253	-0.2167	-0.05002	-3.136	0.001835		12	rs714880	110093847	G	ADD	-0.1365	-3.138	0.001824
6	rs2077102	31611840	A	-0.1334	0.04253	-0.2167	-0.05002	-3.136	0.001835		12	rs73107965	48184722	A	ADD	0.1349	3.137	0.001828
6	rs2242655	31627449	C	-0.1334	0.04253	-0.2167	-0.05002	-3.136	0.001835		8	rs7835381	76574274	A	ADD	-0.1332	-3.137	0.001829
6	rs2295665	31632686	A	-0.1334	0.04253	-0.2167	-0.05002	-3.136	0.001835		8	rs6996616	24171051	A	ADD	0.135	3.137	0.001831
6	rs2280800	31646398	A	-0.1334	0.04253	-0.2167	-0.05002	-3.136	0.001835		7	GSA-rs1479842	147025943	A	ADD	0.1329	3.137	0.001832
15	rs66846923	101939756	A	0.131	0.04177	0.04913	0.2129	3.136	0.001835		4	rs17024592	96730586	G	ADD	-0.1335	-3.137	0.001833
16	rs9938149	88331640	C	-0.1344	0.04286	-0.2184	-0.05038	-3.135	0.001839		15	rs9652483	69982656	C	ADD	0.133	3.136	0.001837
6	rs7770868	38464626	A	0.1308	0.04173	0.04905	0.2126	3.135	0.00184		17	rs34834489	19620264	A	ADD	0.1336	3.135	0.00184
5	rs6885482	125054298	C	0.1333	0.04251	0.04994	0.2166	3.135	0.001844		1	rs4477310	198436809	C	ADD	0.1332	3.135	0.001841
15	GSA-rs16974006	54342034	G	0.1324	0.04226	0.0496	0.2153	3.134	0.00185		2	rs1840326	165731741	G	ADD	-0.1379	-3.135	0.001844
13	rs2649137	63179285	G	0.1325	0.04228	0.0496	0.2153	3.133	0.001854		7	rs12666488	19788403	A	ADD	-0.1334	-3.134	0.001849
10	rs912069	10945351	A	-0.138	0.04406	-0.2244	-0.05167	-3.133	0.001856		16	rs12919246	15626960	A	ADD	-0.1407	-3.133	0.001856
17	rs8076343	36981872	G	-0.1315	0.042	-0.2139	-0.04923	-3.132	0.001861		2	rs12693483	153693898	A	ADD	-0.1344	-3.132	0.001858
15	rs735480	45152371	G	-0.1346	0.04297	-0.2188	-0.05035	-3.132	0.001863		10	rs7084722	16595396	G	ADD	-0.1325	-3.132	0.00186
1	rs12407843	156873727	A	-0.131	0.04185	-0.2131	-0.049	-3.131	0.001868		8	rs77105515	115045743	A	ADD	0.1336	3.132	0.001863
8	rs56914198	76016601	A	0.1304	0.04166	0.04878	0.2121	3.131	0.001868		10	rs11251161	2363481	A	ADD	-0.1355	-3.131	0.001864
23	rs5907194	141014579	G	0.1362	0.04352	0.05094	0.2216	3.13	0.001871		21	rs2832499	31317009	G	ADD	-0.1341	-3.131	0.001866
11	rs2467372	34220504	G	0.136	0.04343	0.05084	0.2211	3.13	0.001873		23	rs4531209	35052590	A	ADD	0.1358	3.13	0.001871
6	IlmnSeq_rs74471209	35890804	G	-0.1355	0.04331	-0.2204	-0.05062	-3.129	0.001881		1	GSA-rs12092254	1113121	A	ADD	0.1344	3.13	0.001874
12	GSA-rs7132971	106720355	A	-0.1308	0.0418	-0.2127	-0.04884	-3.128	0.001884		14	rs7150691	22730510	G	ADD	0.1334	3.13	0.001876
16	rs33998047	87676995	G	-0.1329	0.04249	-0.2162	-0.04964	-3.128	0.001884		17	rs9896398	76503593	G	ADD	-0.1374	-3.129	0.001876
22	GSA-rs131056	47905322	A	0.1302	0.04163	0.04862	0.2118	3.128	0.001885		11	rs12419106	33716435	A	ADD	0.1352	3.129	0.001879
23	rs4433306	31772485	A	0.133	0.04251	0.04965	0.2163	3.128	0.001885		5	rs7724254	173424464	A	ADD	-0.1337	-3.129	0.00188
1	GSA-rs1832289	164041764	G	0.1321	0.04224	0.04934	0.2149	3.128	0.001886		22	rs855791	37462936	A	ADD	0.1325	3.129	0.001882
9	GSA-rs2150192	4487024	G	-0.1316	0.0421	-0.2141	-0.04913	-3.127	0.001891		9	GSA-rs79199260	132946644	G	ADD	-0.1323	-3.128	0.001888
12	rs6489004	126019054	A	-0.1311	0.04192	-0.2132	-0.04892	-3.127	0.001892		12	rs4766248	4537421	G	ADD	0.1328	3.127	0.001894
6	GSA-rs1503151	54671090	A	-0.1334	0.04267	-0.217	-0.04979	-3.127	0.001893		5	rs2398622	3678658	A	ADD	-0.136	-3.126	0.001896
2	rs13010862	79982927	G	-0.1314	0.04203	-0.2138	-0.04903	-3.126	0.001895		16	rs9940666	10357537	A	ADD	0.1339	3.126	0.001897
13	GSA-rs9595638	47854508	A	-0.1314	0.04202	-0.2137	-0.04901	-3.126	0.001897		6	rs509685	133517005	A	ADD	0.1354	3.126	0.001899
23	exm1659891	139038443	A	-0.139	0.04446	-0.2261	-0.05183	-3.126	0.001899		12	rs4556609	43057728	A	ADD	0.1325	3.126	0.001899
6	rs477515	32569691	A	-0.1306	0.04179	-0.2125	-0.04871	-3.125	0.001902		9	GSA-rs10511595	14730234	A	ADD	0.1325	3.125	0.001904
15	rs11630802	82241024	A	-0.1333	0.04264	-0.2168	-0.04969	-3.125	0.001902		4	rs12649785	37335699	C	ADD	-0.1337	-3.125	0.001906
3	rs3910485	107628176	G	0.1326	0.04242	0.04942	0.2157	3.125	0.001905		4	rs6553853	175936490	C	ADD	-0.1322	-3.124	0.001908
8	GSA-rs74701635	118758316	A	-0.1316	0.04212	-0.2142	-0.04905	-3.125	0.001907		15	rs1495271	101962723	A	ADD	0.1333	3.124	0.00191
7	rs17864092	126639604	G	0.1334	0.0427	0.04969	0.217	3.124	0.001913		4	rs1381252	73673070	A	ADD	-0.1325	-3.124	0.001913
11	rs3026398	31808775	A	0.1322	0.04234	0.04925	0.2152	3.123	0.001915		1	GSA-rs77857663	245957353	A	ADD	-0.1346	-3.123	0.001915
2	rs10179208	45242550	A	-0.1303	0.04173	-0.2121	-0.04849	-3.122	0.001924		15	IlmnSeq_rs1077834	58723479	A	ADD	0.14	3.123	0.001918
12	GSA-rs6539271	106857764	G	-0.1311	0.04198	-0.2133	-0.04877	-3.122	0.001926		15	rs1077834	58723479	A	ADD	0.14	3.123	0.001918
17	rs1378602	18111868	A	-0.1312	0.04204	-0.2136	-0.04883	-3.122	0.001926		15	IlmnSeq_rs2070895	58723939	G	ADD	0.14	3.123	0.001918
1	rs1516161	106011788	A	-0.1303	0.04174	-0.2121	-0.04847	-3.121	0.001928		15	rs2070895	58723939	G	ADD	0.14	3.123	0.001918
5	rs951482	117006071	C	0.1329	0.04258	0.04945	0.2163	3.121	0.001928		14	rs10162596	50394591	A	ADD	-0.1329	-3.123	0.001919
12	rs11061055	131134785	A	-0.1363	0.04367	-0.2219	-0.05072	-3.121	0.001928		2	rs7559393	67521740	A	ADD	0.1329	3.122	0.001925
2	GSA-rs9287761	13380032	C	0.1309	0.04196	0.04869	0.2132	3.12	0.001934		4	rs7688738	124426163	C	ADD	0.1325	3.121	0.001928
10	rs1342273	111973339	A	-0.1302	0.04173	-0.2119	-0.04837	-3.119	0.001941		19	JHU_19.45324137	45324138	A	ADD	-0.1348	-3.121	0.001932
6	chr6:29924831	29924831	G	0.1307	0.04191	0.04857	0.2128	3.119	0.001944		18	rs12955466	22869485	A	ADD	-0.1327	-3.12	0.001935
12	GSA-rs10783368	50923274	A	-0.1339	0.04292	-0.218	-0.04974	-3.119	0.001944		13	GSA-rs117730223	53820240	A	ADD	0.1333	3.12	0.001939
9	GSA-rs10987107	128783188	C	-0.1304	0.04181	-0.2124	-0.04845	-3.119	0.001945		4	GSA-rs116201056	90261336	G	ADD	-0.1322	-3.119	0.001945
6	GSA-rs1219036	94601357	G	-0.1337	0.04288	-0.2177	-0.04964	-3.118	0.001952		1	GSA-rs12097602	203025428	A	ADD	-0.1349	-3.118	0.00195
2	GSA-rs78141790	23213369	A	-0.1321	0.04238	-0.2151	-0.04903	-3.117	0.001955		7	rs6943172	151185255	A	ADD	0.1324	3.117	0.001958
3	rs9882140	13686178	A	0.1336	0.04288	0.0496	0.2177	3.117	0.001959		7	rs12668051	98400599	A	ADD	0.1331	3.116	0.001959
16	rs7405232	12937344	G	-0.1346	0.04318	-0.2192	-0.04994	-3.116	0.00196		3	rs17577554	76178771	C	ADD	0.1335	3.115	0.001967
14	rs7146371	71640689	A	-0.1313	0.04213	-0.2138	-0.0487	-3.116	0.001962		3	rs9829920	16801747	A	ADD	-0.1364	-3.115	0.001968
1	GSA-rs10796909	37981203	A	-0.1315	0.0422	-0.2142	-0.04878	-3.116	0.001963		13	rs17736683	76876138	A	ADD	0.1345	3.115	0.001969
2	rs7568419	177370519	A	0.1429	0.04585	0.053	0.2327	3.116	0.001963		5	GSA-rs9313444	168557833	A	ADD	0.1333	3.115	0.001971
2	GSA-rs12465294	127438392	A	0.1313	0.04215	0.04868	0.2139	3.115	0.001969		15	rs8041078	100269737	A	ADD	-0.1318	-3.114	0.001975
2	GSA-rs7563027	127438542	A	0.1313	0.04215	0.04868	0.2139	3.115	0.001969		10	GSA-rs4962374	128564322	A	ADD	0.1338	3.114	0.001976
8	rs921957	119107434	G	-0.1329	0.04267	-0.2165	-0.04927	-3.115	0.00197		1	rs75629896	160266632	C	ADD	-0.1318	-3.113	0.00198
12	rs80152969	64161929	A	-0.1337	0.04291	-0.2178	-0.04955	-3.115	0.001971		8	rs2614071	28165985	A	ADD	0.1328	3.113	0.001981
18	GSA-rs12185395	40510118	A	-0.1399	0.04492	-0.2279	-0.05184	-3.114	0.001974		9	GSA-rs10816986	113117556	A	ADD	-0.134	-3.113	0.001984
10	rs12571370	11940540	A	0.1306	0.04194	0.0484	0.2128	3.114	0.001975		15	rs1077835	58723426	A	ADD	0.1395	3.113	0.001984
12	rs11105381	90106835	A	-0.1302	0.04181	-0.2122	-0.04826	-3.114	0.001975		12	rs300470	78470268	G	ADD	0.1321	3.113	0.001985
3	rs9830035	171540177	A	-0.1329	0.04269	-0.2166	-0.04925	-3.114	0.001977		5	GSA-rs454273	116851961	A	ADD	0.1323	3.111	0.001997
3	rs3772339	1293504	A	-0.1319	0.04235	-0.2149	-0.04885	-3.113	0.001979		3	rs11128227	71962742	A	ADD	0.132	3.11	0.001999
17	GSA-rs13341521	27763242	G	-0.1313	0.04216	-0.2139	-0.04863	-3.113	0.00198		8	GSA-rs4734305	96344427	A	ADD	0.133	3.11	0.002003
1	rs983034	68603586	A	0.1298	0.04171	0.04808	0.2116	3.113	0.001983		16	rs16943271	87803148	A	ADD	0.132	3.11	0.002004
12	rs7976328	95309507	A	-0.1331	0.04279	-0.217	-0.04927	-3.111	0.001993		23	rs910618	145367055	A	ADD	0.1371	3.11	0.002004
10	rs3780852	29789454	A	-0.1302	0.04186	-0.2123	-0.04818	-3.111	0.001995		4	rs967099	114118650	G	ADD	0.1343	3.109	0.00201
4	rs1201204	151776717	G	-0.1321	0.04248	-0.2154	-0.04886	-3.11	0.002001		4	GSA-rs1991839	124745047	C	ADD	-0.1328	-3.108	0.002017
6	rs9478812	151095379	A	-0.1321	0.04248	-0.2154	-0.04886	-3.11	0.002001		13	GSA-rs117357821	43889800	G	ADD	0.134	3.108	0.002017
1	GSA-rs4434807	73401801	A	0.1319	0.04242	0.04877	0.2151	3.11	0.002004		13	IlmnSeq_rs1002164	97323933	A	ADD	-0.1317	-3.106	0.002028
2	rs1898537	216377226	A	0.1319	0.04241	0.04874	0.215	3.109	0.002009		13	GSA-rs1002164	97323933	A	ADD	-0.1317	-3.106	0.002028
11	GSA-rs11034021	37222358	G	-0.1312	0.04222	-0.214	-0.0485	-3.109	0.002009		11	GSA-rs75998564	96923058	A	ADD	-0.1334	-3.106	0.002029
6	GSA-rs7762658	138363064	A	-0.1329	0.04275	-0.2167	-0.04911	-3.109	0.00201		23	JHU_X.35061500	35061501	A	ADD	0.135	3.106	0.002029
1	rs12140392	188154257	A	-0.1295	0.04165	-0.2111	-0.04783	-3.108	0.002012		6	rs75155807	11361888	G	ADD	0.1317	3.106	0.00203
12	GSA-rs7958385	131943291	G	-0.1302	0.04188	-0.2122	-0.04808	-3.108	0.002014		6	rs9342219	90756453	A	ADD	0.1321	3.106	0.002031
5	GSA-rs1445675	151385578	G	0.1313	0.04224	0.04849	0.2141	3.108	0.002015		1	rs599367	20434402	G	ADD	-0.1323	-3.105	0.002038
10	rs34970111	106078937	A	-0.1316	0.04234	-0.2146	-0.04862	-3.108	0.002016		15	rs8035858	93158631	G	ADD	0.1348	3.104	0.002038
11	rs752979	120608964	A	-0.1325	0.04265	-0.2161	-0.04894	-3.108	0.002018		1	rs12124645	77412583	A	ADD	0.1329	3.104	0.002042
12	rs113777878	133525460	C	0.1325	0.04265	0.04894	0.2161	3.108	0.002019		18	GSA-rs55641647	30014430	G	ADD	0.1332	3.104	0.002044
3	rs267526	37516136	A	0.1342	0.04318	0.04953	0.2188	3.107	0.002022		6	rs9376219	136963890	A	ADD	0.1324	3.103	0.002045
1	GSA-rs6688345	156876206	A	-0.13	0.04186	-0.212	-0.04796	-3.106	0.002029		1	rs6663292	111904494	G	ADD	-0.135	-3.103	0.002051
20	rs2618550	17868814	G	0.1311	0.04219	0.04836	0.2137	3.106	0.002029		2	rs7602661	45506205	G	ADD	0.1319	3.102	0.002055
9	GSA-rs1446268	12098000	G	0.1315	0.04235	0.04852	0.2145	3.106	0.002031		20	rs238148	47850182	G	ADD	-0.1342	-3.102	0.002057
2	rs908641	127432998	A	0.131	0.0422	0.0483	0.2137	3.105	0.002036		20	rs6066892	36202348	A	ADD	0.1362	3.101	0.002059
6	rs1508355	106326339	G	0.1311	0.04225	0.04832	0.2139	3.104	0.002042		5	rs113809624	173435841	G	ADD	-0.1326	-3.101	0.002064
9	GSA-rs4385545	85601796	C	0.1302	0.04195	0.04798	0.2124	3.104	0.002043		1	rs2745251	21674005	G	ADD	-0.1313	-3.101	0.002065
7	GSA-rs11769769	128312450	A	-0.1338	0.04314	-0.2183	-0.04924	-3.101	0.002059		1	GSA-rs630895	55281991	G	ADD	-0.1318	-3.1	0.002068
2	rs4312465	35732687	G	-0.1313	0.04235	-0.2143	-0.04832	-3.101	0.002062		11	rs1995158	5566030	A	ADD	0.1313	3.1	0.002068
17	rs411988	56709034	A	-0.1359	0.04384	-0.2219	-0.05	-3.1	0.002068		7	GSA-rs59558034	151403264	G	ADD	0.1317	3.099	0.002075
6	rs35445101	32546879	G	-0.1298	0.04187	-0.2119	-0.04773	-3.1	0.002071		10	rs10904398	562805	G	ADD	-0.1362	-3.099	0.002076
22	rs8135992	50073254	G	0.1297	0.04185	0.04768	0.2117	3.099	0.002073		8	rs13255145	76120341	A	ADD	0.1336	3.099	0.002078
7	rs11980132	156722649	A	-0.1304	0.04207	-0.2128	-0.04792	-3.099	0.002075		2	rs72782173	21348958	G	ADD	0.1337	3.098	0.002081
6	rs561355	133576444	G	-0.1295	0.04178	-0.2114	-0.04758	-3.099	0.002078		12	GSA-rs4930998	32060269	A	ADD	-0.1362	-3.096	0.002096
9	rs7861820	108936674	G	-0.1299	0.04194	-0.2121	-0.04775	-3.099	0.002078		16	IlmnSeq_rs12600154	79109753	C	ADD	-0.1312	-3.096	0.002097
9	GSA-rs2987380	134703398	G	-0.1307	0.04219	-0.2134	-0.04805	-3.099	0.002078		23	rs6640674	4597763	G	ADD	0.139	3.096	0.0021
22	rs6008817	46814671	A	-0.1356	0.04377	-0.2214	-0.04982	-3.098	0.002081		12	rs258394	28004886	G	ADD	0.1337	3.095	0.002105
2	IlmnSeq_rs1427150	185480633	G	0.1319	0.04257	0.04844	0.2153	3.098	0.002083		21	GSA-rs2836891	40489027	G	ADD	-0.1316	-3.094	0.002107
2	GSA-rs76870839	237822978	C	0.1302	0.04202	0.04781	0.2125	3.098	0.002084		2	rs73925160	30631507	A	ADD	-0.1344	-3.093	0.002114
12	GSA-rs74239936	50918482	A	-0.1331	0.04296	-0.2173	-0.04887	-3.098	0.002085		4	GSA-rs79987929	124463893	G	ADD	-0.131	-3.093	0.002114
2	GSA-rs2136474	231864289	C	-0.1297	0.04188	-0.2118	-0.04763	-3.097	0.002088		18	rs17710295	28116070	A	ADD	-0.1344	-3.093	0.002116
3	rs6792708	131899812	A	0.1321	0.04266	0.0485	0.2157	3.097	0.002089		5	rs10069027	118045916	A	ADD	0.1315	3.092	0.002124
9	GSA-rs1360329	4489494	A	0.1293	0.04175	0.04747	0.2111	3.097	0.00209		10	rs17449616	8216423	G	ADD	0.1321	3.091	0.002133
7	GSA-rs80245945	36145123	A	-0.1307	0.04221	-0.2134	-0.04797	-3.097	0.002092		5	rs77055707	135299759	G	ADD	0.1316	3.09	0.002135
3	rs12695630	93923642	A	0.1301	0.04202	0.04775	0.2124	3.096	0.002094		12	GSA-rs11177372	69179929	G	ADD	0.1343	3.089	0.002143
12	GSA-rs7132103	5456976	G	0.1294	0.04181	0.0475	0.2114	3.096	0.002095		18	rs7242015	11030195	G	ADD	-0.1309	-3.089	0.002148
13	rs7337254	42095718	G	0.1321	0.04266	0.04844	0.2157	3.095	0.002101		9	GSA-rs4740573	14464090	C	ADD	0.132	3.088	0.002154
2	GSA-rs17014131	127435986	A	0.1305	0.04217	0.04785	0.2131	3.095	0.002105		5	GSA-rs73140211	82625172	A	ADD	0.1311	3.086	0.002164
2	GSA-rs17014134	127436130	A	0.1305	0.04217	0.04785	0.2131	3.095	0.002105		7	rs4452696	65286712	A	ADD	0.1325	3.087	0.002165
2	GSA-rs4143021	127436724	A	0.1305	0.04217	0.04785	0.2131	3.095	0.002105		1	rs72662666	26076574	A	ADD	0.1319	3.086	0.00217
16	rs73512663	12983382	A	0.1358	0.04389	0.04978	0.2218	3.094	0.002109		10	rs75509222	5393086	C	ADD	0.1315	3.085	0.002173
3	rs12635360	6832712	C	-0.129	0.0417	-0.2108	-0.04729	-3.094	0.00211		6	rs9395653	51006546	A	ADD	-0.1319	-3.085	0.002175
8	rs114787132	55998310	A	-0.1333	0.0431	-0.2178	-0.04885	-3.093	0.002115		18	rs1652377	21113551	G	ADD	-0.1306	-3.085	0.002176
23	rs1936035	51316259	G	-0.1318	0.04262	-0.2154	-0.04831	-3.093	0.002116		8	rs7838656	134490849	G	ADD	-0.132	-3.084	0.002183
12	rs7954746	5466428	A	0.1293	0.04182	0.04737	0.2113	3.093	0.00212		14	rs10444766	28467299	A	ADD	0.1312	3.084	0.002184
3	IlmnSeq_rs12635360	6832712	C	-0.1293	0.04182	-0.2113	-0.04736	-3.092	0.002122		3	GSA-rs6445846	57076196	A	ADD	-0.1313	-3.083	0.002187
13	rs2407795	50195882	A	0.1313	0.04248	0.04809	0.2146	3.092	0.002124		20	rs45461302	43805274	A	ADD	0.1322	3.082	0.002194
6	rs12660860	30764241	A	0.1317	0.0426	0.04817	0.2151	3.091	0.002131		20	rs913664	55382086	G	ADD	-0.1368	-3.082	0.002195
5	rs2400293	146695681	C	0.1306	0.04226	0.0478	0.2134	3.091	0.002133		3	rs6441028	155624605	G	ADD	-0.1313	-3.082	0.002198
2	IlmnSeq_rs17603277	158972966	G	-0.1297	0.04197	-0.2119	-0.04741	-3.09	0.002139		8	GSA-rs80348801	115111284	A	ADD	0.1312	3.082	0.002198
2	rs17603277	158972966	G	-0.1297	0.04197	-0.2119	-0.04741	-3.09	0.002139		23	rs1883666	85971578	A	ADD	0.1372	3.081	0.002201
8	rs79782213	84288131	G	-0.1301	0.0421	-0.2126	-0.04757	-3.09	0.002139		2	IlmnSeq_rs12464177	133627136	A	ADD	-0.1341	-3.08	0.002206
6	rs2516697	30232514	A	-0.1304	0.04221	-0.2131	-0.04767	-3.09	0.002141		19	rs28696267	13504704	G	ADD	-0.1353	-3.081	0.002207
13	rs6561366	47862887	C	-0.1297	0.04197	-0.2119	-0.0474	-3.089	0.002144		12	GSA-rs16944623	115190712	A	ADD	0.1311	3.08	0.002208
7	rs10486722	41811908	A	-0.1311	0.04245	-0.2143	-0.04792	-3.089	0.002145		7	rs7798144	22147562	A	ADD	-0.1317	-3.08	0.002213
5	IlmnSeq_rs16898820	10751565	A	-0.1304	0.04221	-0.2131	-0.04764	-3.089	0.002147		12	GSA-rs11612209	10869062	G	ADD	-0.1308	-3.079	0.002216
5	rs16898820	10751565	A	-0.1304	0.04221	-0.2131	-0.04764	-3.089	0.002147		20	GSA-rs6034072	14945547	G	ADD	0.1317	3.079	0.002216
7	rs2539828	106055220	G	-0.1324	0.04286	-0.2164	-0.04838	-3.089	0.002147		19	rs58656993	50398078	A	ADD	0.1316	3.079	0.002217
9	rs12342831	33124872	G	0.1344	0.04351	0.0491	0.2197	3.089	0.002148		4	IlmnSeq_rs1907155	155361244	C	ADD	-0.1307	-3.079	0.00222
9	rs3780486	33139453	A	0.1344	0.04351	0.0491	0.2197	3.089	0.002148		4	rs1907155	155361244	C	ADD	-0.1307	-3.079	0.00222
7	rs6978859	114381202	A	-0.1307	0.04231	-0.2136	-0.04774	-3.088	0.002151		12	rs2046383	30104142	C	ADD	0.1322	3.079	0.00222
1	GSA-rs773554	113830085	A	-0.1306	0.0423	-0.2136	-0.04772	-3.088	0.002153		11	GSA-rs16935476	18509993	A	ADD	-0.1316	-3.078	0.002221
6	rs4708866	158022745	G	-0.1293	0.04188	-0.2114	-0.04722	-3.088	0.002155		15	rs7162001	48171556	G	ADD	0.1311	3.078	0.002226
6	GSA-rs2157460	130021128	G	0.1294	0.04192	0.04723	0.2115	3.087	0.002161		18	GSA-rs80217053	5842444	A	ADD	0.1315	3.078	0.002226
2	rs1559603	67067669	G	-0.1293	0.04191	-0.2115	-0.04721	-3.086	0.002163		16	rs62029833	48983974	A	ADD	-0.1333	-3.077	0.002229
6	rs625204	35969768	A	0.1296	0.04198	0.04727	0.2118	3.086	0.002167		22	rs5751194	42379813	G	ADD	-0.1311	-3.077	0.002229
7	GSA-rs78413068	157606333	A	-0.1291	0.04183	-0.2111	-0.0471	-3.086	0.002167		4	rs61121312	101413041	C	ADD	-0.132	-3.076	0.002239
3	rs2929859	128608341	C	-0.1291	0.04184	-0.2111	-0.0471	-3.086	0.002168		19	rs754340	45163671	G	ADD	-0.1317	-3.076	0.002241
11	rs4520	116701535	G	-0.1326	0.04299	-0.2169	-0.04838	-3.085	0.002171		20	rs6077046	6646414	A	ADD	-0.131	-3.075	0.002243
7	rs75607577	9342843	A	0.1287	0.04175	0.04692	0.2106	3.084	0.002181		16	rs1003904	1996075	A	ADD	0.1322	3.075	0.002245
14	rs11847405	97165610	A	0.1292	0.04191	0.04711	0.2114	3.084	0.002181		23	rs4829149	34449197	A	ADD	-0.1315	-3.075	0.002247
23	rs2092153	141023362	G	0.1347	0.04367	0.04909	0.2203	3.084	0.002181		1	rs967392	201623215	C	ADD	-0.1339	-3.074	0.002251
5	exm2264151	116968077	A	0.1341	0.04348	0.04887	0.2193	3.084	0.002182		5	rs1528961	136793148	A	ADD	-0.1305	-3.074	0.002252
19	rs797544	5479522	C	0.1295	0.04199	0.04719	0.2118	3.084	0.002182		9	GSA-rs7021243	8692722	A	ADD	0.1311	3.073	0.002258
12	rs726943	107331647	G	0.1285	0.04167	0.0468	0.2101	3.083	0.002187		12	rs12824715	21056715	A	ADD	0.1313	3.073	0.002263
4	IlmnSeq_rs10015891	46957305	A	-0.1334	0.04328	-0.2183	-0.0486	-3.083	0.002188		6	rs59733760	5982157	A	ADD	0.13	3.071	0.002272
3	IlmnSeq_rs17586083	2932614	A	0.1302	0.04222	0.04741	0.2129	3.083	0.002189		14	rs1256031	64746179	A	ADD	-0.1309	-3.071	0.002277
11	IlmnSeq_rs163171	2821065	A	-0.1295	0.04203	-0.2119	-0.04715	-3.082	0.002197		23	exm1649561	100532621	G	ADD	-0.132	-3.071	0.002277
11	rs163171	2821065	A	-0.1295	0.04203	-0.2119	-0.04715	-3.082	0.002197		1	rs2811946	23902416	C	ADD	0.1321	3.07	0.00228
16	GSA-rs9929761	21244113	A	-0.129	0.04187	-0.2111	-0.04693	-3.081	0.002204		14	rs4460991	58016857	G	ADD	-0.1304	-3.07	0.002281
15	rs9630453	89403922	G	-0.1301	0.04223	-0.2128	-0.0473	-3.08	0.002209		17	IlmnSeq_rs2072333	19559371	A	ADD	0.131	3.069	0.002288
5	GSA-rs2431744	173584572	A	-0.1292	0.04196	-0.2115	-0.04698	-3.08	0.002213		3	GSA-rs16859665	184845544	G	ADD	0.1308	3.069	0.002289
20	rs6100296	57532430	A	0.1304	0.04234	0.0474	0.2134	3.079	0.002216		15	GSA-rs113360349	70113197	G	ADD	-0.1316	-3.069	0.002292
3	rs6790948	13695824	G	-0.1299	0.0422	-0.2126	-0.04722	-3.079	0.002217		4	rs1489443	131620213	G	ADD	-0.1316	-3.069	0.002294
15	rs11634085	97535118	A	-0.1309	0.04251	-0.2142	-0.04757	-3.079	0.002217		11	rs965716	80235447	G	ADD	0.1313	3.069	0.002294
18	rs35219613	56999477	G	-0.1318	0.04283	-0.2158	-0.04789	-3.078	0.002223		19	rs17777712	13472583	G	ADD	-0.1315	-3.068	0.002298
5	rs3792727	19484182	A	-0.1315	0.04273	-0.2153	-0.04777	-3.078	0.002224		12	rs4301826	52560231	C	ADD	0.1313	3.068	0.0023
8	rs13252630	15832617	A	0.1297	0.04213	0.0471	0.2122	3.078	0.002224		6	GSA-rs4716374	170064196	C	ADD	0.1357	3.067	0.002304
3	GSA-rs1920379	115818840	G	0.1308	0.04251	0.04751	0.2141	3.078	0.002226		9	GSA-rs6145	2651962	A	ADD	-0.1307	-3.067	0.002304
14	rs1548770	74686558	G	-0.1288	0.04185	-0.2108	-0.04678	-3.078	0.002226		6	rs9276427	32711857	A	ADD	-0.1317	-3.067	0.002306
4	rs16859407	46455805	G	-0.1303	0.04235	-0.2134	-0.04733	-3.077	0.002229		12	rs17224336	47812267	G	ADD	0.1333	3.067	0.002308
17	rs6503078	7996640	A	0.1312	0.04264	0.04762	0.2148	3.077	0.002232		7	rs6950458	86885682	A	ADD	-0.1318	-3.066	0.002312
19	rs514328	44280837	G	-0.1294	0.04207	-0.2119	-0.04698	-3.077	0.002234		16	rs78197430	82677795	A	ADD	0.1318	3.066	0.002314
4	rs13434489	177907949	A	0.1291	0.04197	0.04686	0.2114	3.077	0.002235		7	rs10265626	147175188	A	ADD	-0.1322	-3.066	0.002315
7	rs10282109	15699816	C	-0.1283	0.04171	-0.21	-0.04656	-3.076	0.002237		23	rs10126922	115085287	A	ADD	-0.1301	-3.065	0.002318
23	rs2092286	142568865	G	0.1322	0.04297	0.04793	0.2164	3.075	0.002243		1	GSA-rs526985	87316418	A	ADD	0.1313	3.065	0.002319
2	rs1427150	185480633	G	0.1309	0.04256	0.04747	0.2143	3.075	0.002244		16	rs74249106	3379136	A	ADD	-0.1312	-3.065	0.002319
15	rs1387386	63211875	A	-0.1281	0.04167	-0.2098	-0.04647	-3.075	0.002244		2	rs4663655	237468542	G	ADD	-0.1308	-3.065	0.00232
6	rs1362116	30373043	A	0.1283	0.04173	0.04649	0.21	3.074	0.002253		16	GSA-rs28508430	25955399	A	ADD	-0.1321	-3.065	0.002321
2	IlmnSeq_rs10165970	101456989	A	0.1317	0.04284	0.04772	0.2157	3.074	0.002255		15	IlmnSeq_rs6576602	26982080	A	ADD	0.132	3.064	0.002325
2	rs10165970	101456989	A	0.1317	0.04284	0.04772	0.2157	3.074	0.002255		15	rs6576602	26982080	A	ADD	0.132	3.064	0.002325
3	rs12495328	13717252	A	0.1293	0.04209	0.04684	0.2118	3.073	0.002262		14	rs10138605	101135965	G	ADD	-0.1346	-3.064	0.002327
1	rs4375210	80659876	G	0.1343	0.04371	0.04863	0.22	3.073	0.002263		13	GSA-rs9513984	102775675	A	ADD	0.1303	3.063	0.002334
15	rs4778905	81821475	A	0.1286	0.04186	0.04658	0.2107	3.073	0.002263		17	rs936656	33433820	A	ADD	0.1324	3.062	0.00234
17	rs2435974	70714958	G	-0.1299	0.04228	-0.2128	-0.04703	-3.072	0.002265		18	rs11877669	46314384	C	ADD	-0.1298	-3.062	0.002341
20	rs9789802	59407697	G	-0.129	0.04198	-0.2112	-0.04669	-3.072	0.002267		2	rs67804962	445972	A	ADD	-0.1312	-3.062	0.002345
1	GSA-rs6660036	73390986	G	0.1303	0.04242	0.04717	0.2134	3.072	0.002269		1	rs7550297	156700845	A	ADD	0.1317	3.062	0.002347
6	rs9466410	22614730	G	0.1356	0.04416	0.04909	0.2222	3.072	0.002271		2	IlmnSeq_rs17501837	215901774	A	ADD	0.1306	3.061	0.002347
1	rs4657510	166027277	G	-0.1295	0.04215	-0.2121	-0.04684	-3.071	0.002275		6	rs9688767	83582258	A	ADD	-0.1341	-3.061	0.002347
1	rs7535476	153514241	C	-0.1281	0.04171	-0.2098	-0.04633	-3.071	0.002277		21	rs2834291	35269767	G	ADD	0.1312	3.061	0.002349
4	IlmnSeq_rs17466657	7730560	A	-0.1292	0.04209	-0.2118	-0.04675	-3.07	0.002279		11	rs1404796	112295421	G	ADD	-0.1319	-3.061	0.002351
10	rs753455	123494644	A	0.1346	0.04385	0.04867	0.2205	3.07	0.002284		16	GSA-rs698728	68625253	A	ADD	-0.13	-3.061	0.002353
6	GSA-rs9275555	32677088	A	-0.1285	0.04187	-0.2106	-0.04646	-3.069	0.002288		19	rs67923006	31308147	A	ADD	0.1298	3.061	0.002353
6	rs9275580	32679462	G	-0.1285	0.04187	-0.2106	-0.04646	-3.069	0.002288		3	rs7620503	177304298	A	ADD	0.1298	3.059	0.002365
6	rs9394952	43401105	A	0.1284	0.04184	0.04641	0.2104	3.069	0.002291		20	GSA-rs2664581	43804522	C	ADD	0.1313	3.059	0.002369
6	rs12660883	30764420	G	-0.1314	0.04281	-0.2153	-0.04746	-3.069	0.002294		1	rs72641084	12168091	A	ADD	-0.1304	-3.058	0.002371
23	rs5922444	86676845	A	-0.1335	0.04352	-0.2188	-0.04824	-3.068	0.002295		14	rs1951263	28913965	A	ADD	-0.1299	-3.058	0.002374
14	rs4982322	36454651	A	-0.1292	0.04212	-0.2118	-0.04667	-3.068	0.002299		10	rs11197616	84929207	A	ADD	-0.1308	-3.058	0.002376
21	rs9978920	21741859	C	-0.1286	0.04193	-0.2108	-0.04645	-3.068	0.002299		16	rs7499017	87191008	A	ADD	-0.1353	-3.058	0.002378
15	rs4774301	58801541	A	0.1288	0.04199	0.04652	0.2111	3.068	0.0023		12	rs4931403	31134302	A	ADD	0.1314	3.057	0.00238
4	GSA-rs4690351	177419908	A	-0.1285	0.04187	-0.2105	-0.04638	-3.068	0.002301		7	GSA-rs78783622	94407605	A	ADD	-0.1304	-3.057	0.002384
2	rs12615207	52999305	A	0.1286	0.04193	0.04642	0.2108	3.067	0.002304		7	rs2529244	101355402	A	ADD	0.1301	3.057	0.002385
6	rs7745656	32680970	A	0.1283	0.04182	0.04629	0.2102	3.067	0.002307		5	rs1828614	9536033	A	ADD	-0.1313	-3.056	0.002394
12	rs10861973	109271928	G	-0.1308	0.04265	-0.2144	-0.04722	-3.067	0.002307		2	rs243081	60613776	G	ADD	0.1336	3.055	0.002395
8	rs62502155	26984712	A	-0.1307	0.04261	-0.2142	-0.04714	-3.066	0.00231		12	rs2220704	129954540	G	ADD	-0.1311	-3.055	0.002401
4	rs17011033	127309605	G	-0.129	0.04208	-0.2115	-0.04655	-3.066	0.002313		4	GSA-rs316424	73651309	A	ADD	-0.1297	-3.054	0.002404
7	GSA-rs114610365	131267426	A	0.1308	0.04268	0.04717	0.2145	3.065	0.002318		6	GSA-rs78578366	147704829	A	ADD	-0.1316	-3.054	0.002407
7	rs1204556	126584795	G	0.1293	0.04219	0.04662	0.212	3.065	0.00232		23	rs5950910	43392291	A	ADD	-0.1302	-3.054	0.002409
17	IlmnSeq_rs2020936	28550814	G	-0.1285	0.04192	-0.2106	-0.04628	-3.064	0.002329		2	GSA-rs1665272	61379286	A	ADD	-0.1293	-3.053	0.002412
6	GSA-rs78578366	147704829	A	-0.13	0.04243	-0.2131	-0.04682	-3.063	0.002333		20	rs6041084	12069732	G	ADD	0.1333	3.053	0.002412
2	rs6434514	192716848	C	-0.1288	0.04203	-0.2111	-0.04637	-3.063	0.002336		7	rs714510	128031298	A	ADD	0.132	3.053	0.002413
11	IlmnSeq_rs2237895	2857194	C	0.1279	0.04177	0.04607	0.2098	3.063	0.002336		18	GSA-rs4129315	22683434	G	ADD	-0.1294	-3.053	0.002414
11	rs2237895	2857194	C	0.1279	0.04177	0.04607	0.2098	3.063	0.002336		15	rs261334	58726744	C	ADD	0.1376	3.053	0.002416
5	rs4912636	141637058	A	0.1318	0.04306	0.04746	0.2162	3.062	0.002342		6	rs9494921	138348497	G	ADD	-0.13	-3.053	0.002417
7	GSA-rs2868895	77768217	G	0.129	0.04213	0.0464	0.2116	3.061	0.002349		2	rs790044	233310149	A	ADD	0.1296	3.052	0.002418
6	rs4714684	43396856	C	0.1281	0.04186	0.04608	0.2102	3.061	0.002353		10	rs10904588	991737	G	ADD	-0.1299	-3.052	0.00242
1	IlmnSeq_rs76175742	166543769	A	0.1355	0.04426	0.04872	0.2222	3.061	0.002354		6	IlmnSeq_rs2277122	43406501	A	ADD	-0.13	-3.052	0.002421
22	GSA-rs62226145	44285428	A	0.1281	0.04186	0.04608	0.2102	3.061	0.002354		17	rs3921965	72031792	G	ADD	-0.1303	-3.052	0.002423
20	rs2426480	51878763	G	-0.1307	0.04272	-0.2144	-0.04696	-3.059	0.002367		5	exm2261819	124361588	G	ADD	0.1335	3.052	0.002424
1	rs784600	40139553	G	0.1302	0.04257	0.04676	0.2136	3.059	0.00237		5	GSA-rs11749188	167234251	C	ADD	0.1343	3.052	0.002424
3	GSA-rs114820930	115328862	G	-0.1309	0.0428	-0.2148	-0.04701	-3.059	0.00237		5	rs2648804	10583537	A	ADD	0.1313	3.051	0.002426
5	GSA-rs580641	4041154	A	-0.1274	0.04166	-0.2091	-0.04577	-3.058	0.002371		8	rs2237813	28585452	A	ADD	-0.1303	-3.051	0.002433
14	rs17097879	31895974	A	0.1286	0.04205	0.04619	0.211	3.058	0.002371		7	rs657664	129146415	C	ADD	-0.1298	-3.05	0.002435
2	rs141316160	16263528	A	0.1279	0.04181	0.04592	0.2098	3.058	0.002372		6	rs7738980	134780275	A	ADD	0.1371	3.05	0.002436
6	rs439303	32208921	A	-0.1282	0.04192	-0.2103	-0.04602	-3.058	0.002375		18	GSA-rs17744022	30016917	A	ADD	0.1307	3.05	0.002438
20	rs2745835	17807984	A	-0.1276	0.04174	-0.2094	-0.04579	-3.057	0.002383		1	rs6682502	234866398	C	ADD	-0.1298	-3.05	0.002441
20	rs4812712	42104939	A	0.1339	0.04381	0.04805	0.2198	3.057	0.002384		12	rs10744620	3739094	A	ADD	-0.1302	-3.049	0.002444
4	GSA-rs41525649	94549401	A	-0.1289	0.04218	-0.2116	-0.04625	-3.056	0.002387		18	rs4503883	6446269	A	ADD	-0.1327	-3.049	0.002444
6	rs211432	133610598	A	-0.1283	0.04198	-0.2106	-0.04603	-3.057	0.002387		5	GSA-rs172944	170136830	G	ADD	0.1296	3.049	0.002446
14	GSA-rs4901602	56271006	A	0.1284	0.04203	0.04604	0.2108	3.055	0.002395		9	GSA-rs4978040	26078764	G	ADD	0.1303	3.049	0.002446
13	GSA-rs1105450	90975698	A	-0.1296	0.04242	-0.2127	-0.04646	-3.055	0.002396		7	rs6976113	109288483	A	ADD	0.1301	3.049	0.002449
7	rs11973244	158075769	G	0.1324	0.04336	0.04744	0.2174	3.054	0.002406		2	rs2075117	210843383	G	ADD	0.1308	3.048	0.00245
8	rs2514730	119146587	G	-0.1279	0.04187	-0.2099	-0.04579	-3.054	0.002408		1	GSA-rs985964	80870449	G	ADD	0.1337	3.048	0.002454
12	rs1909154	30153844	G	0.1301	0.04262	0.04661	0.2137	3.054	0.002409		3	rs73152850	143377890	A	ADD	0.1295	3.048	0.002454
1	rs2501312	159808286	A	-0.1295	0.04241	-0.2126	-0.04638	-3.053	0.002411		19	rs10426047	11760823	G	ADD	-0.1312	-3.047	0.002459
1	rs10927165	244382448	G	0.1294	0.04239	0.04633	0.2125	3.053	0.002415		4	rs929958	37769060	A	ADD	0.1296	3.047	0.00246
14	rs6572347	22736111	G	0.1282	0.04202	0.0459	0.2106	3.052	0.002419		9	GSA-rs12380373	21795661	G	ADD	-0.1308	-3.047	0.00246
6	rs302992	25062826	A	-0.1283	0.04206	-0.2107	-0.04588	-3.051	0.002429		12	GSA-rs11170099	52751117	A	ADD	0.1298	3.047	0.00246
5	rs6864886	124714338	A	0.1299	0.04259	0.04644	0.2134	3.05	0.002434		23	rs1023435	152207464	G	ADD	0.1322	3.047	0.002464
6	rs28670020	30764838	A	-0.1301	0.04266	-0.2137	-0.04649	-3.05	0.002438		20	rs238209	47865509	G	ADD	-0.1318	-3.047	0.002465
8	rs12545377	4319850	A	-0.1318	0.04323	-0.2165	-0.04707	-3.049	0.002447		6	rs3863222	6274084	G	ADD	-0.1296	-3.046	0.002471
6	rs10946675	24141920	A	0.1279	0.04196	0.04564	0.2101	3.048	0.002456		8	rs11775610	3183640	A	ADD	0.1295	3.045	0.002475
6	rs63118462	40524492	A	0.1289	0.04231	0.04599	0.2118	3.047	0.002462		9	GSA-rs7042042	32451144	A	ADD	-0.1295	-3.045	0.002475
5	rs261537	138933151	C	0.1337	0.04389	0.04769	0.2197	3.047	0.002463		8	rs12056519	25572870	A	ADD	-0.1308	-3.045	0.002477
11	IlmnSeq_rs234852	2850782	A	-0.128	0.04202	-0.2104	-0.04566	-3.047	0.002464		13	rs3736408	90129913	G	ADD	0.13	3.044	0.002484
11	GSA-rs234852	2850782	A	-0.128	0.04202	-0.2104	-0.04566	-3.047	0.002464		1	rs12739026	38401933	C	ADD	0.13	3.044	0.002489
1	rs1931074	56860216	G	-0.1273	0.04178	-0.2091	-0.04538	-3.046	0.002468		4	rs7356490	39486930	A	ADD	0.1305	3.043	0.002492
3	GSA-rs13066413	29230299	G	0.13	0.04268	0.04633	0.2136	3.045	0.002473		16	GSA-rs78123161	63865978	C	ADD	-0.1292	-3.043	0.002494
9	GSA-rs9969851	12054659	A	0.1332	0.04373	0.04748	0.2189	3.046	0.002473		2	rs1877954	85654299	A	ADD	-0.1289	-3.043	0.002495
15	rs2899499	53029343	G	-0.129	0.04237	-0.2121	-0.04599	-3.045	0.002476		2	rs6754120	340363	G	ADD	-0.1299	-3.043	0.002496
20	GSA-rs75655285	14596677	A	0.1273	0.04183	0.04535	0.2093	3.044	0.002484		9	GSA-rs7860632	21683289	A	ADD	-0.1312	-3.042	0.002499
2	rs56057672	195974463	C	0.1296	0.04257	0.04614	0.213	3.044	0.002488		5	rs1501935	75506650	A	ADD	-0.1308	-3.042	0.002501
5	rs10050720	72023208	A	0.1269	0.04173	0.04515	0.2087	3.042	0.002502		16	rs7193224	27958125	A	ADD	-0.1299	-3.042	0.002505
6	rs11965101	57665572	G	-0.1271	0.0418	-0.2091	-0.04522	-3.042	0.002502		23	JHU_X.38080702	38080703	A	ADD	-0.1367	-3.04	0.002515
9	GSA-rs10125005	71702636	G	0.1285	0.04227	0.0457	0.2114	3.041	0.002507		5	rs71586055	124618184	G	ADD	0.1305	3.04	0.002516
1	rs6687397	59526466	A	-0.1278	0.04201	-0.2101	-0.04542	-3.041	0.002508		5	GSA-rs80007900	82625291	A	ADD	0.13	3.04	0.002518
14	rs762039	21234851	C	0.1273	0.04187	0.04524	0.2094	3.04	0.002514		5	GSA-rs7711236	3675933	C	ADD	-0.1339	-3.04	0.002519
11	rs2273549	33079580	G	0.129	0.04244	0.04582	0.2122	3.04	0.00252		15	IlmnSeq_rs4243105	27471182	G	ADD	-0.1305	-3.039	0.002522
2	rs4669330	8826750	A	0.1284	0.04226	0.04562	0.2113	3.04	0.002522		15	rs4243105	27471182	G	ADD	-0.1305	-3.039	0.002522
2	rs17018644	36570374	G	-0.1276	0.04198	-0.2099	-0.04532	-3.04	0.002522		5	rs7341139	173472820	A	ADD	-0.1299	-3.039	0.002524
11	rs7943404	102598575	G	0.1274	0.04193	0.04525	0.2096	3.039	0.002523		14	rs1108613	20848963	A	ADD	-0.1297	-3.039	0.00253
6	GSA-rs851859	67054961	A	0.1275	0.04195	0.04524	0.2097	3.038	0.002531		10	rs12248244	70998111	G	ADD	0.1292	3.038	0.002531
3	rs1385469	8390226	A	-0.128	0.04215	-0.2107	-0.04544	-3.038	0.002534		19	rs61686231	17232245	G	ADD	0.1296	3.037	0.002546
21	rs67165434	21000937	C	0.1292	0.04252	0.04583	0.2125	3.038	0.002535		5	rs173765	9712069	G	ADD	-0.1314	-3.037	0.002547
17	GSA-rs11655000	27767343	A	-0.1276	0.04202	-0.21	-0.04529	-3.038	0.002536		4	rs200785587	18991459	C	ADD	0.1318	3.037	0.002548
5	rs11949302	126282246	G	0.1306	0.04301	0.04633	0.2149	3.037	0.002541		3	rs2664073	9149099	A	ADD	-0.1295	-3.036	0.002552
1	rs4604691	113199088	G	-0.1291	0.0425	-0.2124	-0.04576	-3.037	0.002545		3	rs1156909	28126595	A	ADD	0.1292	3.035	0.002556
6	rs12529724	91534091	A	-0.1275	0.04199	-0.2098	-0.04519	-3.036	0.002548		23	rs5982606	2813287	G	ADD	0.1305	3.035	0.002556
8	GSA-rs11782944	131540586	A	0.1296	0.04269	0.04594	0.2133	3.036	0.002551		10	rs10450284	68102333	C	ADD	0.1324	3.035	0.002557
8	GSA-rs1473603	66302199	A	-0.1273	0.04194	-0.2095	-0.04512	-3.036	0.002553		20	rs68083603	9281936	A	ADD	-0.1293	-3.034	0.002563
1	rs9431930	231249323	G	0.1273	0.04195	0.04512	0.2095	3.036	0.002554		2	IlmnSeq_rs16826351	134303747	A	ADD	0.1298	3.034	0.002564
7	rs6976725	137380919	A	0.1272	0.04192	0.04508	0.2094	3.036	0.002554		4	rs764275	106016627	C	ADD	-0.1309	-3.034	0.002569
10	GSA-rs77405289	50814006	G	-0.128	0.04218	-0.2107	-0.04535	-3.035	0.002558		13	GSA-rs2874620	34615587	C	ADD	0.1285	3.033	0.002572
7	GSA-rs6463117	42534499	G	0.1268	0.04177	0.04491	0.2087	3.035	0.002559		4	rs10866165	66712131	A	ADD	-0.1289	-3.033	0.002575
6	rs13193426	92877508	A	-0.1308	0.04312	-0.2153	-0.04633	-3.034	0.002564		4	rs1882331	185123766	G	ADD	-0.13	-3.033	0.002575
12	rs17124205	50365997	G	-0.1306	0.04306	-0.215	-0.04626	-3.034	0.002565		2	rs72825780	99330221	A	ADD	-0.1308	-3.033	0.002576
6	rs6913021	92229590	C	-0.1281	0.04223	-0.2109	-0.04537	-3.034	0.002567		4	rs78272916	10286838	G	ADD	-0.1295	-3.033	0.002578
1	GSA-rs11209943	72750500	A	0.1274	0.042	0.04509	0.2097	3.033	0.002572		19	rs1207132	44280509	A	ADD	-0.1313	-3.033	0.002578
6	rs1367731	32985199	A	0.128	0.0422	0.04528	0.2107	3.033	0.002575		8	GSA-rs7009491	96447233	A	ADD	0.1292	3.032	0.002584
5	rs2431697	159879978	A	-0.1265	0.04172	-0.2083	-0.04476	-3.033	0.002576		8	rs11996955	115465477	A	ADD	0.1302	3.032	0.002587
10	rs10906841	15203275	A	-0.1299	0.04283	-0.2138	-0.04595	-3.033	0.002578		22	rs2413030	31546951	G	ADD	0.1307	3.032	0.002587
3	rs7646959	159072815	A	0.1278	0.04215	0.04521	0.2104	3.033	0.002579		19	rs61132178	50400346	A	ADD	0.1301	3.031	0.002589
5	rs9293273	71621428	A	-0.1268	0.04181	-0.2087	-0.04485	-3.033	0.002579		18	GSA-rs7232987	42334165	A	ADD	0.1296	3.031	0.00259
12	rs12231956	10816999	G	-0.1305	0.04304	-0.2149	-0.04617	-3.032	0.00258		18	rs10853605	48783342	A	ADD	-0.1311	-3.031	0.00259
11	IlmnSeq_rs2237897	2858546	A	-0.1309	0.04317	-0.2155	-0.0463	-3.033	0.002581		20	rs2076380	36793529	A	ADD	-0.1296	-3.031	0.002592
1	rs10797461	233620588	A	0.1271	0.04192	0.04494	0.2093	3.032	0.002583		2	rs6741265	119174985	G	ADD	0.1295	3.031	0.002593
15	rs4886847	77377654	A	0.1285	0.04238	0.04544	0.2116	3.032	0.002583		9	GSA-rs2993156	38531889	G	ADD	0.1346	3.031	0.002596
2	rs766725	19707292	A	0.1268	0.04184	0.04482	0.2088	3.031	0.002591		2	GSA-rs9973852	37460784	G	ADD	0.1311	3.03	0.002597
3	rs2004019	5851892	C	-0.1296	0.04277	-0.2134	-0.04577	-3.03	0.002599		7	rs10227907	151678241	C	ADD	-0.1291	-3.03	0.002598
7	GSA-rs13223177	36762045	G	-0.1265	0.04174	-0.2083	-0.04466	-3.03	0.002601		20	GSA-rs6034225	15579575	A	ADD	0.129	3.03	0.002598
4	rs17675820	165035159	A	-0.1267	0.04181	-0.2086	-0.04472	-3.03	0.002604		12	rs7965589	77092408	A	ADD	-0.129	-3.03	0.002599
4	rs201043171	177545039	A	0.1274	0.04205	0.04498	0.2098	3.03	0.002606		14	rs72718423	66429321	A	ADD	0.1293	3.029	0.00261
18	rs7227813	28052353	G	0.1275	0.04209	0.04499	0.21	3.029	0.00261		12	rs12427050	97546392	G	ADD	-0.1375	-3.029	0.002611
14	rs972396	32435312	A	-0.1274	0.04208	-0.2099	-0.04496	-3.028	0.002614		4	rs6814421	164655112	G	ADD	0.1294	3.029	0.002613
18	IlmnSeq_rs4939941	47639553	A	0.1298	0.04287	0.0458	0.2138	3.028	0.002615		23	rs5939352	2751160	A	ADD	0.1308	3.029	0.002614
18	GSA-rs4939941	47639553	A	0.1298	0.04287	0.0458	0.2138	3.028	0.002615		2	rs2110330	59903052	A	ADD	0.1288	3.028	0.002616
6	rs2784198	51480486	C	-0.1275	0.0421	-0.21	-0.04498	-3.028	0.002617		13	GSA-rs17061126	62806063	A	ADD	0.1298	3.028	0.002616
11	exm2271630	83642842	A	-0.1267	0.04184	-0.2086	-0.04466	-3.027	0.002622		1	rs6677593	170767276	A	ADD	0.1312	3.028	0.002618
17	GSA-rs854767	18018263	C	-0.1276	0.04215	-0.2102	-0.04498	-3.027	0.002625		14	rs4483769	34160070	A	ADD	0.1303	3.028	0.002618
3	rs7612734	6796046	A	-0.1271	0.04201	-0.2095	-0.04481	-3.027	0.002629		2	IlmnSeq_rs4299376	44072576	C	ADD	0.1307	3.027	0.002626
12	rs17356067	96007582	A	0.1266	0.04183	0.04461	0.2086	3.026	0.002631		2	rs4299376	44072576	C	ADD	0.1307	3.027	0.002626
3	rs12486411	177632888	G	-0.1277	0.04221	-0.2105	-0.04499	-3.026	0.002637		21	rs2297256	40558421	G	ADD	-0.1298	-3.027	0.002628
7	rs60865496	156851430	A	-0.127	0.04198	-0.2093	-0.04472	-3.025	0.00264		13	rs17121711	113465320	G	ADD	0.1302	3.027	0.00263
9	GSA-rs11139027	83710943	A	-0.1328	0.04389	-0.2188	-0.04674	-3.025	0.002644		9	GSA-rs3739524	79320095	C	ADD	-0.1285	-3.026	0.002634
5	rs28558979	68820348	C	-0.1279	0.04228	-0.2107	-0.045	-3.024	0.002649		7	GSA-rs403760	138074052	G	ADD	-0.1289	-3.026	0.002635
5	GSA-rs6884988	126469930	G	0.13	0.04301	0.04575	0.2143	3.024	0.002652		2	GSA-rs75694607	168885230	C	ADD	0.1299	3.026	0.002636
6	rs9275578	32679384	A	-0.1267	0.04192	-0.2089	-0.0446	-3.024	0.002652		16	GSA-rs35067556	12904142	A	ADD	0.1287	3.025	0.002639
6	rs9275582	32680070	A	-0.1267	0.04192	-0.2089	-0.0446	-3.024	0.002652		12	rs600223	3352921	G	ADD	-0.1312	-3.025	0.00264
15	rs11071424	59572027	G	0.1266	0.04187	0.0445	0.2086	3.023	0.002663		11	rs1945367	80379533	A	ADD	0.1282	3.025	0.002642
23	JHU_X.122909365	122909366	A	-0.1284	0.04247	-0.2116	-0.04514	-3.023	0.002663		6	rs3804103	25617291	A	ADD	0.1297	3.024	0.00265
11	rs163184	2847069	A	-0.1264	0.04181	-0.2083	-0.04442	-3.023	0.002665		16	GSA-rs11640058	51440678	A	ADD	-0.1328	-3.024	0.00265
4	rs265035	96381385	G	0.1272	0.04207	0.04471	0.2096	3.023	0.002666		1	rs1555025	23886935	C	ADD	0.1301	3.024	0.002654
8	rs2251898	73692121	G	-0.126	0.04168	-0.2077	-0.04428	-3.022	0.002666		4	rs2627654	79378809	G	ADD	0.1288	3.024	0.002655
3	rs2371605	29298404	A	0.1268	0.04195	0.04455	0.209	3.022	0.002668		4	GSA-rs4833924	124412948	A	ADD	-0.1293	-3.024	0.002655
20	GSA-rs6034225	15579575	A	0.1265	0.04187	0.04447	0.2086	3.022	0.00267		3	GSA-rs998807	115914897	C	ADD	0.1291	3.023	0.002657
17	rs75864910	43308547	A	0.1271	0.04205	0.04463	0.2095	3.021	0.002676		16	GSA-rs2326465	85076261	A	ADD	0.1307	3.023	0.002658
7	GSA-rs6959688	1966831	G	0.1265	0.04187	0.04442	0.2085	3.021	0.002679		1	rs35105673	48233464	A	ADD	0.1299	3.023	0.002659
17	rs4796217	34819191	G	0.1268	0.04198	0.04452	0.2091	3.021	0.00268		10	INMG_11245	128000666	G	ADD	-0.1311	-3.023	0.002659
6	rs6905949	30140525	G	0.1281	0.04242	0.04499	0.2113	3.02	0.002682		11	GSA-rs1939303	126437631	A	ADD	-0.1291	-3.023	0.002659
20	rs6108474	10306292	A	-0.1275	0.0422	-0.2102	-0.04474	-3.02	0.002686		10	rs7902516	10179752	G	ADD	0.1284	3.023	0.00266
6	rs3957146	32681530	G	-0.126	0.04171	-0.2077	-0.0442	-3.02	0.002688		6	GSA-rs6927442	145078694	A	ADD	0.1453	3.023	0.002661
9	GSA-rs62578311	83459788	A	-0.132	0.04372	-0.2177	-0.0463	-3.019	0.002695		8	rs11782143	5461409	A	ADD	0.128	3.023	0.002661
23	rs1781987	117458174	A	0.1321	0.04378	0.04635	0.2179	3.019	0.002697		19	rs6509740	53738985	G	ADD	0.1298	3.022	0.002668
1	GSA-rs2419343	68630667	G	-0.1279	0.04237	-0.211	-0.04487	-3.019	0.002698		3	GSA-rs394558	10302172	A	ADD	0.1285	3.021	0.002674
10	rs10823620	72540248	C	0.1269	0.04205	0.04451	0.2093	3.019	0.002699		14	rs17824591	64887711	A	ADD	-0.1303	-3.021	0.002675
12	rs10773917	132006831	A	-0.1263	0.04183	-0.2083	-0.04428	-3.019	0.002699		11	rs4592448	86307016	C	ADD	-0.1291	-3.021	0.002678
21	rs522332	20936378	A	0.1271	0.0421	0.04455	0.2096	3.018	0.002703		9	GSA-rs990000	80086534	G	ADD	0.1286	3.021	0.002679
21	rs2837961	42518599	A	-0.1304	0.04321	-0.2151	-0.04573	-3.018	0.002703		19	rs1275221	51487067	A	ADD	-0.1281	-3.021	0.00268
3	GSA-rs75979027	23034520	G	0.1274	0.04221	0.04465	0.2101	3.018	0.002705		12	GSA-rs11181598	43027611	G	ADD	0.128	3.02	0.002682
2	rs17044554	23218255	C	-0.1281	0.04247	-0.2114	-0.04491	-3.017	0.002708		21	rs2410102	40499424	C	ADD	-0.1283	-3.02	0.002682
6	rs9276975	32973599	A	0.1271	0.04212	0.04454	0.2096	3.017	0.002708		8	rs7003181	79871922	A	ADD	-0.1282	-3.02	0.002688
13	rs9603541	40021077	G	-0.1269	0.04205	-0.2093	-0.04446	-3.017	0.002709		14	rs8021858	94940717	A	ADD	0.1293	3.019	0.002691
18	rs9952024	61782883	A	-0.1275	0.04228	-0.2104	-0.04469	-3.017	0.002712		21	rs13051463	23186263	C	ADD	0.1288	3.019	0.002694
2	rs4670306	34111779	A	0.1274	0.04221	0.04462	0.2101	3.017	0.002715		12	rs10859537	94001048	A	ADD	0.1313	3.019	0.002697
10	GSA-rs10996706	67599729	A	0.1259	0.04173	0.04409	0.2077	3.017	0.002715		10	rs10762269	70998001	G	ADD	0.1284	3.019	0.002698
4	IlmnSeq_rs9999662	7424945	A	-0.1284	0.04259	-0.2119	-0.04497	-3.016	0.002723		9	rs9409929	137340513	A	ADD	0.1306	3.018	0.002705
4	rs9999662	7424945	A	-0.1284	0.04259	-0.2119	-0.04497	-3.016	0.002723		8	GSA-rs1445559	81855797	G	ADD	-0.1285	-3.017	0.002709
6	rs10588452	92907517	A	-0.1307	0.04335	-0.2157	-0.04576	-3.015	0.002726		3	rs2625973	129284818	C	ADD	-0.1304	-3.017	0.002715
3	rs1567734	86294252	A	0.1271	0.04217	0.0445	0.2098	3.015	0.002727		6	rs34480201	155496703	G	ADD	0.1294	3.017	0.002715
6	rs2647087	32681049	C	0.1261	0.04183	0.04414	0.2081	3.015	0.002729		15	rs8024171	91671076	G	ADD	-0.1285	-3.017	0.002715
6	GSA-rs79911433	116194053	A	0.1284	0.04258	0.04492	0.2118	3.015	0.002729		23	kgp22817402	88112534	C	ADD	-0.1306	-3.017	0.002715
6	rs1264562	30372812	C	0.1284	0.04258	0.04491	0.2118	3.015	0.002732		23	rs1409993	69266212	A	ADD	-0.138	-3.017	0.002716
13	rs5802394	27372355	A	0.1279	0.04244	0.04476	0.2111	3.014	0.002734		9	GSA-rs10980041	112556945	G	ADD	-0.1283	-3.016	0.002718
6	rs12215687	145720470	G	-0.1274	0.04228	-0.2103	-0.04455	-3.014	0.002741		13	rs643765	97232646	C	ADD	0.1319	3.016	0.00272
12	GSA-rs2684906	51041443	A	-0.129	0.04281	-0.2129	-0.04511	-3.014	0.002742		11	rs35327700	130575711	A	ADD	0.128	3.016	0.002721
13	GSA-rs1417205	47898879	G	-0.1268	0.04207	-0.2092	-0.04431	-3.013	0.002744		10	rs10823804	73380904	A	ADD	-0.1294	-3.016	0.002722
6	rs3763295	31587938	G	-0.1281	0.04252	-0.2115	-0.04478	-3.013	0.002747		18	rs34495622	11861402	A	ADD	0.1317	3.015	0.00273
5	rs696832	32725545	G	0.1259	0.04177	0.04399	0.2077	3.013	0.002748		23	rs6617745	88004302	G	ADD	-0.1307	-3.015	0.002731
6	rs7755014	106824214	G	0.1266	0.04203	0.04426	0.209	3.013	0.002748		4	GSA-rs4416520	179936956	G	ADD	0.129	3.014	0.002735
7	rs2718178	36638372	C	0.1298	0.04308	0.04536	0.2142	3.013	0.002748		19	GSA-rs76164526	9689154	G	ADD	-0.1321	-3.014	0.002736
23	rs28665015	69658897	G	0.1271	0.04219	0.04442	0.2098	3.013	0.002749		13	kgp217822	97232646	C	ADD	0.1316	3.014	0.002738
2	rs6721270	10521126	G	-0.1261	0.04185	-0.2081	-0.04406	-3.013	0.00275		5	exm2264151	116968077	A	ADD	0.133	3.014	0.002739
12	rs12322163	108057637	A	-0.1288	0.04277	-0.2127	-0.04501	-3.012	0.002753		17	rs4474738	32028162	A	ADD	-0.1287	-3.014	0.002742
23	rs1218108	117393540	G	0.1413	0.0469	0.04934	0.2332	3.012	0.002756		4	GSA-rs62316449	132421980	A	ADD	0.1287	3.013	0.002748
2	GSA-rs579060	169783039	C	0.1294	0.04296	0.0452	0.2136	3.012	0.002757		14	IlmnSeq_rs75625693	35095988	G	ADD	0.1327	3.013	0.002748
13	rs7332653	97517119	A	-0.1264	0.04198	-0.2087	-0.04414	-3.011	0.002762		16	rs12449228	6205324	A	ADD	-0.1304	-3.013	0.002751
9	GSA-rs734769	100844198	G	-0.1281	0.04255	-0.2115	-0.04473	-3.011	0.002763		3	rs2067877	155630845	G	ADD	0.1321	3.012	0.002754
1	rs72700488	165162753	C	0.1272	0.04226	0.04438	0.21	3.01	0.002772		4	GSA-rs79435737	131062932	A	ADD	0.1293	3.012	0.002754
5	rs56262117	156884549	A	-0.1263	0.04195	-0.2085	-0.04406	-3.01	0.002773		2	rs6724963	165701577	A	ADD	-0.1277	-3.012	0.002756
3	rs481766	8098663	A	-0.1261	0.0419	-0.2082	-0.04399	-3.01	0.002775		8	rs7814654	1306388	A	ADD	0.1274	3.012	0.002758
16	rs2059246	83662283	A	0.1265	0.04204	0.0441	0.2089	3.009	0.002783		9	GSA-rs10813246	30403952	A	ADD	0.128	3.012	0.002758
7	rs2965042	4972973	A	-0.1317	0.04379	-0.2176	-0.04592	-3.009	0.002786		6	rs2744422	163794506	G	ADD	-0.1326	-3.01	0.002775
5	GSA-rs10068808	133374367	A	0.1266	0.04209	0.04411	0.2091	3.008	0.002794		1	rs11240271	204747491	G	ADD	-0.1381	-3.01	0.002776
11	rs488864	96043367	A	-0.1284	0.0427	-0.2121	-0.04474	-3.008	0.002795		21	GSA-rs9974464	40500901	G	ADD	-0.128	-3.01	0.002778
9	GSA-rs10491914	9896971	A	0.1268	0.04216	0.04412	0.2094	3.006	0.002806		20	rs6041764	12990702	G	ADD	-0.1296	-3.009	0.002779
20	GSA-rs73602232	7434849	A	-0.1256	0.04178	-0.2075	-0.04371	-3.006	0.002807		5	rs7728338	144040158	A	ADD	-0.1294	-3.009	0.00278
17	rs7210047	27728496	A	-0.1263	0.04202	-0.2087	-0.04397	-3.006	0.002808		3	rs7633390	75861696	A	ADD	0.1275	3.009	0.002783
17	GSA-rs7208675	27737148	G	-0.1263	0.04202	-0.2087	-0.04397	-3.006	0.002808		6	rs1880781	117544308	A	ADD	0.1302	3.009	0.002783
17	GSA-rs4794856	27742392	A	-0.1263	0.04202	-0.2087	-0.04397	-3.006	0.002808		3	GSA-rs6792870	159523497	G	ADD	-0.1281	-3.009	0.002784
17	GSA-rs9916533	27771128	G	-0.1263	0.04202	-0.2087	-0.04397	-3.006	0.002808		14	rs7154112	59714317	G	ADD	0.1299	3.009	0.002786
3	GSA-rs6794496	132401600	A	0.1255	0.04174	0.04365	0.2073	3.006	0.002813		12	rs929709	4521913	G	ADD	0.1299	3.008	0.002787
18	rs5001894	48744134	A	-0.1261	0.04197	-0.2083	-0.0438	-3.004	0.002832		3	rs9840539	70479629	G	ADD	-0.1285	-3.008	0.002789
1	rs4927151	55176652	A	-0.1266	0.04216	-0.2092	-0.04397	-3.003	0.002839		13	GSA-rs7336352	44115099	G	ADD	0.1288	3.008	0.002796
20	rs4814441	16146742	A	-0.1264	0.04209	-0.2089	-0.04389	-3.003	0.00284		2	rs10198628	12964497	A	ADD	-0.1283	-3.007	0.002798
1	rs2172507	76331320	A	0.1265	0.04212	0.04391	0.209	3.002	0.002842		12	rs12304647	54384947	C	ADD	0.1306	3.007	0.002801
23	exm2262724	113890903	A	0.1313	0.04373	0.04557	0.217	3.002	0.002847		20	rs11696312	55372987	C	ADD	-0.1289	-3.006	0.002809
4	rs2668076	74877144	A	-0.1256	0.04185	-0.2077	-0.0436	-3.002	0.002848		23	rs5980899	69349379	C	ADD	-0.1351	-3.006	0.002809
15	GSA-rs4777841	93868572	G	0.1275	0.04246	0.04424	0.2107	3.002	0.002848		23	rs3795170	69258515	A	ADD	-0.1362	-3.006	0.002814
2	rs355895	165635869	A	-0.1262	0.04204	-0.2086	-0.04379	-3.002	0.002849		2	rs4245791	44074431	G	ADD	0.13	3.005	0.002816
4	rs4689276	5682189	G	0.127	0.0423	0.04405	0.2099	3.001	0.002852		2	GSA-rs848626	36800066	A	ADD	0.1301	3.005	0.002822
22	GSA-rs138794	35733654	A	0.1255	0.04182	0.04354	0.2075	3.001	0.002855		13	rs2407795	50195882	A	ADD	0.1297	3.005	0.002823
2	rs1358423	123742223	A	-0.1297	0.04321	-0.2143	-0.04498	-3.001	0.002856		1	rs666152	4518202	A	ADD	-0.1286	-3.004	0.002828
14	IlmnSeq_rs11158170	58173373	G	-0.1259	0.04195	-0.2081	-0.04366	-3.001	0.002857		7	rs2204133	54619136	G	ADD	0.1283	3.004	0.002828
1	rs12751100	1220954	A	0.1287	0.04289	0.04462	0.2127	3	0.002861		8	rs6992840	4875997	A	ADD	0.1295	3.004	0.002832
23	rs5932550	128084590	G	0.1278	0.0426	0.04433	0.2113	3	0.002861		2	rs6544713	44073881	A	ADD	0.1298	3.003	0.002835
6	rs9342215	90615280	G	0.1271	0.04236	0.04406	0.2101	3	0.002862		15	GSA-rs1055879	100327067	A	ADD	0.1281	3.003	0.002837
10	GSA-rs10996819	67759006	C	0.1256	0.04187	0.04356	0.2077	3	0.002862		10	rs788970	21185661	A	ADD	0.1299	3.003	0.002838
23	kgp22804142	22892801	G	0.1276	0.04251	0.04423	0.2109	3	0.002862		6	rs1407794	5827500	A	ADD	0.1308	3.002	0.002842
14	rs11158170	58173373	G	-0.1258	0.04194	-0.208	-0.04362	-3	0.002863		6	rs2082261	32990506	A	ADD	0.1276	3.002	0.002844
6	rs9372250	110655443	G	0.1267	0.04224	0.04391	0.2095	3	0.002868		1	rs6683283	203021762	G	ADD	-0.129	-3.002	0.002846
14	rs10150603	92956184	A	0.1259	0.04198	0.04362	0.2082	2.999	0.002874		10	rs12356435	10136473	A	ADD	-0.1279	-3.002	0.002846
11	rs4325287	36729657	A	-0.1273	0.04246	-0.2106	-0.04411	-2.999	0.002876		3	GSA-rs79648973	32351201	A	ADD	-0.128	-3.001	0.002851
11	rs2237897	2858546	A	-0.129	0.04302	-0.2133	-0.04467	-2.998	0.002881		4	rs11945180	101238386	A	ADD	0.1313	3.002	0.002851
8	rs4961374	142364163	A	-0.1256	0.0419	-0.2078	-0.0435	-2.998	0.002883		3	rs28616661	86556379	G	ADD	0.1285	3.002	0.002852
10	rs7096268	16695008	G	-0.1258	0.04195	-0.208	-0.04354	-2.998	0.002885		8	rs4875316	4160944	A	ADD	-0.1278	-3.001	0.002852
15	rs11638539	98011987	A	0.1281	0.04274	0.04435	0.2119	2.998	0.002886		12	rs2335451	49664786	A	ADD	0.1293	3.001	0.002856
18	GSA-rs6508522	25557873	A	0.1287	0.04295	0.04456	0.2129	2.998	0.002887		13	GSA-rs17068763	47314326	G	ADD	0.1293	3.001	0.002857
2	GSA-rs566879	169783209	A	0.1278	0.04263	0.04422	0.2113	2.997	0.002892		11	rs318982	131415267	A	ADD	0.1305	3.001	0.002859
6	rs1579219	30224305	A	-0.1276	0.04258	-0.2111	-0.04414	-2.996	0.002898		19	rs34752754	17766900	A	ADD	-0.1314	-3	0.00286
2	rs2681019	23187504	C	-0.1263	0.04216	-0.209	-0.0437	-2.996	0.0029		6	rs757631	139744270	A	ADD	0.1329	3	0.002862
17	GSA-rs16970576	75825749	G	0.1262	0.04212	0.04365	0.2087	2.996	0.0029		16	GSA-rs142784127	71042864	G	ADD	0.1269	3	0.002862
2	GSA-rs3891919	200734336	A	-0.1267	0.0423	-0.2097	-0.04383	-2.996	0.002902		15	rs55956502	60221483	A	ADD	0.1284	3	0.002868
2	rs72952700	217030000	A	0.1262	0.04213	0.04363	0.2088	2.996	0.002906		15	GSA-rs6494007	58734645	A	ADD	-0.1412	-2.999	0.00287
11	rs4427583	133403337	A	0.1257	0.04198	0.04343	0.208	2.995	0.002914		1	rs626733	59946350	A	ADD	-0.1286	-2.999	0.002875
2	rs919883	47248111	A	0.1275	0.04258	0.04403	0.2109	2.994	0.002919		15	rs10519148	62720363	A	ADD	0.1299	2.999	0.002877
11	rs632411	107644296	A	-0.1296	0.04329	-0.2144	-0.04476	-2.994	0.002921		10	rs75497793	112562518	A	ADD	-0.1273	-2.998	0.002884
2	rs6757951	223355051	A	-0.1273	0.04254	-0.2107	-0.04397	-2.994	0.002924		7	rs57548226	16392103	G	ADD	-0.1298	-2.997	0.002888
12	GSA-rs76457071	50972884	C	-0.1285	0.04292	-0.2126	-0.04436	-2.994	0.002925		10	rs12241298	19578455	A	ADD	-0.1275	-2.997	0.002888
14	GSA-rs56152605	93031325	A	0.1254	0.0419	0.0433	0.2076	2.993	0.002928		4	rs17365700	175725724	A	ADD	0.1275	2.997	0.002893
2	rs16865645	178561295	A	0.1264	0.04225	0.04364	0.2093	2.993	0.002933		14	rs761874	23596320	A	ADD	-0.1313	-2.997	0.002893
8	rs11786081	15799268	G	0.1267	0.04234	0.04372	0.2097	2.993	0.002934		4	rs356219	90637601	A	ADD	0.1293	2.997	0.002894
1	rs371955	76622286	A	0.1264	0.04224	0.0436	0.2092	2.992	0.002938		15	rs12593663	95207022	A	ADD	0.1302	2.997	0.002896
3	rs62410763	196554266	A	0.1267	0.04234	0.04367	0.2096	2.991	0.002945		10	rs7897711	80698871	G	ADD	0.129	2.996	0.002906
6	rs9504703	6171892	C	0.1276	0.04265	0.04399	0.2112	2.991	0.002945		12	rs11610812	43034673	G	ADD	-0.1272	-2.996	0.002906
14	rs17097735	31578762	A	0.1253	0.04188	0.04319	0.2074	2.991	0.002946		6	rs62432683	151213906	C	ADD	-0.1289	-2.995	0.002911
2	IlmnSeq_rs7562116	232108246	G	-0.1253	0.04189	-0.2074	-0.04318	-2.991	0.00295		10	INMG_00003	45869748	A	ADD	-0.1278	-2.994	0.002918
14	rs12884468	35852486	A	-0.126	0.04213	-0.2086	-0.04343	-2.991	0.00295		19	GSA-rs2234373	36207077	A	ADD	0.1289	2.994	0.002918
2	rs7598513	52023773	G	-0.1266	0.04234	-0.2096	-0.04364	-2.991	0.002952		23	rs5991112	115068445	G	ADD	-0.1382	-2.994	0.002919
12	GSA-rs10047654	106849036	A	-0.1255	0.04197	-0.2078	-0.04324	-2.99	0.002956		5	rs1552240	125862026	G	ADD	-0.1269	-2.994	0.002921
2	rs10490105	59312140	A	0.1271	0.0425	0.04378	0.2104	2.99	0.002957		15	GSA-rs75777669	48173066	G	ADD	0.1273	2.994	0.002921
18	rs2110540	10151888	G	0.127	0.04247	0.04375	0.2102	2.99	0.002957		4	rs6851495	96688897	A	ADD	-0.1286	-2.994	0.002923
6	rs9268835	32428115	A	-0.1249	0.04177	-0.2068	-0.04302	-2.99	0.002959		23	JHU_X.150262530	150262531	A	ADD	0.1335	2.994	0.002924
6	rs9294917	169236144	A	0.1255	0.04198	0.04323	0.2078	2.99	0.002962		2	rs1550430	42227952	A	ADD	0.1365	2.994	0.002925
5	rs325260	143110862	A	0.1284	0.04296	0.04423	0.2126	2.989	0.002964		9	GSA-rs74312734	140758361	A	ADD	0.133	2.993	0.002927
7	rs57124426	157616296	A	-0.1252	0.04188	-0.2073	-0.04311	-2.989	0.002965		18	rs618318	41014741	A	ADD	0.1298	2.993	0.002927
6	rs4713942	36227308	G	0.1257	0.04205	0.04325	0.2081	2.988	0.002974		13	rs9534235	46419632	G	ADD	-0.1282	-2.993	0.002932
10	rs2138554	113310787	A	0.1277	0.04273	0.04394	0.2114	2.988	0.002975		10	rs869545	73076862	A	ADD	0.1303	2.992	0.002935
8	rs34640696	58700462	A	0.126	0.04217	0.04334	0.2087	2.988	0.002984		5	rs12519740	168066517	A	ADD	-0.1301	-2.992	0.002937
17	GSA-rs1568373	27760143	A	-0.1257	0.04208	-0.2082	-0.04322	-2.987	0.002987		9	GSA-rs10960798	1288255	A	ADD	-0.1272	-2.992	0.002938
11	rs10834761	3686221	A	-0.1258	0.04213	-0.2084	-0.04324	-2.986	0.002993		12	rs672085	31013127	C	ADD	0.1286	2.992	0.002941
2	rs10183172	241995014	C	-0.1265	0.04238	-0.2096	-0.04347	-2.986	0.003		8	rs11784122	16877881	C	ADD	0.1282	2.992	0.002943
1	GSA-rs10799802	24009544	G	-0.125	0.04185	-0.207	-0.04292	-2.985	0.003001		14	rs12432729	55941431	A	ADD	-0.1269	-2.992	0.002943
2	GSA-rs7600772	123525820	C	-0.1252	0.04194	-0.2074	-0.04301	-2.985	0.003002		1	rs9435329	107488331	G	ADD	-0.1283	-2.991	0.002944
6	rs10947072	30372278	A	0.1247	0.04178	0.04282	0.2066	2.985	0.003007		4	rs2036891	132455666	C	ADD	-0.1288	-2.992	0.002945
6	rs9368649	30938883	G	-0.1255	0.04204	-0.2079	-0.04308	-2.985	0.003008		23	rs5971903	34903751	A	ADD	-0.1335	-2.992	0.002945
7	rs11983401	9048143	A	0.1269	0.04252	0.04357	0.2102	2.985	0.003008		10	IlmnSeq_rs11001157	53958511	A	ADD	0.131	2.991	0.002947
4	rs10857365	164865947	C	-0.1246	0.04174	-0.2064	-0.04275	-2.984	0.003014		10	rs11001157	53958511	A	ADD	0.131	2.991	0.002947
9	GSA-rs915508	26359485	G	-0.1266	0.04244	-0.2098	-0.04345	-2.984	0.003016		13	rs9560359	90143125	G	ADD	0.1291	2.991	0.002947
2	rs759255	75788396	A	-0.1246	0.04176	-0.2064	-0.04273	-2.983	0.003023		4	rs28657004	83632994	C	ADD	0.1305	2.991	0.002949
6	rs9393112	167869557	A	-0.126	0.04223	-0.2087	-0.0432	-2.983	0.003027		5	rs434097	116962366	A	ADD	0.1312	2.991	0.002949
22	GSA-rs5765163	45484509	A	-0.1247	0.04181	-0.2066	-0.04276	-2.983	0.003027		3	GSA-rs12635320	147266614	A	ADD	-0.1281	-2.991	0.002951
3	GSA-rs7646416	117461709	G	-0.1264	0.04238	-0.2094	-0.04334	-2.983	0.003029		1	rs2072748	26097731	G	ADD	0.1269	2.99	0.002954
17	rs4239230	25689822	G	0.1257	0.04214	0.04308	0.2083	2.982	0.00303		11	rs12275472	35170928	A	ADD	-0.1271	-2.99	0.00296
12	rs1918231	41711669	A	-0.1252	0.04197	-0.2074	-0.0429	-2.982	0.003034		4	rs9992696	132192738	C	ADD	0.1268	2.989	0.002969
10	rs2253002	57013880	A	0.1274	0.04273	0.04366	0.2111	2.982	0.003035		6	rs6911868	76272584	G	ADD	-0.1307	-2.989	0.00297
3	rs7620511	64902050	G	-0.1251	0.04197	-0.2074	-0.04287	-2.982	0.003039		4	GSA-rs736592	179374252	A	ADD	-0.1269	-2.988	0.002974
2	JHU_2.127435300	127435301	A	0.1259	0.04224	0.04312	0.2087	2.981	0.003047		11	rs7938281	112676385	A	ADD	-0.1273	-2.988	0.002979
3	GSA-rs2555707	140692486	C	-0.1258	0.0422	-0.2085	-0.04307	-2.981	0.003049		13	rs35549808	93757119	C	ADD	-0.1273	-2.987	0.002982
20	rs2424651	24725229	A	-0.1266	0.04248	-0.2099	-0.04335	-2.98	0.003049		9	GSA-rs10738183	10713780	G	ADD	0.1298	2.988	0.002983
4	IlmnSeq_rs6841912	170927723	A	0.129	0.04329	0.04416	0.2139	2.98	0.003056		12	GSA-rs7974531	95325819	A	ADD	-0.1268	-2.987	0.002985
16	IlmnSeq_rs4673	88713236	A	-0.1253	0.04207	-0.2078	-0.04287	-2.979	0.003064		11	rs484261	66061233	C	ADD	-0.1273	-2.987	0.002987
16	rs4673	88713236	A	-0.1253	0.04207	-0.2078	-0.04287	-2.979	0.003064		19	GSA-rs116311600	16214684	A	ADD	0.1278	2.987	0.002987
10	rs997066	56039219	G	0.1276	0.04283	0.04365	0.2116	2.979	0.003065		17	GSA-rs7207654	36000607	G	ADD	-0.1281	-2.986	0.002993
12	rs7971297	131872850	A	0.1244	0.04176	0.04253	0.2062	2.978	0.00307		6	GSA-rs2647415	76375321	A	ADD	-0.1304	-2.985	0.003001
10	rs6585248	115631743	G	0.1297	0.04356	0.04434	0.2151	2.978	0.003075		8	rs1108353	130487654	A	ADD	0.1283	2.985	0.003002
6	rs2074474	30309508	G	-0.126	0.04232	-0.209	-0.04308	-2.978	0.003076		12	rs10850104	113385375	G	ADD	0.1281	2.985	0.003002
17	GSA-rs4795510	27778834	G	-0.1254	0.0421	-0.2079	-0.04285	-2.978	0.003077		9	GSA-rs10738889	32458053	A	ADD	-0.1281	-2.985	0.003003
11	GSA-rs7129777	102512086	A	0.1262	0.04238	0.04312	0.2092	2.978	0.003078		2	rs62106670	8597123	A	ADD	-0.1285	-2.985	0.003004
12	rs73382351	104846282	A	0.1247	0.04188	0.04262	0.2068	2.978	0.003079		9	GSA-rs10739000	38509256	A	ADD	0.1297	2.985	0.003004
14	IlmnSeq_rs3803304	105239146	C	0.1247	0.04187	0.0426	0.2067	2.977	0.00308		16	GSA-rs12933503	82891089	A	ADD	-0.1268	-2.985	0.00301
18	rs11875019	22111406	A	-0.1265	0.04248	-0.2098	-0.04322	-2.977	0.003081		2	rs72963707	126459984	C	ADD	0.127	2.984	0.003012
20	rs2206138	9252390	A	0.1253	0.04209	0.04278	0.2078	2.977	0.003088		6	GSA-rs934147	53239608	A	ADD	-0.1289	-2.984	0.003012
8	rs4734976	108543767	C	-0.1267	0.04258	-0.2102	-0.04326	-2.976	0.003094		8	rs12542409	2792579	G	ADD	-0.1288	-2.984	0.003018
7	GSA-rs959173	116182054	G	0.1267	0.04258	0.04325	0.2102	2.976	0.003097		10	GSA-rs9416610	59472805	A	ADD	-0.127	-2.984	0.003018
16	rs10852240	20321423	G	0.1308	0.04397	0.04465	0.217	2.976	0.003097		20	IlmnSeq_rs117661266	54100581	A	ADD	0.131	2.984	0.00302
3	rs3914303	131884654	A	0.1289	0.04331	0.04397	0.2138	2.975	0.003102		18	rs72894278	37002644	C	ADD	0.1287	2.983	0.003023
18	rs28534746	57642266	A	0.1269	0.04265	0.0433	0.2105	2.975	0.003102		19	rs626616	56032163	A	ADD	-0.128	-2.983	0.003024
8	rs16914984	93454053	A	0.1282	0.04311	0.04375	0.2127	2.975	0.003105		18	GSA-rs12185395	40510118	A	ADD	-0.1361	-2.983	0.003029
20	rs6021639	50644475	A	0.126	0.04236	0.04299	0.209	2.975	0.003106		5	GSA-rs73318542	167957770	A	ADD	-0.1308	-2.982	0.003032
1	GSA-rs6703128	109238145	A	-0.1256	0.04222	-0.2084	-0.04284	-2.975	0.003108		2	rs1550094	233385396	G	ADD	-0.1295	-2.982	0.003033
15	IlmnSeq_rs12902904	68076533	A	0.1249	0.042	0.04261	0.2073	2.974	0.00311		21	rs2836900	40499166	G	ADD	-0.1288	-2.982	0.003033
21	rs2187238	42872751	G	-0.1249	0.04201	-0.2073	-0.04258	-2.973	0.003118		2	rs494819	239324624	A	ADD	0.1261	2.982	0.003034
1	rs12029375	165166002	A	0.1271	0.04274	0.04333	0.2109	2.974	0.00312		1	rs11576263	118842089	G	ADD	0.1273	2.982	0.003036
6	rs9393999	30241114	G	-0.1277	0.04296	-0.2119	-0.04353	-2.973	0.003121		7	GSA-rs10246950	109279682	G	ADD	-0.1268	-2.982	0.003036
5	rs6556817	164751379	A	-0.1255	0.04222	-0.2083	-0.04279	-2.973	0.003122		21	rs9978170	21624371	A	ADD	-0.1286	-2.981	0.003043
15	rs41508349	99499354	A	-0.1255	0.04222	-0.2083	-0.04277	-2.973	0.003123		4	GSA-rs11100727	142732365	G	ADD	-0.1271	-2.981	0.003045
10	rs2296581	104242886	A	0.1267	0.04261	0.04315	0.2102	2.973	0.003127		3	rs17042809	16892111	A	ADD	0.1265	2.981	0.003048
18	GSA-rs3859337	76711366	A	-0.127	0.04272	-0.2107	-0.04323	-2.972	0.003135		5	rs12522469	39275472	A	ADD	-0.1307	-2.98	0.003049
8	GSA-rs1552549	84471850	A	0.1266	0.04263	0.04305	0.2101	2.97	0.003154		18	GSA-rs11081080	3954314	G	ADD	-0.1273	-2.98	0.00305
12	GSA-rs7973163	129213445	A	0.1239	0.04172	0.04213	0.2057	2.97	0.003156		12	rs9593	109994870	A	ADD	-0.1265	-2.98	0.003052
6	rs4959314	4703123	C	0.1242	0.04181	0.04221	0.2061	2.97	0.003158		13	rs111959532	46730165	A	ADD	0.1269	2.98	0.003055
17	GSA-rs9901247	27672643	A	-0.1259	0.0424	-0.209	-0.0428	-2.969	0.003162		3	GSA-rs11925123	137764127	A	ADD	-0.1262	-2.98	0.003058
1	rs685475	239924343	A	-0.1251	0.04215	-0.2078	-0.04253	-2.969	0.003164		16	rs1858987	19986177	A	ADD	0.1264	2.978	0.003074
3	GSA-rs11716263	5481959	G	-0.126	0.04245	-0.2092	-0.04283	-2.969	0.003164		21	GSA-rs8133923	23222378	A	ADD	0.127	2.978	0.003074
16	rs4781701	16060942	G	-0.127	0.04278	-0.2109	-0.04317	-2.969	0.003164		7	IlmnSeq_rs28156	82646210	G	ADD	0.1316	2.978	0.003076
6	rs9467550	25653401	G	0.1244	0.04189	0.04226	0.2065	2.969	0.003166		7	rs28156	82646210	G	ADD	0.1316	2.978	0.003076
6	rs2535323	30718180	G	-0.1266	0.04264	-0.2101	-0.043	-2.969	0.003167		4	rs3822010	81104548	A	ADD	0.1276	2.977	0.003083
7	rs6947288	22059791	G	0.1259	0.04242	0.04279	0.2091	2.969	0.003167		5	GSA-rs12517164	168088162	A	ADD	-0.1294	-2.977	0.003084
12	rs10880344	43063884	G	-0.1267	0.04269	-0.2104	-0.04306	-2.969	0.003168		9	IlmnSeq_rs9409929	137340513	A	ADD	0.1285	2.977	0.003086
6	rs12203825	30372001	A	0.1238	0.0417	0.04206	0.2055	2.968	0.00317		5	rs6891369	173504716	G	ADD	-0.1274	-2.977	0.003087
10	rs12358291	21567436	A	-0.1244	0.04191	-0.2065	-0.04225	-2.968	0.003172		18	rs539531	41033886	G	ADD	0.1289	2.977	0.003087
3	rs4839597	142937745	C	0.1238	0.0417	0.04203	0.2055	2.968	0.003175		2	rs11897805	40725202	G	ADD	0.1282	2.976	0.003092
20	rs6105944	1913481	G	-0.1253	0.0422	-0.208	-0.04254	-2.968	0.003175		11	rs11235369	87620018	G	ADD	0.128	2.975	0.003102
3	rs10470697	58165233	A	0.1251	0.04215	0.04247	0.2077	2.968	0.003176		23	rs545253	69350281	A	ADD	-0.1355	-2.975	0.003102
14	rs8007976	93032986	G	0.1249	0.04207	0.0424	0.2073	2.968	0.003177		20	rs6080400	16743911	A	ADD	-0.1278	-2.974	0.00311
4	GSA-rs79435737	131062932	A	0.1254	0.04228	0.04258	0.2083	2.967	0.003182		3	rs6798585	84063290	G	ADD	-0.1278	-2.974	0.003111
1	rs74052097	11028623	A	0.1247	0.04203	0.04231	0.2071	2.967	0.003185		17	rs12450574	3412305	G	ADD	0.1278	2.974	0.003111
6	GSA-rs72918692	93044855	A	-0.1277	0.04303	-0.212	-0.04332	-2.967	0.003186		18	IlmnSeq_rs16945681	3936384	G	ADD	-0.1271	-2.974	0.003112
3	rs67976654	133702144	G	0.1247	0.04205	0.04232	0.2071	2.966	0.003189		18	rs16945681	3936384	G	ADD	-0.1271	-2.974	0.003112
14	IlmnSeq_rs78509311	21638319	C	-0.1374	0.04632	-0.2282	-0.0466	-2.966	0.003193		9	GSA-rs10969072	29293665	G	ADD	-0.1279	-2.974	0.003116
14	rs78509311	21638319	C	-0.1374	0.04632	-0.2282	-0.0466	-2.966	0.003193		14	GSA-rs112849692	104665540	G	ADD	-0.128	-2.974	0.003117
19	rs1207132	44280509	A	-0.1265	0.04265	-0.2101	-0.0429	-2.966	0.003195		19	rs74359325	50394886	A	ADD	0.1272	2.974	0.003117
2	IlmnSeq_rs515135	21286057	A	-0.1249	0.04213	-0.2075	-0.04237	-2.966	0.003196		9	GSA-rs6604	139934107	A	ADD	0.1283	2.972	0.003128
4	GSA-rs2123666	72397550	C	0.1248	0.0421	0.04234	0.2074	2.966	0.003198		11	rs7125943	18735947	A	ADD	-0.1272	-2.972	0.003133
4	rs12508530	31366651	A	0.1273	0.04294	0.04316	0.2115	2.965	0.003202		8	rs10103418	130898263	C	ADD	0.1261	2.971	0.003138
1	GSA-rs3762268	153522350	G	-0.1237	0.04173	-0.2055	-0.04194	-2.965	0.003203		14	rs10149750	104628406	G	ADD	-0.1257	-2.971	0.00314
2	rs34401811	110409205	A	-0.1245	0.04201	-0.2069	-0.0422	-2.965	0.003208		3	rs9311998	7903022	A	ADD	-0.1272	-2.971	0.003143
4	rs986808	177418671	G	-0.125	0.04215	-0.2076	-0.04235	-2.965	0.003208		4	rs7667122	78947327	G	ADD	0.126	2.971	0.003145
2	rs964327	180244477	G	0.1263	0.0426	0.04279	0.2098	2.964	0.003209		14	IlmnSeq_rs1663330	66443496	G	ADD	0.1274	2.97	0.003149
6	rs9276977	32973841	A	0.1252	0.04226	0.04242	0.2081	2.964	0.003216		14	rs1663330	66443496	G	ADD	0.1274	2.97	0.003149
22	GSA-rs138780	35712553	A	-0.1266	0.04274	-0.2104	-0.04286	-2.963	0.003227		1	rs1500941	153087661	G	ADD	-0.1261	-2.97	0.003151
6	rs3804103	25617291	A	0.1251	0.04224	0.04234	0.2079	2.962	0.003231		6	GSA-rs4945661	120915342	A	ADD	0.126	2.97	0.003151
7	rs73124004	40700633	G	0.1266	0.04273	0.04283	0.2103	2.962	0.003231		9	GSA-rs7860045	89285932	G	ADD	-0.1283	-2.969	0.003162
19	rs2967614	8458145	G	0.1236	0.04173	0.04182	0.2054	2.962	0.003232		19	rs733288	3352006	A	ADD	-0.1263	-2.969	0.003165
3	rs11927890	132002082	G	0.1271	0.04291	0.04298	0.2112	2.962	0.003238		4	GSA-rs6811613	5197842	G	ADD	-0.1278	-2.969	0.003166
10	rs10762417	72786849	A	0.1252	0.04228	0.04235	0.2081	2.962	0.003238		5	GSA-rs6890950	135261332	A	ADD	0.1277	2.969	0.003166
12	rs73368744	95323865	C	0.1246	0.04209	0.04215	0.2071	2.961	0.00324		16	rs2072042	1036640	A	ADD	0.1268	2.969	0.003166
6	rs9275334	32667107	G	-0.1237	0.04177	-0.2056	-0.04182	-2.961	0.003244		11	rs60836767	18736571	A	ADD	-0.1273	-2.968	0.00317
11	rs7110535	131486334	G	0.1243	0.04199	0.04203	0.2066	2.961	0.003244		5	rs7718156	172096366	A	ADD	0.1268	2.967	0.003179
2	GSA-rs485094	169782353	A	0.126	0.04257	0.04261	0.2095	2.961	0.003245		10	rs6593482	45868449	A	ADD	-0.1264	-2.967	0.003181
14	rs2195585	80852453	A	-0.127	0.04289	-0.2111	-0.04293	-2.961	0.003246		1	rs4240951	105743667	G	ADD	0.1303	2.967	0.003182
14	rs6572349	22736248	A	0.1244	0.04203	0.04206	0.2068	2.961	0.003247		8	rs10957078	60034329	A	ADD	-0.1266	-2.967	0.003188
3	GSA-rs14576	16268986	A	0.1234	0.0417	0.0417	0.2052	2.96	0.003254		1	rs821633	232148933	G	ADD	0.1275	2.966	0.003192
8	rs76394190	20426567	A	0.124	0.0419	0.0419	0.2061	2.96	0.003256		14	IlmnSeq_rs7148695	78717844	G	ADD	-0.1256	-2.966	0.003192
9	GSA-rs10511835	29958595	A	0.1262	0.04264	0.04262	0.2097	2.96	0.00326		14	rs7148695	78717844	G	ADD	-0.1256	-2.966	0.003192
13	rs308656	62702893	A	0.1256	0.04245	0.04243	0.2088	2.959	0.003261		23	rs5915766	4555871	A	ADD	0.1368	2.966	0.003192
19	rs35360071	14911318	G	0.1241	0.04194	0.04191	0.2063	2.959	0.003263		16	rs2241618	66547271	C	ADD	0.127	2.966	0.003194
15	GSA-rs3825804	72070005	A	-0.124	0.04191	-0.2062	-0.04188	-2.959	0.003264		2	rs41443147	148292182	G	ADD	0.1276	2.966	0.003196
12	rs1278604	133495537	A	0.1265	0.04276	0.04269	0.2103	2.958	0.003273		12	rs10744214	126018276	C	ADD	-0.1269	-2.966	0.003196
2	rs2354387	51940718	G	-0.1246	0.04213	-0.2072	-0.04206	-2.958	0.003274		17	rs4790811	1215221	C	ADD	0.1296	2.966	0.003196
2	rs6747216	183449785	G	0.1239	0.0419	0.0418	0.206	2.958	0.003279		15	rs1800588	58723675	G	ADD	0.1327	2.966	0.003198
19	rs62120362	18296566	G	-0.1261	0.04263	-0.2096	-0.04253	-2.958	0.003279		6	GSA-rs2983219	170559969	A	ADD	0.1266	2.965	0.003201
6	rs9275326	32666660	A	-0.1234	0.04173	-0.2052	-0.04161	-2.957	0.003285		5	rs56068216	97852867	C	ADD	0.126	2.965	0.003202
6	rs9275495	32673574	T	-0.1234	0.04173	-0.2052	-0.04161	-2.957	0.003285		19	rs321913	52808986	A	ADD	0.127	2.965	0.003204
6	rs9275530	32675523	C	-0.1234	0.04173	-0.2052	-0.04161	-2.957	0.003285		11	rs2162174	127940816	G	ADD	0.1286	2.964	0.003209
6	rs9275532	32675634	G	-0.1234	0.04173	-0.2052	-0.04161	-2.957	0.003285		3	rs898418	53702453	G	ADD	-0.1258	-2.964	0.003214
9	GSA-rs3983565	110973385	G	0.1249	0.04223	0.04209	0.2076	2.957	0.003291		11	rs752979	120608964	A	ADD	-0.1285	-2.964	0.003217
10	rs66807926	67078014	G	-0.1235	0.04178	-0.2054	-0.04164	-2.957	0.003293		21	GSA-rs458461	31129999	A	ADD	0.1269	2.963	0.00322
4	rs2198447	72398084	A	0.1239	0.0419	0.04173	0.206	2.956	0.003299		2	rs1160637	158885746	G	ADD	-0.1283	-2.963	0.003223
3	GSA-rs11926930	130147396	A	0.1245	0.04212	0.04195	0.2071	2.956	0.0033		23	JHU_X.127013887	127013888	A	ADD	0.1288	2.963	0.003227
10	rs11599298	72751229	G	0.1238	0.0419	0.04171	0.206	2.956	0.003301		12	rs12231982	128128048	G	ADD	0.1261	2.962	0.003229
5	rs1371370	124626392	G	0.1246	0.04218	0.04196	0.2073	2.955	0.003311		1	rs7525279	15745380	G	ADD	-0.127	-2.962	0.00323
9	GSA-rs16931419	132497550	G	0.1253	0.0424	0.04217	0.2084	2.954	0.003313		14	GSA-rs7155227	63365094	C	ADD	-0.1302	-2.962	0.003235
3	rs6795577	8693750	A	-0.1253	0.04242	-0.2085	-0.04216	-2.954	0.00332		1	rs1746927	64498297	A	ADD	0.1274	2.962	0.003237
11	IlmnSeq_rs2237892	2839751	A	-0.1267	0.0429	-0.2108	-0.04263	-2.954	0.003321		10	rs11186300	92514739	A	ADD	0.1275	2.961	0.003241
11	rs2237892	2839751	A	-0.1267	0.0429	-0.2108	-0.04263	-2.954	0.003321		15	GSA-rs745192	86123462	G	ADD	-0.1254	-2.961	0.003241
6	rs11153057	107649588	A	0.1246	0.04218	0.04191	0.2073	2.953	0.003323		18	rs28546289	2042253	A	ADD	-0.1268	-2.961	0.003244
1	rs3118644	156863043	G	-0.1238	0.04193	-0.206	-0.04163	-2.953	0.00333		11	rs2515350	58232813	A	ADD	0.1266	2.961	0.003248
2	GSA-rs6731864	179736006	C	0.1253	0.04243	0.04211	0.2084	2.952	0.003334		4	GSA-rs12640100	90634212	A	ADD	-0.127	-2.96	0.003258
14	rs870886	56418728	A	0.1259	0.04263	0.04231	0.2094	2.952	0.003334		12	rs1241224	116918119	A	ADD	-0.1257	-2.96	0.003259
2	IlmnSeq_rs496550	169779712	A	0.1245	0.04218	0.04185	0.2072	2.952	0.003335		2	rs9679549	40077971	G	ADD	-0.1262	-2.959	0.003261
2	rs496550	169779712	A	0.1245	0.04218	0.04185	0.2072	2.952	0.003335		18	rs564201	2224742	A	ADD	-0.1313	-2.959	0.003265
6	IlmnSeq_rs589955	169078281	A	0.127	0.04301	0.04266	0.2113	2.952	0.003342		23	rs5909103	19043329	A	ADD	-0.1339	-2.958	0.003271
9	GSA-rs2078432	3121992	A	0.1238	0.04194	0.04159	0.206	2.952	0.003342		11	rs17379654	103385445	G	ADD	0.1266	2.958	0.003278
12	rs1990313	4736086	G	0.1255	0.04252	0.04217	0.2088	2.952	0.003342		18	IlmnSeq_rs11081080	3954314	G	ADD	-0.126	-2.958	0.003279
4	GSA-rs363125	3189547	A	-0.124	0.04203	-0.2064	-0.04167	-2.951	0.003345		21	GSA-rs10482919	23197955	G	ADD	0.1264	2.958	0.00328
6	rs9391806	30227397	A	-0.1259	0.04265	-0.2095	-0.04228	-2.951	0.003347		8	GSA-rs2467179	76946010	G	ADD	0.1266	2.958	0.003281
11	rs72993012	98641626	A	0.1254	0.0425	0.04213	0.2087	2.951	0.003347		4	GSA-rs34377763	145548939	A	ADD	-0.1262	-2.957	0.003285
14	rs10142182	93006141	G	0.1241	0.04208	0.04168	0.2066	2.951	0.003354		7	rs34178185	40929623	A	ADD	-0.1265	-2.957	0.003286
1	rs2052959	68609491	C	0.1233	0.04178	0.04138	0.2052	2.95	0.003355		14	GSA-rs56020112	54306270	G	ADD	0.1259	2.957	0.003286
15	rs10152568	39160069	G	-0.124	0.04204	-0.2065	-0.04164	-2.95	0.003356		16	rs6499710	54692775	A	ADD	0.1268	2.957	0.003287
18	GSA-rs12455835	49952739	A	0.1241	0.04205	0.04165	0.2065	2.95	0.003356		7	GSA-rs35570237	155049106	A	ADD	-0.1265	-2.957	0.003291
7	rs12112961	13804535	G	-0.1235	0.04186	-0.2055	-0.04144	-2.95	0.00336		13	rs2649137	63179285	G	ADD	0.1271	2.956	0.003292
2	IlmnSeq_rs7570124	213319545	A	-0.1232	0.04177	-0.2051	-0.04131	-2.949	0.003371		6	rs6569759	132133116	G	ADD	0.1262	2.956	0.003297
2	rs7570124	213319545	A	-0.1232	0.04177	-0.2051	-0.04131	-2.949	0.003371		7	rs61518208	141183083	A	ADD	0.1264	2.956	0.003299
3	rs4831130	116039842	C	-0.1241	0.04207	-0.2065	-0.04162	-2.949	0.003371		8	rs13262016	118352994	G	ADD	-0.1258	-2.956	0.003299
5	rs12187097	2202172	A	-0.1247	0.04229	-0.2076	-0.0418	-2.949	0.003375		23	rs204321	126171889	G	ADD	-0.1286	-2.956	0.0033
3	rs709519	107615040	G	0.125	0.0424	0.04191	0.2081	2.948	0.003377		2	GSA-rs77170604	99541476	A	ADD	-0.1267	-2.956	0.003301
6	rs56952844	161314382	G	-0.124	0.04205	-0.2064	-0.04157	-2.948	0.003377		9	GSA-rs10961689	14737506	A	ADD	0.1256	2.955	0.003305
3	rs41347750	29246192	A	0.1241	0.0421	0.04157	0.2066	2.947	0.00339		2	rs979043	67566281	A	ADD	0.1255	2.955	0.003306
13	rs11841518	62671407	G	-0.1244	0.0422	-0.2071	-0.04166	-2.947	0.003392		7	rs55674993	138037398	G	ADD	-0.1257	-2.955	0.00331
2	rs2074954	158991525	C	-0.1237	0.04197	-0.206	-0.04142	-2.947	0.003394		20	rs237723	47935667	G	ADD	-0.1265	-2.954	0.003321
14	IlmnSeq_rs77549780	21647765	G	-0.137	0.04648	-0.2281	-0.04586	-2.947	0.003394		8	rs2062375	119977792	G	ADD	0.126	2.953	0.003333
9	GSA-rs13299557	111986960	G	-0.1259	0.04272	-0.2096	-0.04214	-2.947	0.003397		8	GSA-rs73713420	142685979	G	ADD	0.1262	2.952	0.003334
5	rs7712253	29269294	A	0.1239	0.04206	0.04149	0.2064	2.946	0.003398		6	rs9483910	136480972	A	ADD	-0.1265	-2.952	0.003335
8	rs6469096	108079600	A	-0.124	0.0421	-0.2065	-0.04152	-2.946	0.0034		20	rs6100805	58809513	C	ADD	0.1267	2.952	0.003336
17	GSA-rs2586074	55899762	A	-0.1259	0.04273	-0.2096	-0.04213	-2.946	0.003404		23	exm1635875	45051111	G	ADD	0.1318	2.952	0.003337
8	rs17635919	91551562	A	0.1248	0.04238	0.04178	0.2079	2.946	0.003405		23	rs5939926	93497502	A	ADD	-0.1316	-2.952	0.003342
15	rs12440518	53027640	A	0.1238	0.04204	0.04144	0.2062	2.946	0.003405		1	GSA-rs821634	232149520	A	ADD	0.1271	2.951	0.003345
17	GSA-rs9897452	27781594	G	-0.1245	0.04227	-0.2074	-0.04168	-2.946	0.003406		21	rs2838726	46315091	A	ADD	0.1285	2.95	0.003359
23	rs7473093	30095893	A	-0.1246	0.04229	-0.2074	-0.04168	-2.945	0.003409		14	rs8020349	28486535	A	ADD	0.125	2.95	0.003363
4	rs11938619	122161207	A	0.1228	0.04168	0.04107	0.2045	2.945	0.003411		7	rs10269852	152799545	A	ADD	0.1252	2.949	0.003367
1	rs1778013	87554612	A	0.1234	0.04189	0.04125	0.2055	2.945	0.003416		5	GSA-rs10057544	98554365	A	ADD	0.1259	2.949	0.003369
8	rs2719387	55204823	G	0.1236	0.04199	0.04135	0.2059	2.945	0.003416		12	rs7134594	110000193	A	ADD	-0.1252	-2.949	0.003372
4	IlmnSeq_rs11934097	102818067	A	-0.1255	0.04263	-0.2091	-0.04198	-2.945	0.003418		11	rs4944788	87646317	A	ADD	-0.1271	-2.948	0.003377
8	GSA-rs2468147	119161008	A	0.1279	0.04344	0.04277	0.2131	2.945	0.003418		1	rs6665380	88233770	G	ADD	-0.1255	-2.948	0.003379
12	rs1700159	52305786	A	0.1284	0.04362	0.04295	0.2139	2.944	0.003419		2	GSA-rs831004	170135742	G	ADD	-0.1264	-2.948	0.003379
5	rs2041064	136189846	A	0.1244	0.04223	0.04158	0.2071	2.944	0.00342		22	rs12628403	39358037	C	ADD	0.1264	2.948	0.00338
15	rs55917611	40603259	G	0.1292	0.04388	0.0432	0.2152	2.944	0.00342		18	IlmnSeq_rs9965624	65462845	A	ADD	0.1252	2.948	0.003381
3	rs7629273	11836386	A	0.1274	0.04327	0.04257	0.2122	2.944	0.003426		18	GSA-rs9965624	65462845	A	ADD	0.1252	2.948	0.003381
11	rs7104498	64266244	A	0.1232	0.04185	0.04116	0.2052	2.943	0.003432		17	rs9909270	14919081	G	ADD	0.1253	2.948	0.003388
1	rs10918127	165111608	G	-0.1243	0.04222	-0.207	-0.04152	-2.943	0.003433		11	GSA-rs72881143	24075078	G	ADD	-0.1261	-2.947	0.00339
7	GSA-rs4716504	157621069	A	-0.123	0.04181	-0.205	-0.0411	-2.943	0.003436		21	rs400140	46535814	A	ADD	0.1279	2.947	0.003395
8	rs4736890	40791773	A	-0.1248	0.04241	-0.2079	-0.04169	-2.943	0.003436		8	rs2252723	81953564	G	ADD	0.1273	2.947	0.003396
12	GSA-rs79396123	95331392	C	0.1239	0.0421	0.04137	0.2064	2.943	0.00344		10	rs3912390	82776591	A	ADD	-0.1269	-2.946	0.003402
1	rs185580	182519861	A	0.1256	0.0427	0.04194	0.2093	2.942	0.003443		15	IlmnSeq_rs3825885	88602841	G	ADD	-0.1277	-2.946	0.003403
11	GSA-rs11227227	65339378	A	0.1239	0.04211	0.04135	0.2064	2.942	0.003446		15	rs3825885	88602841	G	ADD	-0.1277	-2.946	0.003403
6	rs9391679	30228652	A	-0.1262	0.04289	-0.2103	-0.04213	-2.942	0.003448		3	rs1567734	86294252	A	ADD	0.1262	2.946	0.003407
20	rs3212183	43035138	G	-0.1238	0.04208	-0.2063	-0.0413	-2.941	0.003452		1	rs6658308	238654555	A	ADD	-0.1266	-2.945	0.00341
8	GSA-rs609792	9819890	A	-0.1252	0.04257	-0.2086	-0.04177	-2.941	0.003453		12	rs12319783	102322942	A	ADD	0.1263	2.945	0.003412
12	rs247362	14883331	G	-0.1247	0.0424	-0.2078	-0.04162	-2.942	0.003454		23	JHU_X.114286679	114286680	A	ADD	0.1292	2.945	0.003417
7	rs4272	92236829	G	-0.1233	0.04192	-0.2055	-0.04113	-2.941	0.003456		2	rs4668124	170066977	A	ADD	-0.125	-2.945	0.003418
19	GSA-rs1386502	44293356	G	0.1239	0.04212	0.04133	0.2064	2.941	0.003456		1	rs12059226	209906675	G	ADD	0.1255	2.944	0.003419
18	rs1154742	51390033	G	0.1244	0.04232	0.0415	0.2074	2.941	0.003462		19	rs62119671	39818278	G	ADD	0.1248	2.945	0.003419
17	rs12450373	32783283	A	0.1234	0.04196	0.04113	0.2056	2.94	0.003466		3	GSA-rs3773573	55033713	A	ADD	-0.1256	-2.944	0.003422
21	GSA-rs2212507	31719836	A	0.1234	0.04197	0.04114	0.2056	2.94	0.003466		15	rs6576443	25894658	A	ADD	0.1255	2.944	0.003422
17	rs228289	36926731	C	-0.1251	0.04255	-0.2085	-0.04168	-2.939	0.003475		23	rs113280960	69315391	A	ADD	0.1315	2.943	0.003431
6	rs2057727	30297529	A	0.1238	0.04211	0.04124	0.2063	2.939	0.003476		7	rs13232937	138079079	A	ADD	-0.1253	-2.942	0.003441
6	rs9368628	30238559	G	-0.1254	0.04266	-0.209	-0.04176	-2.939	0.00348		18	rs8094952	25206732	A	ADD	-0.125	-2.942	0.003441
6	rs9357095	30242128	G	-0.1254	0.04266	-0.209	-0.04176	-2.939	0.00348		16	GSA-rs4238593	20314682	A	ADD	-0.1267	-2.942	0.003442
6	rs9295844	30281402	C	-0.1254	0.04266	-0.209	-0.04176	-2.939	0.00348		19	IlmnSeq_rs1871047	45351746	G	ADD	0.1246	2.942	0.003442
10	rs17347867	7673498	C	-0.1248	0.04248	-0.2081	-0.04157	-2.939	0.003483		1	rs3131323	177719196	A	ADD	0.125	2.942	0.00345
11	rs10834664	25396639	A	0.1273	0.04332	0.04239	0.2122	2.938	0.003485		19	rs112840592	1722121	A	ADD	0.1252	2.942	0.00345
13	rs2184180	79380816	A	0.127	0.04322	0.04228	0.2117	2.938	0.003488		4	rs4557343	70350006	C	ADD	-0.1255	-2.941	0.003459
2	rs6755594	46589295	G	0.1232	0.04194	0.04101	0.2054	2.938	0.003492		19	rs78072814	14482149	C	ADD	0.128	2.941	0.00346
1	rs114279996	65656133	A	-0.1285	0.04374	-0.2142	-0.04275	-2.937	0.003497		6	GSA-rs1328892	83598857	G	ADD	-0.1279	-2.94	0.003465
8	GSA-rs11203790	16377775	G	-0.1245	0.04239	-0.2076	-0.04142	-2.937	0.003499		11	rs10789798	110723547	G	ADD	0.1258	2.94	0.003469
8	IlmnSeq_rs2954029	126490972	T	-0.1245	0.04238	-0.2076	-0.04141	-2.937	0.003502		10	rs12266210	55188322	A	ADD	0.1315	2.94	0.00347
8	rs2954029	126490972	T	-0.1245	0.04238	-0.2076	-0.04141	-2.937	0.003502		1	rs573657	76697767	G	ADD	0.127	2.94	0.003472
1	rs12059226	209906675	G	0.1233	0.04198	0.041	0.2056	2.937	0.003505		12	rs7312112	103046823	C	ADD	0.1262	2.94	0.003472
7	rs77224425	36087216	G	0.1239	0.04218	0.04118	0.2065	2.936	0.003508		2	rs3771257	20404762	G	ADD	-0.1269	-2.939	0.003478
3	rs9860012	126158080	G	-0.1248	0.04252	-0.2082	-0.0415	-2.936	0.003511		12	rs10850808	117737677	G	ADD	0.1257	2.939	0.003481
5	rs4836300	126214855	G	0.1257	0.04281	0.04179	0.2096	2.936	0.003512		6	GSA-rs6455946	164938308	A	ADD	-0.1255	-2.939	0.003483
2	rs2122013	177365599	A	0.1297	0.04418	0.0431	0.2163	2.936	0.003516		5	rs10514254	82633951	A	ADD	0.1257	2.938	0.003493
23	rs4844080	148066431	A	0.1257	0.04281	0.04176	0.2096	2.936	0.003517		14	rs4058349	21646942	G	ADD	-0.1357	-2.938	0.003493
5	rs13182649	12698832	G	-0.1241	0.04229	-0.207	-0.04125	-2.935	0.003519		9	GSA-rs2208707	10649660	G	ADD	0.1288	2.938	0.003495
2	GSA-rs10496681	130683532	A	-0.1237	0.04214	-0.2063	-0.0411	-2.935	0.00352		1	rs61032551	7510062	G	ADD	0.1316	2.937	0.003497
6	rs2749250	168905499	G	-0.1277	0.0435	-0.213	-0.04243	-2.935	0.00352		2	IlmnSeq_rs754523	21311691	G	ADD	0.1262	2.937	0.003498
5	rs10053041	121018550	G	0.1279	0.04358	0.04251	0.2133	2.935	0.003521		2	GSA-rs56079819	21314851	A	ADD	0.1262	2.937	0.003498
23	rs2076790	142596406	G	0.1287	0.04384	0.04275	0.2146	2.935	0.003521		2	rs10497564	181086493	A	ADD	-0.1245	-2.936	0.003509
13	rs1125434	31427259	A	-0.1232	0.042	-0.2056	-0.04093	-2.935	0.003527		2	rs13022378	202954511	A	ADD	-0.125	-2.936	0.00351
7	GSA-rs35272066	97874693	A	0.1233	0.04201	0.04093	0.2056	2.934	0.00353		11	rs10894351	131106856	A	ADD	0.1254	2.936	0.003512
13	rs17087708	65061550	G	-0.1258	0.04288	-0.2099	-0.04179	-2.934	0.003532		21	rs2822999	16364756	C	ADD	0.1256	2.935	0.003521
1	rs1622146	231579172	G	-0.1238	0.0422	-0.2065	-0.04111	-2.934	0.003534		23	kgp22804142	22892801	G	ADD	0.1268	2.935	0.003521
10	rs56353338	123910243	A	-0.1236	0.04214	-0.2062	-0.04103	-2.934	0.003539		7	rs10777	15651158	C	ADD	-0.1246	-2.935	0.003522
4	rs321723	92845437	G	-0.1238	0.0422	-0.2065	-0.04106	-2.933	0.003548		4	GSA-rs10517287	33624702	A	ADD	-0.1295	-2.935	0.003524
12	exm2271871	114646834	A	-0.123	0.04197	-0.2053	-0.04077	-2.931	0.003563		16	rs3112740	7836297	A	ADD	-0.1246	-2.935	0.003524
1	GSA-rs78630019	210882597	A	0.1264	0.04313	0.04189	0.211	2.931	0.003567		20	IlmnSeq_rs77470078	54090914	T	ADD	0.1289	2.935	0.003525
4	rs4317189	23495538	A	0.1234	0.0421	0.04087	0.2059	2.931	0.003571		20	IlmnSeq_rs2870633	54091282	A	ADD	0.1289	2.935	0.003525
5	rs10043030	159936536	A	-0.1232	0.04202	-0.2055	-0.04079	-2.931	0.003573		19	rs4807953	1720332	G	ADD	0.1251	2.935	0.003527
12	rs2657309	116924079	G	0.1294	0.04416	0.04286	0.2159	2.931	0.003573		20	rs13039035	12133935	G	ADD	0.1289	2.934	0.003534
1	rs12128508	165174791	A	-0.1295	0.04421	-0.2162	-0.04289	-2.93	0.003579		18	rs111423416	25230171	C	ADD	0.125	2.934	0.003536
3	rs11710076	28014302	G	0.1247	0.04256	0.04128	0.2081	2.93	0.00358		3	rs6776532	147662460	G	ADD	-0.1264	-2.934	0.003538
6	rs1611715	29829482	C	-0.1243	0.04243	-0.2075	-0.04115	-2.93	0.003581		14	GSA-rs1467573	65347583	A	ADD	0.1245	2.934	0.003538
16	rs9929491	7767262	G	0.1222	0.0417	0.04044	0.2039	2.93	0.003582		7	rs985238	42767097	A	ADD	0.1248	2.933	0.003541
3	rs6765044	75388161	G	0.1237	0.04222	0.04092	0.2064	2.929	0.003587		9	GSA-rs13440434	132914006	G	ADD	-0.1249	-2.933	0.003542
21	rs28708536	43244905	A	-0.1233	0.04209	-0.2058	-0.0408	-2.929	0.003591		2	rs6720487	221052193	G	ADD	-0.125	-2.933	0.003543
18	rs949233	12053552	G	0.1252	0.04275	0.04142	0.209	2.929	0.003593		9	IlmnSeq_rs7022225	112536455	C	ADD	-0.1289	-2.933	0.003544
1	rs7524868	41106774	C	0.1227	0.0419	0.04058	0.2048	2.928	0.003597		9	GSA-rs7022225	112536455	C	ADD	-0.1289	-2.933	0.003544
1	rs10494197	117635905	A	-0.1221	0.0417	-0.2038	-0.04037	-2.928	0.003602		8	rs7825340	128109129	G	ADD	-0.1248	-2.933	0.003547
14	rs3803304	105239146	C	0.1225	0.04184	0.0405	0.2045	2.928	0.003602		23	JHU_X.69351602	69351603	G	ADD	-0.1324	-2.933	0.003547
10	rs12249222	49406469	A	0.1238	0.04228	0.0409	0.2066	2.927	0.003608		3	GSA-rs13078193	173716814	G	ADD	-0.1287	-2.933	0.003549
12	GSA-rs11609325	128850734	A	-0.1262	0.04309	-0.2106	-0.0417	-2.928	0.003608		2	GSA-rs1250233	216307103	G	ADD	-0.1274	-2.932	0.003551
2	rs6545459	55150611	G	-0.1235	0.04221	-0.2063	-0.04082	-2.927	0.003613		3	rs1881969	163525723	A	ADD	0.1252	2.932	0.003552
6	GSA-rs12527349	110724928	G	0.1254	0.04283	0.04142	0.2093	2.927	0.003613		6	rs2849015	32198936	A	ADD	-0.1253	-2.932	0.003555
1	rs1800672	227085462	G	0.1227	0.04192	0.04053	0.2048	2.927	0.003615		19	GSA-rs10500226	28387782	C	ADD	0.1245	2.932	0.003558
11	GSA-rs7946098	97851666	G	0.1301	0.04444	0.04296	0.2171	2.927	0.003616		1	GSA-rs12403346	240620371	G	ADD	-0.1248	-2.932	0.003561
7	rs2735769	152945148	A	-0.1232	0.04208	-0.2056	-0.04068	-2.927	0.003618		14	GSA-rs77488561	22518515	G	ADD	0.1248	2.931	0.003562
19	GSA-rs1816412	24058196	A	-0.1255	0.04288	-0.2095	-0.04143	-2.926	0.003622		19	GSA-rs1971206	11559696	A	ADD	-0.1244	-2.931	0.003568
8	GSA-rs79777286	140104843	A	-0.123	0.04204	-0.2054	-0.04062	-2.926	0.003624		11	rs10833509	21355150	A	ADD	-0.125	-2.931	0.003569
1	rs636764	219054054	G	-0.1232	0.04211	-0.2058	-0.04068	-2.926	0.003627		18	rs4257310	58535482	A	ADD	-0.1268	-2.931	0.003573
1	rs12035823	102995218	G	0.1242	0.04246	0.04096	0.2074	2.925	0.003638		11	rs527628	97892938	G	ADD	0.133	2.93	0.003577
19	rs71351741	34246133	A	-0.1224	0.04185	-0.2044	-0.04038	-2.925	0.003638		6	GSA-rs9383007	14999405	G	ADD	0.1256	2.93	0.003579
10	GSA-rs75592601	30854024	G	0.1232	0.04212	0.04063	0.2057	2.925	0.003641		2	rs13018109	180139951	G	ADD	-0.1249	-2.929	0.003588
2	rs6751887	143227120	G	0.1256	0.04295	0.0414	0.2097	2.924	0.003648		5	rs17667423	168555912	A	ADD	0.1255	2.929	0.003591
22	GSA-rs13053621	45457915	A	-0.1223	0.04184	-0.2044	-0.04034	-2.924	0.003648		12	GSA-rs1380008	114455875	G	ADD	-0.1265	-2.929	0.003592
6	chr6:29916618	29916618	A	0.1228	0.04201	0.04046	0.2051	2.923	0.003658		23	JHU_X.85925135	85925136	T	ADD	-0.1267	-2.929	0.003592
15	GSA-rs16942267	89371811	G	-0.1234	0.0422	-0.2061	-0.04064	-2.923	0.00366		6	rs9404492	104356232	A	ADD	0.1248	2.928	0.003597
12	GSA-rs11067130	114906528	C	0.1258	0.04305	0.04144	0.2102	2.923	0.003663		8	rs7837548	61802242	A	ADD	0.1263	2.928	0.003599
1	rs2256956	182319935	G	0.1242	0.04251	0.04092	0.2076	2.923	0.003664		7	rs765764	80508422	G	ADD	-0.1245	-2.928	0.003601
11	rs108499	61547237	G	-0.1322	0.04523	-0.2208	-0.04352	-2.922	0.003668		9	GSA-rs72735419	84395961	A	ADD	0.1281	2.928	0.003604
2	rs938326	1401781	G	0.1229	0.04207	0.04048	0.2054	2.922	0.003669		1	IlmnSeq_rs821634	232149520	A	ADD	0.1258	2.928	0.003605
13	GSA-rs330563	111290880	G	-0.1262	0.0432	-0.2109	-0.04156	-2.922	0.003671		6	GSA-rs143625489	88090982	C	ADD	0.1267	2.928	0.003606
6	rs1264709	30056476	T	0.1227	0.04199	0.04039	0.205	2.922	0.003674		15	rs17228592	32986371	G	ADD	0.1241	2.927	0.003608
1	rs6665380	88233770	G	-0.1227	0.042	-0.205	-0.04039	-2.922	0.003676		5	GSA-rs72751150	21033450	A	ADD	0.1261	2.927	0.003612
1	GSA-rs12097144	166483531	G	0.1336	0.04573	0.04396	0.2232	2.921	0.00368		10	IlmnSeq_rs17221309	615782	A	ADD	-0.1253	-2.927	0.003614
20	GSA-rs6138248	24227140	A	-0.1223	0.04186	-0.2043	-0.04023	-2.921	0.003681		10	rs7069535	101138526	C	ADD	0.1264	2.926	0.00362
7	rs6979947	157005863	G	-0.1231	0.04215	-0.2057	-0.0405	-2.921	0.003683		6	rs2051597	32709370	A	ADD	-0.1256	-2.926	0.003625
6	rs6927022	32612397	A	0.1263	0.04325	0.04156	0.2111	2.921	0.003684		16	rs7200665	47276881	A	ADD	-0.1289	-2.926	0.003627
1	rs12142154	92043609	C	-0.1234	0.04225	-0.2062	-0.04059	-2.921	0.003686		15	GSA-rs338518	86215194	A	ADD	-0.1238	-2.925	0.003632
2	rs78716988	201022713	A	-0.1236	0.04233	-0.2066	-0.04065	-2.92	0.00369		14	GSA-rs17096594	30841107	A	ADD	-0.1246	-2.925	0.003633
20	rs4396773	50008792	A	-0.1218	0.04172	-0.2036	-0.04006	-2.92	0.003691		8	rs2614072	28166289	A	ADD	0.1251	2.925	0.003636
12	rs7297453	13582526	A	-0.1223	0.04188	-0.2044	-0.0402	-2.92	0.003695		10	rs2505963	27160932	G	ADD	0.1245	2.925	0.003637
12	rs1489427	129196834	A	0.122	0.04178	0.04007	0.2038	2.919	0.003706		8	rs68170294	56068770	A	ADD	0.1253	2.924	0.003642
20	GSA-rs2143543	17806483	A	0.122	0.04178	0.04007	0.2038	2.919	0.003706		15	rs2059637	26677809	G	ADD	0.1243	2.924	0.003644
4	rs6850341	7390741	A	-0.1242	0.04256	-0.2076	-0.0408	-2.919	0.00371		4	rs2419793	133632428	G	ADD	0.1267	2.924	0.003651
13	rs1890882	47971698	G	-0.1223	0.04191	-0.2045	-0.04018	-2.919	0.003711		11	rs4944792	87649263	A	ADD	0.1249	2.923	0.003661
1	rs782207	72953251	A	0.1223	0.0419	0.04016	0.2044	2.919	0.003713		2	rs7574923	123797042	A	ADD	0.1245	2.923	0.003664
2	rs17629251	200848254	A	-0.1239	0.04248	-0.2072	-0.0407	-2.918	0.003715		3	rs35729033	55200868	A	ADD	-0.124	-2.922	0.003666
8	rs34241583	128070900	A	0.1248	0.04276	0.04098	0.2086	2.918	0.003716		12	GSA-rs10505994	26423929	A	ADD	-0.1321	-2.922	0.003668
5	rs7710874	29339392	A	0.1252	0.04293	0.0411	0.2094	2.917	0.003725		19	GSA-rs117225227	5678016	G	ADD	-0.1242	-2.922	0.003671
1	IlmnSeq_rs873989	58556598	G	0.1227	0.04206	0.04026	0.2051	2.917	0.003727		6	rs11962003	93890071	G	ADD	-0.1254	-2.922	0.003673
9	GSA-rs10965979	23625105	G	0.1221	0.04185	0.04005	0.2041	2.917	0.003728		16	rs74567770	60121676	G	ADD	-0.1243	-2.922	0.003674
7	GSA-rs17149630	126006996	A	-0.123	0.04218	-0.2057	-0.04036	-2.917	0.003731		4	rs2714555	37837819	G	ADD	-0.1252	-2.921	0.003676
8	rs16939634	79086584	A	0.1226	0.04206	0.04021	0.2051	2.916	0.003741		20	rs226665	24764183	A	ADD	0.1249	2.921	0.003679
1	GSA-rs16834283	236896506	A	0.1225	0.04201	0.04016	0.2048	2.916	0.003742		20	GSA-rs1051368	3764761	A	ADD	0.1252	2.921	0.003684
6	rs483574	32194956	A	-0.1223	0.04197	-0.2046	-0.04006	-2.914	0.003759		5	GSA-rs76048530	31688262	C	ADD	-0.1238	-2.92	0.003689
12	rs810947	28931965	G	-0.1242	0.04262	-0.2077	-0.04067	-2.914	0.003762		14	rs11625112	23596740	A	ADD	-0.1291	-2.92	0.00369
1	GSA-rs12046208	113171589	A	-0.1239	0.04251	-0.2072	-0.04056	-2.914	0.003763		20	rs2741523	43920446	A	ADD	0.1258	2.92	0.00369
12	rs12300161	114982163	A	-0.1226	0.04209	-0.2051	-0.04015	-2.914	0.003764		4	GSA-rs7692841	116588598	G	ADD	0.1308	2.92	0.003694
23	JHU_X.31837915	31837916	G	-0.1319	0.04526	-0.2206	-0.04317	-2.914	0.003766		17	rs8082305	30106587	A	ADD	0.1246	2.92	0.003695
11	rs11826145	134667681	G	-0.1236	0.04241	-0.2067	-0.04045	-2.914	0.003767		2	rs6548010	21277922	G	ADD	0.1257	2.92	0.003698
16	rs12597819	82893311	G	0.1234	0.04234	0.04037	0.2063	2.913	0.003771		11	rs71475090	112646277	A	ADD	-0.1263	-2.92	0.003699
6	rs1150739	30031345	G	0.122	0.04188	0.03992	0.2041	2.913	0.003774		10	rs4746828	70992250	A	ADD	0.1252	2.919	0.00371
6	rs2255071	132880648	A	-0.1224	0.04204	-0.2048	-0.04005	-2.913	0.003782		16	rs62026376	11228712	A	ADD	-0.1241	-2.918	0.003713
11	rs6483491	96000218	G	-0.1264	0.0434	-0.2115	-0.04134	-2.912	0.003782		18	rs978383	39421278	G	ADD	0.1242	2.918	0.003714
8	rs1557591	17303403	A	-0.1241	0.04261	-0.2076	-0.04058	-2.912	0.003784		1	GSA-rs7537070	210043565	A	ADD	-0.1261	-2.918	0.003715
5	rs13362118	159734986	C	-0.1221	0.04193	-0.2043	-0.03992	-2.912	0.003787		2	rs1505727	156312118	G	ADD	-0.1244	-2.918	0.003718
17	rs9895034	9613717	G	-0.1222	0.04196	-0.2044	-0.03994	-2.912	0.003788		8	rs1078363	21904212	A	ADD	0.1243	2.918	0.003718
19	rs6511789	12486228	A	-0.1223	0.04202	-0.2047	-0.03999	-2.912	0.003792		13	rs644631	32098486	G	ADD	-0.1282	-2.917	0.003725
1	GSA-rs56300375	202821425	A	0.1237	0.04248	0.04042	0.2069	2.911	0.003795		3	rs937907	130255483	A	ADD	0.1243	2.917	0.003726
1	rs867325	229545085	A	-0.1231	0.04227	-0.2059	-0.0402	-2.911	0.003802		20	IlmnSeq_rs1535213	14522894	G	ADD	-0.1235	-2.917	0.003727
5	rs12513800	53966360	A	-0.1233	0.04235	-0.2063	-0.04026	-2.911	0.003802		20	rs1535213	14522894	G	ADD	-0.1235	-2.917	0.003727
10	rs2073320	33553257	G	-0.1267	0.04353	-0.212	-0.04138	-2.911	0.003802		20	rs756529	48011008	A	ADD	-0.1244	-2.917	0.00373
23	rs3843841	69485529	A	0.1251	0.043	0.04087	0.2094	2.911	0.003805		3	IlmnSeq_rs6787150	6728385	G	ADD	-0.1238	-2.917	0.003733
10	rs12411286	8127475	G	0.1249	0.04293	0.0408	0.2091	2.91	0.003807		6	GSA-rs76642149	47403230	A	ADD	-0.1237	-2.916	0.003735
10	IlmnSeq_rs1467819	106409545	G	0.1256	0.04317	0.041	0.2102	2.91	0.003816		20	IlmnSeq_rs6034225	15579575	A	ADD	0.1247	2.916	0.003738
10	rs1467819	106409545	G	0.1256	0.04317	0.041	0.2102	2.91	0.003816		4	rs11734997	20931952	A	ADD	-0.1271	-2.916	0.003742
2	GSA-rs486981	169782149	A	0.1238	0.04255	0.0404	0.2072	2.909	0.003818		14	rs932726	97162436	A	ADD	0.1239	2.916	0.003742
2	rs10497775	196326799	A	-0.1239	0.0426	-0.2074	-0.04044	-2.909	0.003821		21	rs8133080	47573469	G	ADD	0.1275	2.916	0.003747
20	rs79300723	14688781	G	0.1213	0.04171	0.03958	0.2031	2.909	0.003823		12	rs34331166	45886165	A	ADD	0.1241	2.915	0.003748
3	rs3796176	1270698	G	-0.1247	0.04287	-0.2087	-0.04068	-2.909	0.003826		2	GSA-rs7607300	7331801	A	ADD	-0.1245	-2.915	0.003749
7	rs77514067	3045788	A	-0.1223	0.04205	-0.2047	-0.03989	-2.909	0.003827		3	GSA-rs4431091	5334775	G	ADD	0.1243	2.915	0.00375
22	rs801721	47081716	G	-0.1216	0.04181	-0.2035	-0.03964	-2.908	0.003835		5	rs4632823	121211925	A	ADD	0.1286	2.915	0.003757
6	rs2272887	136980134	G	-0.1222	0.04203	-0.2046	-0.03984	-2.908	0.003836		8	rs2242	455360	A	ADD	0.1235	2.914	0.003762
7	rs7779793	148030828	G	-0.1233	0.0424	-0.2064	-0.04019	-2.908	0.003837		17	rs8076343	36981872	G	ADD	-0.1245	-2.914	0.003762
2	rs13428444	34759502	A	-0.1226	0.04217	-0.2053	-0.03996	-2.908	0.003841		23	rs62594234	86183698	G	ADD	0.1274	2.914	0.003762
20	rs78490936	38618698	A	0.124	0.04264	0.04039	0.2075	2.907	0.003844		23	rs5908216	141270430	G	ADD	0.1309	2.914	0.003764
4	GSA-rs34208976	102790037	A	-0.1233	0.04241	-0.2064	-0.04017	-2.907	0.003847		14	IlmnSeq_rs7152665	33950855	A	ADD	0.125	2.914	0.003765
10	rs7906814	29759782	C	-0.1233	0.04242	-0.2064	-0.04016	-2.907	0.003851		9	GSA-rs35456336	2655702	G	ADD	-0.1247	-2.914	0.003766
15	rs12593361	53510372	A	0.1248	0.04295	0.04063	0.209	2.906	0.003862		13	rs9572019	69383059	A	ADD	-0.1245	-2.913	0.003772
1	seq-rs41265164	153520203	A	-0.1216	0.04186	-0.2036	-0.03956	-2.905	0.003869		10	rs6560859	954957	G	ADD	0.1239	2.913	0.003774
20	rs2426475	51865183	A	-0.1248	0.04295	-0.209	-0.0406	-2.905	0.003869		23	rs7064260	122764923	G	ADD	-0.1276	-2.913	0.003776
23	rs5908533	142164219	G	0.1233	0.04244	0.04011	0.2065	2.905	0.00387		20	rs2425895	45336587	A	ADD	0.1283	2.913	0.003777
1	rs10908753	160075437	C	0.122	0.04201	0.03969	0.2043	2.905	0.003876		2	rs13024390	71900805	A	ADD	0.1229	2.913	0.003778
23	rs5925760	23383444	A	-0.1252	0.04312	-0.2097	-0.04072	-2.904	0.003878		12	IlmnSeq_rs1964565	129818338	A	ADD	-0.1244	-2.913	0.003778
2	rs1545133	113309473	A	-0.1225	0.04217	-0.2051	-0.03981	-2.904	0.003883		3	IlmnSeq_rs191927	60051071	A	ADD	0.1272	2.913	0.00378
1	rs7526759	237446556	A	0.1217	0.0419	0.03954	0.2038	2.904	0.003888		3	rs191927	60051071	A	ADD	0.1272	2.913	0.00378
12	rs7963799	22313448	A	0.1267	0.04366	0.04119	0.2123	2.903	0.003891		21	rs2834287	35260961	G	ADD	-0.1235	-2.912	0.003783
3	IlmnSeq_rs2064020	60138099	A	0.1214	0.04183	0.03946	0.2034	2.903	0.003892		6	rs9392985	8266826	A	ADD	-0.1241	-2.912	0.003786
14	rs7155927	22730981	G	0.122	0.04201	0.03962	0.2043	2.903	0.003896		23	JHU_X.45124547	45124548	G	ADD	0.126	2.912	0.003788
2	rs17662626	193984621	G	-0.1242	0.04277	-0.208	-0.04033	-2.903	0.003898		5	rs10053041	121018550	G	ADD	0.1285	2.912	0.003789
2	GSA-rs7560943	183490198	A	0.126	0.04341	0.04092	0.2111	2.903	0.0039		1	rs10753501	20758192	A	ADD	0.1234	2.911	0.003799
16	rs74031733	85250570	A	-0.1224	0.04216	-0.205	-0.03975	-2.903	0.0039		23	rs5906955	44279493	A	ADD	-0.1251	-2.911	0.003801
19	rs11879355	44306482	A	0.1229	0.04233	0.03991	0.2058	2.903	0.0039		11	rs11820274	87610217	A	ADD	0.1279	2.911	0.003803
16	GSA-rs12708990	57640552	G	0.1225	0.0422	0.03976	0.2052	2.902	0.003906		1	rs705203	34839501	G	ADD	-0.1235	-2.911	0.003806
2	GSA-rs28701644	83680589	A	0.1228	0.04232	0.03986	0.2057	2.902	0.003908		3	rs28429434	25535752	A	ADD	-0.1239	-2.91	0.003806
8	rs55694640	41649439	A	-0.1221	0.04207	-0.2045	-0.03962	-2.902	0.00391		8	rs24178	53342536	A	ADD	-0.1235	-2.91	0.003813
1	rs28551053	188643256	A	0.1229	0.04236	0.03989	0.2059	2.902	0.003912		9	rs885518	21830157	G	ADD	-0.1247	-2.909	0.003822
13	IlmnSeq_rs1924590	97421345	G	0.1231	0.04241	0.03994	0.2062	2.902	0.003913		9	GSA-rs1410856	93033040	G	ADD	0.1241	2.909	0.003825
2	IlmnSeq_rs497692	169789016	A	0.1226	0.04225	0.03975	0.2054	2.901	0.003921		14	rs7161116	57309063	G	ADD	-0.1289	-2.909	0.003826
9	GSA-rs1169884	91032911	G	0.1228	0.04233	0.03983	0.2058	2.901	0.003921		9	GSA-rs12348904	10879071	C	ADD	0.1267	2.908	0.003832
1	rs1061337	76227022	G	0.1222	0.04213	0.03964	0.2048	2.901	0.003922		12	rs11045585	21045694	G	ADD	-0.1234	-2.908	0.00384
9	GSA-rs12551356	77313196	A	0.1213	0.04181	0.03933	0.2032	2.901	0.003923		17	rs228289	36926731	C	ADD	-0.1257	-2.908	0.003841
2	rs1836524	163504609	A	0.1231	0.04244	0.03992	0.2063	2.901	0.003926		11	IlmnSeq_rs4757226	14134514	C	ADD	0.1253	2.907	0.003842
2	rs10931910	201523736	A	0.1221	0.0421	0.03959	0.2046	2.901	0.003926		2	GSA-rs62122515	21295227	A	ADD	0.125	2.907	0.003843
6	rs6913008	32974843	A	0.1225	0.04223	0.03972	0.2052	2.901	0.003926		11	rs11263536	69533579	A	ADD	0.1246	2.907	0.003846
19	rs4806871	2635059	G	0.1232	0.0425	0.03996	0.2065	2.9	0.00393		4	rs12508530	31366651	A	ADD	0.1267	2.907	0.003849
1	rs10493052	33945685	A	0.1229	0.04241	0.03981	0.2061	2.899	0.00395		14	rs8008466	94862149	G	ADD	0.1277	2.907	0.003851
3	GSA-rs1062246	11080169	G	0.1212	0.0418	0.03923	0.2031	2.899	0.00395		13	rs9575979	36929986	A	ADD	-0.124	-2.907	0.003853
21	rs73660	18802992	G	-0.1212	0.04183	-0.2032	-0.03926	-2.899	0.003951		18	rs1431790	49892325	G	ADD	0.1263	2.906	0.003861
23	rs7057641	22861552	C	0.123	0.04245	0.03984	0.2063	2.898	0.003951		7	rs2192597	8995694	G	ADD	-0.1235	-2.905	0.003867
13	rs17326362	47898029	A	0.1211	0.04179	0.03921	0.203	2.898	0.003952		1	rs4462114	215862637	A	ADD	0.1239	2.905	0.003872
14	GSA-rs12436623	45632340	A	-0.1225	0.04226	-0.2053	-0.03966	-2.898	0.003953		9	GSA-rs629406	135871519	A	ADD	-0.1238	-2.905	0.003873
12	rs10850390	115313527	A	0.1234	0.04258	0.03994	0.2068	2.898	0.003955		12	rs4762062	52589512	A	ADD	0.1248	2.905	0.003873
8	IlmnSeq_rs4733272	31612816	G	0.1214	0.04188	0.03929	0.2035	2.898	0.003956		7	rs2091203	51513864	A	ADD	0.1239	2.905	0.003874
2	rs6712892	75991456	A	0.1212	0.04183	0.03923	0.2032	2.898	0.003957		15	rs8032832	93158095	A	ADD	0.1268	2.905	0.003874
10	rs703022	28624166	A	0.1223	0.04221	0.0396	0.205	2.898	0.003957		3	rs7632942	146622509	G	ADD	0.1252	2.905	0.003875
22	rs78997815	39353184	C	-0.1216	0.04198	-0.2039	-0.03937	-2.898	0.003958		10	IlmnSeq_rs11006923	28504944	G	ADD	0.1243	2.904	0.003879
1	rs28707122	92367830	C	0.1227	0.04235	0.03971	0.2057	2.898	0.003964		16	rs5027120	48885985	C	ADD	-0.1277	-2.904	0.003888
7	rs10261098	155527704	A	-0.122	0.0421	-0.2045	-0.03944	-2.897	0.003973		20	rs6516034	5414546	A	ADD	0.1238	2.904	0.00389
14	rs2256270	58471289	G	0.1219	0.0421	0.03942	0.2045	2.896	0.003979		4	rs1134921	843508	A	ADD	-0.1265	-2.903	0.003893
17	rs61687889	64752512	A	0.121	0.04178	0.0391	0.2029	2.896	0.003985		1	rs11810140	238690302	G	ADD	-0.1236	-2.903	0.003894
2	rs6751378	78102968	A	-0.1252	0.04322	-0.2099	-0.04046	-2.896	0.003986		14	IlmnSeq_rs8004456	92997183	A	ADD	-0.124	-2.903	0.003901
9	GSA-rs7047997	5703394	G	-0.121	0.0418	-0.203	-0.0391	-2.895	0.003991		9	IlmnSeq_rs2073478	38396065	A	ADD	0.1274	2.901	0.003918
6	rs412657	32211085	C	0.1208	0.04171	0.03901	0.2025	2.895	0.003993		9	INMG_09369	38396065	A	ADD	0.1274	2.901	0.003918
5	rs62371867	81975461	G	0.1238	0.04278	0.03999	0.2077	2.895	0.003998		9	GSA-rs2073478	38396065	A	ADD	0.1274	2.901	0.003918
7	GSA-rs6464561	143623546	A	0.123	0.04251	0.03973	0.2064	2.895	0.004		1	rs12086634	209880259	C	ADD	0.1236	2.901	0.003919
17	GSA-rs79265302	75187437	G	0.1229	0.04247	0.03969	0.2061	2.895	0.004		10	GSA-rs4919217	100111326	G	ADD	0.124	2.901	0.003926
2	JHU_2.127422037	127422038	G	0.124	0.04283	0.04001	0.2079	2.894	0.004005		14	rs12889199	52346962	G	ADD	0.125	2.9	0.00393
6	rs9366755	30286729	A	-0.1237	0.04274	-0.2074	-0.03992	-2.894	0.004007		11	rs11026076	21436232	G	ADD	0.1268	2.9	0.003931
2	GSA-rs12618871	179733594	C	0.1319	0.04557	0.04255	0.2212	2.894	0.004009		7	rs6466817	122021647	G	ADD	0.1234	2.9	0.003932
14	rs7150691	22730510	G	0.1217	0.04206	0.03925	0.2041	2.893	0.004018		9	GSA-rs10967234	26210446	A	ADD	-0.1242	-2.9	0.003934
6	rs2844765	30234494	G	-0.1225	0.04234	-0.2055	-0.0395	-2.893	0.00402		12	rs4760673	48356109	G	ADD	0.1267	2.899	0.003949
6	rs2844763	30235184	A	-0.1225	0.04234	-0.2055	-0.0395	-2.893	0.00402		12	rs2909075	22263219	G	ADD	-0.1269	-2.898	0.003953
6	rs2844761	30237454	G	-0.1225	0.04234	-0.2055	-0.0395	-2.893	0.00402		13	rs7987982	110931311	G	ADD	0.1276	2.898	0.003955
6	rs1045251	30259657	A	-0.1225	0.04234	-0.2055	-0.0395	-2.893	0.00402		5	rs6449558	61085552	A	ADD	0.1228	2.898	0.003956
6	rs261948	30270609	A	-0.1225	0.04234	-0.2055	-0.0395	-2.893	0.00402		10	rs7897040	93364797	A	ADD	0.1267	2.898	0.003957
6	rs9394001	30282644	T	-0.1225	0.04234	-0.2055	-0.0395	-2.893	0.00402		5	rs4868974	165752915	A	ADD	0.1246	2.898	0.003963
6	rs6912495	30284051	G	-0.1225	0.04234	-0.2055	-0.0395	-2.893	0.00402		10	rs2271126	62671305	A	ADD	-0.1232	-2.898	0.003963
6	rs1473102	30285405	A	-0.1225	0.04234	-0.2055	-0.0395	-2.893	0.00402		12	rs1964565	129818338	A	ADD	-0.1248	-2.897	0.003971
6	rs28360023	30288924	G	-0.1225	0.04234	-0.2055	-0.0395	-2.893	0.00402		10	rs11006995	28585496	A	ADD	0.1239	2.897	0.003976
6	rs9380174	30316739	A	-0.1225	0.04234	-0.2055	-0.0395	-2.893	0.00402		8	rs4282589	131654547	A	ADD	-0.1257	-2.896	0.003977
6	rs16882265	19478455	A	0.1224	0.04232	0.03947	0.2054	2.893	0.004024		18	rs165114	75385928	A	ADD	0.1244	2.896	0.003977
9	GSA-rs73650320	20177004	G	0.1217	0.04209	0.03925	0.2042	2.893	0.004025		2	rs2135269	156314691	G	ADD	-0.1235	-2.896	0.003979
7	rs4716455	156927269	A	-0.1219	0.04215	-0.2045	-0.0393	-2.892	0.004027		5	rs26768	53518099	G	ADD	0.1288	2.896	0.003979
2	rs72892780	183442160	A	0.1217	0.04208	0.03923	0.2042	2.892	0.004029		9	GSA-rs60588302	7900777	A	ADD	0.1249	2.896	0.00398
7	GSA-rs1466210	158444975	A	0.1211	0.04188	0.03903	0.2032	2.892	0.004032		10	rs79115651	20085501	G	ADD	0.1236	2.896	0.00398
11	rs12286521	573554	A	0.1223	0.04229	0.03941	0.2052	2.892	0.004034		6	rs844562	147908995	A	ADD	-0.1227	-2.896	0.003987
4	rs2342526	41222268	G	-0.124	0.04287	-0.208	-0.03993	-2.892	0.004037		5	GSA-rs2312936	73213163	A	ADD	-0.126	-2.896	0.003988
12	rs4964984	132190958	A	-0.1223	0.04228	-0.2051	-0.03939	-2.892	0.004037		19	rs2279008	17283303	G	ADD	-0.1233	-2.895	0.003997
20	IlmnSeq_rs6034225	15579575	A	0.1218	0.04212	0.03923	0.2043	2.891	0.004039		3	GSA-rs56260732	116617449	G	ADD	0.1232	2.895	0.003998
12	GSA-rs1882544	107130190	G	0.1224	0.04235	0.03944	0.2055	2.891	0.004044		7	rs2906154	2521374	A	ADD	0.1238	2.895	0.003998
3	rs12635081	65674722	C	-0.1211	0.04191	-0.2033	-0.039	-2.891	0.004049		5	IlmnSeq_rs2973319	7657882	A	ADD	-0.1264	-2.895	0.003999
2	IlmnSeq_rs1051685	217070376	G	0.1214	0.04201	0.03909	0.2038	2.89	0.004052		16	rs16970950	21145657	A	ADD	0.1233	2.894	0.004004
2	rs1051685	217070376	G	0.1214	0.04201	0.03909	0.2038	2.89	0.004052		16	rs12930293	8496035	G	ADD	0.124	2.894	0.004005
15	rs7162847	59618422	G	-0.1219	0.04217	-0.2045	-0.03924	-2.89	0.004052		18	rs8095968	77292708	A	ADD	0.1251	2.894	0.004005
20	rs6049388	24075758	G	-0.1206	0.04171	-0.2023	-0.03881	-2.89	0.004052		1	rs2587538	234875603	A	ADD	-0.1231	-2.894	0.004006
4	rs62302412	78359320	A	0.1227	0.04245	0.03949	0.2059	2.89	0.004053		6	GSA-rs13192548	92843692	G	ADD	-0.1254	-2.894	0.004012
6	rs1264616	30264307	A	-0.1224	0.04236	-0.2054	-0.0394	-2.89	0.004054		16	rs76876166	1486598	A	ADD	-0.1254	-2.893	0.004015
6	rs9380168	30275124	C	-0.1224	0.04236	-0.2054	-0.0394	-2.89	0.004054		3	rs2437219	5831036	A	ADD	-0.1261	-2.893	0.004016
1	seq-rs12744452	6308695	A	-0.1241	0.04294	-0.2083	-0.03994	-2.89	0.004057		23	rs5911926	124092815	A	ADD	-0.1322	-2.893	0.004016
1	rs12093875	66988401	A	0.1208	0.04182	0.03886	0.2028	2.889	0.004065		6	rs9496677	143896343	G	ADD	0.1288	2.893	0.004022
14	rs41435651	86648038	A	-0.1206	0.04177	-0.2025	-0.03879	-2.889	0.004074		16	rs30236	14398176	A	ADD	0.1246	2.893	0.004025
17	rs12603519	4458790	A	0.1215	0.04207	0.03907	0.204	2.889	0.004075		20	rs6061634	60119661	G	ADD	0.124	2.892	0.004027
1	rs1812115	112510134	A	-0.1239	0.04288	-0.2079	-0.0398	-2.888	0.00408		23	rs2471365	151245139	G	ADD	0.1242	2.892	0.00403
8	rs2055949	40786645	G	-0.1215	0.04206	-0.2039	-0.03904	-2.888	0.004081		3	GSA-rs358733	155485302	G	ADD	0.125	2.892	0.004034
3	rs137865706	41748394	A	0.1232	0.04266	0.03959	0.2068	2.888	0.004082		6	GSA-rs10946001	164953220	G	ADD	-0.1229	-2.892	0.004034
4	rs28419040	18779829	A	0.121	0.04191	0.03889	0.2032	2.888	0.004085		20	rs6023716	36807015	C	ADD	0.1235	2.892	0.004036
6	rs2516725	30245033	A	-0.1224	0.04239	-0.2055	-0.03934	-2.888	0.004085		3	rs6787150	6728385	G	ADD	-0.1226	-2.891	0.004039
6	rs3778624	30302600	A	0.1218	0.04218	0.03913	0.2045	2.888	0.004085		10	GSA-rs7078905	59512935	G	ADD	-0.1232	-2.891	0.004039
6	GSA-rs2342645	169033040	C	-0.1209	0.04188	-0.203	-0.03886	-2.888	0.004085		3	rs10936022	155712246	G	ADD	0.1265	2.891	0.004041
2	GSA-rs1376696	195205040	A	-0.122	0.04227	-0.2049	-0.03917	-2.887	0.004099		3	GSA-rs78730434	148354984	A	ADD	0.125	2.891	0.004043
7	rs13223379	156785712	A	0.1204	0.04171	0.03865	0.2021	2.887	0.0041		1	rs12564100	201168167	A	ADD	0.1263	2.891	0.004048
15	rs2892539	94722151	A	0.1209	0.04188	0.03881	0.203	2.887	0.0041		12	rs4766678	113397691	A	ADD	0.124	2.891	0.004048
8	GSA-rs4909520	136788138	A	-0.1214	0.04207	-0.2039	-0.03898	-2.887	0.004101		12	rs12822199	75458164	G	ADD	-0.1251	-2.891	0.004049
4	rs3775574	185370066	G	0.1219	0.04223	0.03912	0.2047	2.886	0.004103		6	rs3093561	31547474	A	ADD	0.1229	2.89	0.004054
4	GSA-rs9996706	77467600	A	-0.1213	0.04204	-0.2037	-0.03893	-2.886	0.004107		17	GSA-rs11651038	11226501	A	ADD	0.1242	2.89	0.004063
6	rs3800036	1760556	A	0.1221	0.0423	0.03917	0.205	2.886	0.00411		10	GSA-rs2209301	10151594	A	ADD	0.1229	2.889	0.004068
15	GSA-rs73472870	97535478	A	-0.1248	0.04325	-0.2096	-0.04006	-2.886	0.00411		6	rs311218	107408585	G	ADD	-0.1241	-2.889	0.004076
12	rs17124220	50369305	A	-0.1235	0.04282	-0.2075	-0.03961	-2.885	0.004123		22	rs362129	17690409	A	ADD	-0.1253	-2.888	0.004077
10	rs2704480	71612288	G	0.1212	0.04203	0.03887	0.2036	2.885	0.004124		8	rs11991058	61809348	G	ADD	0.1236	2.888	0.004081
12	rs7967868	309753	A	0.1214	0.04208	0.03891	0.2039	2.885	0.004126		12	GSA-rs1896359	115361031	G	ADD	0.1239	2.888	0.004082
2	rs17702991	187835328	A	0.1231	0.04266	0.03944	0.2067	2.884	0.004129		6	GSA-rs9347560	162324715	A	ADD	-0.1227	-2.887	0.004091
5	rs2059779	134555620	C	-0.1233	0.04275	-0.2071	-0.03952	-2.884	0.004129		14	GSA-rs62012599	44499453	G	ADD	0.124	2.887	0.004093
3	rs6781787	22161566	A	0.1247	0.04324	0.03997	0.2094	2.884	0.00413		9	rs10813951	33128021	G	ADD	0.1276	2.887	0.004095
21	rs8130631	35535498	A	0.1213	0.04204	0.03886	0.2037	2.884	0.00413		8	rs4734925	107567329	A	ADD	0.1226	2.887	0.004099
2	rs12470135	3012947	A	0.1211	0.04198	0.0388	0.2034	2.884	0.004132		8	rs4568629	25729752	A	ADD	0.1232	2.886	0.004107
14	GSA-rs12437196	21634786	A	-0.1332	0.0462	-0.2238	-0.0427	-2.884	0.004132		23	rs11796830	2811185	A	ADD	0.1246	2.886	0.004109
19	rs56911564	34242629	A	-0.1212	0.04203	-0.2036	-0.03884	-2.884	0.004133		13	rs4771176	28408480	G	ADD	0.1305	2.886	0.004112
6	rs17481190	30743014	A	-0.1232	0.0427	-0.2069	-0.03945	-2.884	0.004137		14	rs17678072	83116478	G	ADD	0.1258	2.885	0.004116
6	rs2269475	31583931	A	-0.1227	0.04255	-0.2061	-0.03929	-2.883	0.004141		11	rs589321	87621158	G	ADD	0.1248	2.885	0.004117
18	rs1017748	73528556	A	-0.122	0.04231	-0.2049	-0.03907	-2.883	0.004142		4	rs11098735	80458413	A	ADD	0.1236	2.885	0.004121
3	rs6772050	17121931	A	0.1215	0.04216	0.03891	0.2042	2.883	0.004146		6	rs509716	131433715	A	ADD	0.1236	2.885	0.004123
9	GSA-rs10968632	28517170	G	0.1212	0.04204	0.03878	0.2036	2.882	0.004154		7	rs12056030	51500101	C	ADD	-0.1236	-2.885	0.004124
11	rs651821	116662579	G	0.1223	0.04241	0.03912	0.2054	2.882	0.004154		11	rs4150563	18355102	C	ADD	0.1234	2.885	0.004125
12	rs12371759	72779908	A	0.1203	0.04173	0.03849	0.2021	2.882	0.004155		20	rs6096214	49588788	A	ADD	-0.1231	-2.884	0.004129
17	rs7215135	9164548	A	-0.1225	0.0425	-0.2058	-0.03919	-2.882	0.004157		15	rs6495529	81179553	A	ADD	0.1246	2.884	0.004136
2	rs1863688	108556791	A	0.1245	0.0432	0.03984	0.2092	2.882	0.004158		8	rs6530747	14139307	C	ADD	-0.1239	-2.884	0.004143
15	rs62015235	52398184	G	0.1264	0.04388	0.04045	0.2124	2.882	0.004165		2	rs16858108	12124522	A	ADD	-0.1235	-2.883	0.00415
3	rs1025690	53882663	G	0.1205	0.04182	0.03851	0.2025	2.881	0.004175		18	rs656134	40472219	A	ADD	0.1245	2.883	0.004152
6	GSA-rs12528388	116233183	A	0.1227	0.04259	0.03922	0.2062	2.881	0.004176		4	rs12513059	146285738	A	ADD	-0.1271	-2.882	0.004154
6	GSA-rs76110418	116234004	A	0.1227	0.04259	0.03922	0.2062	2.881	0.004176		14	rs10872871	33386759	G	ADD	0.1263	2.882	0.004154
12	rs2433644	22987463	A	0.1209	0.04196	0.03863	0.2031	2.881	0.004178		22	rs5761487	26738225	G	ADD	-0.1232	-2.882	0.004157
1	rs1539483	80684660	A	0.1249	0.04335	0.03989	0.2098	2.88	0.004181		2	GSA-rs7607970	148505928	A	ADD	0.1234	2.882	0.004162
15	GSA-rs12185071	58683227	A	-0.1202	0.04177	-0.2021	-0.03837	-2.879	0.004203		1	rs1512581	216455107	A	ADD	-0.1233	-2.882	0.004163
2	GSA-rs1918700	183449725	C	0.1243	0.04319	0.03969	0.209	2.879	0.004204		8	rs7824633	51983919	A	ADD	0.123	2.882	0.004163
7	rs4727499	101238449	A	0.1206	0.04189	0.03847	0.2027	2.878	0.004207		14	rs1951033	101135318	A	ADD	-0.1266	-2.882	0.004163
17	rs7215724	36195934	G	-0.1269	0.04411	-0.2134	-0.0405	-2.878	0.00421		13	rs9549564	113479813	A	ADD	0.123	2.882	0.004164
7	GSA-rs2969124	156711661	A	0.1216	0.04228	0.03877	0.2045	2.877	0.004224		7	rs877156	151101540	A	ADD	0.1229	2.882	0.004166
17	rs8066556	63444042	G	0.1222	0.04246	0.03894	0.2054	2.877	0.004224		2	rs9789764	183373914	G	ADD	0.1262	2.881	0.004169
10	GSA-rs7081488	36409044	G	0.1214	0.04219	0.0387	0.2041	2.877	0.004225		4	rs1436576	96600219	A	ADD	-0.1235	-2.881	0.004169
1	rs6695728	114720926	A	-0.1204	0.04184	-0.2024	-0.03836	-2.877	0.004227		8	rs79851411	13716390	A	ADD	-0.124	-2.88	0.004182
2	GSA-rs11125609	56115834	G	-0.1208	0.04199	-0.2031	-0.03848	-2.876	0.004231		5	rs13185308	10594061	G	ADD	0.126	2.88	0.004186
3	rs3773260	13664936	G	0.1217	0.04232	0.03879	0.2047	2.876	0.004231		18	GSA-rs306220	60298738	G	ADD	0.124	2.88	0.004187
1	GSA-rs77238475	164083427	A	0.1217	0.04231	0.03877	0.2046	2.876	0.004233		14	rs9972232	22737591	G	ADD	0.1227	2.88	0.004188
4	rs335324	62349873	G	0.1224	0.04257	0.03901	0.2059	2.876	0.004236		4	rs28711020	4875864	G	ADD	-0.1225	-2.879	0.004192
20	rs74173201	43058012	C	-0.1202	0.0418	-0.2022	-0.03829	-2.876	0.004238		5	rs10071654	168563018	A	ADD	0.123	2.879	0.004192
7	rs73035683	3160318	G	0.1215	0.04225	0.03867	0.2043	2.875	0.004248		18	rs1865288	39257639	A	ADD	0.1244	2.879	0.004194
7	rs740539	156398403	G	0.1212	0.04216	0.03859	0.2039	2.875	0.004248		5	GSA-rs11948199	120054322	C	ADD	0.1278	2.879	0.004201
12	rs2909075	22263219	G	-0.124	0.04312	-0.2085	-0.03945	-2.875	0.004255		1	rs503633	231389097	A	ADD	0.1234	2.879	0.004203
14	rs740037	71660853	A	0.124	0.04312	0.03944	0.2085	2.874	0.004258		7	GSA-rs369982	94048482	G	ADD	0.1221	2.879	0.004204
11	rs9787808	33430056	G	-0.1206	0.04196	-0.2028	-0.03834	-2.874	0.004267		17	GSA-rs9897452	27781594	G	ADD	-0.1235	-2.879	0.004204
15	GSA-rs12903395	23082237	G	0.1213	0.04223	0.03853	0.2041	2.872	0.004287		12	rs10783615	54349773	G	ADD	0.1228	2.878	0.004211
7	rs1420195	36211147	G	0.122	0.04248	0.03875	0.2053	2.872	0.004288		21	rs9981974	16759963	G	ADD	-0.1229	-2.878	0.004211
11	IlmnSeq_rs651821	116662579	G	0.1216	0.04233	0.03861	0.2045	2.872	0.004289		8	GSA-rs2943611	76473939	A	ADD	0.1228	2.878	0.004213
11	IlmnSeq_rs662799	116663707	G	0.1216	0.04233	0.03861	0.2045	2.872	0.004289		7	rs4721664	17912336	G	ADD	0.1238	2.877	0.00422
11	rs662799	116663707	G	0.1216	0.04233	0.03861	0.2045	2.872	0.004289		10	rs2298126	16558985	C	ADD	-0.1243	-2.877	0.004224
6	rs6920629	107380837	G	0.1203	0.04187	0.03818	0.2023	2.872	0.004292		5	rs111958946	33627444	A	ADD	-0.1225	-2.877	0.004225
6	rs316144	52879695	G	-0.1217	0.04239	-0.2048	-0.03866	-2.872	0.004293		1	GSA-rs72690316	48071281	A	ADD	0.1224	2.877	0.004227
5	rs4958493	151110223	A	-0.1205	0.04197	-0.2028	-0.03826	-2.872	0.004295		10	IlmnSeq_rs10763654	28540638	A	ADD	0.1225	2.877	0.004227
2	rs13383897	197314620	G	0.1206	0.04201	0.0383	0.203	2.872	0.004296		10	rs34552277	37505159	A	ADD	0.1236	2.877	0.004229
14	IlmnSeq_rs7157021	23598952	A	-0.1253	0.04364	-0.2109	-0.03979	-2.872	0.004296		7	rs62468568	78145962	A	ADD	0.1228	2.876	0.004233
6	rs9276976	32973794	A	0.1212	0.0422	0.03846	0.2039	2.872	0.004297		2	rs579861	239348995	C	ADD	0.1217	2.876	0.004234
11	rs12574829	131300848	A	-0.1238	0.04311	-0.2083	-0.0393	-2.872	0.004297		4	rs10517457	37954839	G	ADD	0.123	2.876	0.00424
6	rs3094116	30738408	T	0.1202	0.04188	0.03815	0.2023	2.871	0.004305		20	GSA-rs913786	14950049	G	ADD	0.123	2.876	0.00424
12	rs7316596	129075053	G	0.1216	0.04236	0.03858	0.2046	2.871	0.004308		2	rs10194900	72325404	C	ADD	0.1228	2.876	0.004241
2	rs515135	21286057	A	-0.1211	0.04217	-0.2037	-0.0384	-2.871	0.004309		1	rs11582767	181126503	A	ADD	0.1227	2.876	0.004242
11	rs919476	20888625	A	-0.1201	0.04185	-0.2022	-0.0381	-2.87	0.004311		5	rs199990	8641457	A	ADD	-0.1229	-2.876	0.004242
2	GSA-rs6749889	123503566	G	-0.1204	0.04195	-0.2026	-0.03818	-2.87	0.004318		6	GSA-rs7763790	24615063	A	ADD	-0.123	-2.875	0.004244
12	rs10861496	106148808	G	-0.1199	0.04179	-0.2018	-0.03803	-2.87	0.004318		12	exm2267456	84346746	A	ADD	-0.1232	-2.876	0.004245
3	rs2124513	150626666	A	0.1211	0.04221	0.03841	0.2039	2.87	0.004319		13	GSA-rs1336924	54282926	G	ADD	-0.1261	-2.875	0.004247
10	GSA-rs11194001	110054352	A	0.1212	0.04223	0.03842	0.204	2.87	0.004321		18	GSA-rs9807273	28078707	G	ADD	-0.1257	-2.875	0.004249
11	rs73493606	76751166	A	-0.1199	0.04178	-0.2018	-0.038	-2.87	0.004323		6	rs4870294	154787639	G	ADD	-0.1263	-2.875	0.00425
22	rs9610498	36777739	A	0.1209	0.04213	0.03832	0.2035	2.87	0.004323		17	rs62091994	2870382	A	ADD	0.1238	2.875	0.004251
4	GSA-rs72685643	164781287	G	-0.1198	0.04175	-0.2016	-0.03796	-2.869	0.004331		3	rs7628878	170671429	A	ADD	0.1227	2.875	0.004254
12	rs6582413	43068050	A	0.1199	0.04178	0.03798	0.2018	2.869	0.004331		4	rs34545154	101246120	G	ADD	0.1224	2.874	0.004259
2	rs59804339	183434480	C	0.1205	0.04202	0.03816	0.2029	2.868	0.004344		11	GSA-rs682572	31922680	G	ADD	0.122	2.874	0.00426
2	GSA-rs17651864	70867582	A	-0.1204	0.04199	-0.2027	-0.03813	-2.868	0.004345		14	IlmnSeq_rs12433475	35063316	A	ADD	0.1258	2.874	0.004261
6	rs4711274	31583166	A	-0.123	0.0429	-0.2071	-0.03893	-2.868	0.004355		10	rs11592057	101152191	G	ADD	0.1252	2.874	0.004266
1	1:207679307-AC	207679307	A	-0.1226	0.04277	-0.2064	-0.03877	-2.867	0.004363		7	rs12537002	26570142	A	ADD	0.1223	2.873	0.004274
1	GSA-rs114983999	4751901	A	0.1199	0.04181	0.03791	0.2018	2.867	0.004364		21	rs914165	42415929	G	ADD	-0.1226	-2.873	0.004274
23	rs5979317	10502458	A	-0.1223	0.04267	-0.206	-0.03868	-2.866	0.004367		16	rs391901	1910046	C	ADD	0.1219	2.873	0.004276
6	rs851034	35987645	A	-0.1225	0.04273	-0.2062	-0.03871	-2.866	0.004375		6	exm2262180	83610839	G	ADD	-0.1245	-2.873	0.004277
10	rs1874074	31037688	A	-0.1215	0.04242	-0.2047	-0.03841	-2.865	0.004379		13	rs667631	102823429	G	ADD	0.1231	2.873	0.004279
8	rs71522352	13414362	G	0.1227	0.04282	0.03876	0.2066	2.865	0.004384		13	rs9568354	50487993	A	ADD	0.122	2.873	0.004281
15	rs10438339	32400218	G	-0.1196	0.04173	-0.2014	-0.03777	-2.865	0.004384		6	rs9459017	164596778	A	ADD	0.123	2.872	0.004297
1	rs10864665	231204794	A	-0.1201	0.04191	-0.2022	-0.03793	-2.865	0.004386		4	rs11735694	101026248	A	ADD	0.1223	2.871	0.004302
6	rs809419	24526990	A	0.1225	0.04276	0.0387	0.2063	2.865	0.004388		7	GSA-rs314299	100371473	A	ADD	-0.1252	-2.87	0.004314
8	IlmnSeq_rs435904	31789101	A	0.121	0.04223	0.03821	0.2037	2.865	0.004388		15	IlmnSeq_rs8023503	58740588	A	ADD	-0.1352	-2.87	0.004314
8	rs435904	31789101	A	0.121	0.04223	0.03821	0.2037	2.865	0.004388		15	GSA-rs8023503	58740588	A	ADD	-0.1352	-2.87	0.004314
4	GSA-rs10517805	165228232	G	-0.12	0.04189	-0.2021	-0.03788	-2.864	0.004393		1	rs9804028	246017897	A	ADD	0.1243	2.87	0.004315
12	rs12582821	107691022	C	0.121	0.04225	0.0382	0.2038	2.864	0.004394		4	GSA-rs7686798	161141895	A	ADD	0.1225	2.87	0.004315
13	rs1924590	97421345	G	0.1216	0.04246	0.03839	0.2048	2.864	0.004399		10	rs7909832	16556710	A	ADD	-0.1223	-2.87	0.00432
1	GSA-rs2645290	119471908	A	0.1205	0.04206	0.03801	0.2029	2.864	0.004404		2	rs4853759	1745326	A	ADD	0.1219	2.87	0.004321
4	GSA-rs78532465	19448408	A	-0.12	0.04191	-0.2021	-0.03785	-2.863	0.004411		14	rs76233123	26134049	G	ADD	0.1217	2.87	0.004322
12	GSA-rs366921	41999773	A	-0.1198	0.04185	-0.2018	-0.03779	-2.863	0.004411		16	GSA-rs9929255	24483464	G	ADD	-0.123	-2.87	0.004326
2	rs17817076	191851997	G	0.1245	0.04349	0.03927	0.2097	2.863	0.004413		7	IlmnSeq_rs31652	87029687	G	ADD	-0.1226	-2.869	0.004328
4	GSA-rs363097	3177259	G	-0.1202	0.042	-0.2026	-0.03791	-2.863	0.004417		12	rs12814812	26862439	G	ADD	0.1249	2.869	0.004334
13	rs5006923	105672487	C	-0.1216	0.04248	-0.2048	-0.03834	-2.863	0.004419		7	rs1404677	63729479	A	ADD	-0.1221	-2.869	0.004337
12	GSA-rs2701095	69108909	G	0.1194	0.04172	0.03763	0.2012	2.862	0.004427		2	rs4374383	112770770	A	ADD	0.1224	2.868	0.004338
2	GSA-rs10200749	187310584	A	0.1254	0.04382	0.03952	0.2113	2.862	0.00443		1	rs12124860	9627103	A	ADD	0.1224	2.868	0.004339
2	rs3755160	169817403	G	0.1209	0.04226	0.03807	0.2037	2.861	0.004442		7	GSA-rs13240924	134536301	A	ADD	-0.1217	-2.868	0.004339
23	rs3788766	115566839	G	0.1254	0.04382	0.03947	0.2112	2.861	0.004443		2	GSA-rs3770704	208439118	G	ADD	-0.1232	-2.868	0.004342
23	rs5925758	23383398	A	-0.1234	0.04315	-0.208	-0.03885	-2.86	0.004448		18	rs1132845	72912469	A	ADD	0.1228	2.868	0.004342
9	GSA-rs4612444	83089867	A	-0.1229	0.04298	-0.2072	-0.03869	-2.86	0.004449		4	rs1540663	188981386	A	ADD	-0.1249	-2.868	0.00435
11	GSA-rs1517573	28786347	A	-0.1202	0.04203	-0.2026	-0.03783	-2.86	0.00445		1	rs562445	166730812	A	ADD	-0.1224	-2.867	0.004351
9	GSA-rs72743709	109742967	A	0.1198	0.0419	0.03771	0.2019	2.86	0.004453		3	rs28575541	61905527	A	ADD	0.1223	2.867	0.004357
2	GSA-rs17629007	200721555	G	-0.1212	0.04237	-0.2042	-0.03812	-2.86	0.004457		4	INMG_11874	183692580	G	ADD	0.1227	2.867	0.004359
2	GSA-rs117706136	198691903	A	-0.1205	0.04213	-0.2031	-0.0379	-2.859	0.00446		1	rs7531307	179302003	A	ADD	0.1218	2.867	0.00436
8	GSA-rs4457349	126494317	G	-0.1199	0.04194	-0.2021	-0.03771	-2.859	0.004464		2	rs1234375	148767821	A	ADD	-0.1216	-2.867	0.004362
6	rs17189441	30758555	A	-0.1223	0.04277	-0.2061	-0.03846	-2.859	0.004465		9	GSA-rs7034041	38443758	A	ADD	0.1241	2.867	0.004363
3	GSA-rs79185493	57055923	G	-0.1201	0.042	-0.2024	-0.03775	-2.859	0.004467		3	rs67976654	133702144	G	ADD	0.1224	2.866	0.00437
11	rs2283205	2741327	A	-0.1211	0.04238	-0.2042	-0.03809	-2.859	0.004471		22	rs11089669	34803550	A	ADD	0.1231	2.866	0.00437
19	rs1671163	55590671	A	0.1196	0.04184	0.0376	0.2016	2.859	0.004471		6	rs1359931	97377572	A	ADD	-0.1252	-2.866	0.004371
2	rs11897873	130681447	G	-0.1209	0.04229	-0.2038	-0.03799	-2.858	0.004475		2	rs1992950	200290359	G	ADD	-0.1218	-2.866	0.004372
2	rs73944940	105297820	G	-0.1206	0.0422	-0.2033	-0.03791	-2.858	0.004476		6	rs7753256	54509300	A	ADD	-0.1244	-2.866	0.004373
18	rs1582761	2228201	A	0.1219	0.04267	0.03832	0.2056	2.858	0.004482		19	rs62111203	13508485	G	ADD	-0.1255	-2.866	0.004373
12	GSA-rs35760	102950218	A	-0.1202	0.04206	-0.2026	-0.03776	-2.858	0.004484		23	rs4532713	45104532	C	ADD	0.1243	2.866	0.004375
5	rs12655276	10855452	G	-0.1195	0.04182	-0.2015	-0.03753	-2.857	0.00449		23	rs112720761	152767020	A	ADD	0.1256	2.866	0.004375
5	rs12332110	116828752	A	0.1223	0.0428	0.03841	0.2062	2.857	0.004492		12	rs1985825	110054356	G	ADD	-0.1233	-2.865	0.004383
1	rs12022666	91097495	A	0.1218	0.04264	0.03826	0.2054	2.857	0.004493		1	rs17390593	80876340	A	ADD	0.122	2.865	0.004384
7	rs7785123	42344694	A	0.1199	0.04198	0.0376	0.2022	2.856	0.004512		15	rs2924634	69089815	A	ADD	-0.1229	-2.865	0.004386
4	rs62350025	165051986	A	-0.1198	0.04196	-0.202	-0.03758	-2.856	0.004513		1	rs1753579	234837359	G	ADD	-0.1226	-2.864	0.004392
15	rs4351998	66924801	A	-0.1204	0.04217	-0.2031	-0.03777	-2.856	0.004514		1	rs1567310	48028705	A	ADD	0.1218	2.864	0.004394
9	GSA-rs10811312	20083046	A	-0.1199	0.04198	-0.2022	-0.0376	-2.856	0.004515		13	rs9547461	36937681	A	ADD	0.1219	2.864	0.004394
1	rs1805050	216496947	A	-0.1206	0.04224	-0.2034	-0.03782	-2.855	0.004517		16	rs935810	6196485	G	ADD	-0.1216	-2.864	0.004399
2	rs62203051	196324595	A	-0.1219	0.04271	-0.2057	-0.03824	-2.855	0.004517		10	rs11188281	82835524	C	ADD	-0.1225	-2.864	0.004401
11	rs10791393	134664007	G	-0.1227	0.04296	-0.2069	-0.03847	-2.855	0.004518		7	GSA-rs12674093	33554162	C	ADD	-0.1225	-2.863	0.004408
23	INMG_06132	113890903	A	0.1258	0.04407	0.03947	0.2122	2.856	0.004519		15	rs7172033	60241509	G	ADD	0.1281	2.863	0.00441
11	rs2000852	133838221	A	-0.1203	0.04213	-0.2028	-0.0377	-2.855	0.004525		16	rs12324955	54019686	A	ADD	-0.122	-2.863	0.00441
3	rs3821473	59625877	A	0.1214	0.04254	0.03806	0.2048	2.855	0.004527		3	GSA-rs1286762	25598909	A	ADD	0.1242	2.863	0.004412
17	rs9902778	32297419	G	-0.1192	0.04175	-0.201	-0.03734	-2.854	0.004531		14	rs28694719	52350938	G	ADD	0.1232	2.863	0.004412
3	rs3856695	78873936	A	-0.1203	0.04216	-0.2029	-0.03769	-2.854	0.004538		2	rs6434320	189942512	A	ADD	-0.1235	-2.863	0.004416
11	rs10897563	79907395	A	0.1191	0.04173	0.0373	0.2009	2.854	0.004539		14	rs12896090	28467400	C	ADD	0.1216	2.862	0.004419
13	rs56376419	40895867	G	0.1219	0.04272	0.03817	0.2056	2.854	0.004542		15	GSA-rs6493576	53016510	G	ADD	-0.1234	-2.862	0.004419
5	GSA-rs11749685	13630037	A	-0.1207	0.04229	-0.2036	-0.03779	-2.854	0.004543		5	rs1703368	53399217	A	ADD	-0.1231	-2.862	0.00442
5	rs1860991	141613468	A	0.1233	0.04322	0.03862	0.208	2.853	0.004544		12	rs4761735	94044690	A	ADD	0.1234	2.862	0.004423
8	rs7842632	16640023	A	-0.1201	0.0421	-0.2026	-0.03761	-2.853	0.004547		14	GSA-rs7152665	33950855	A	ADD	0.1229	2.862	0.004424
4	rs2288675	165118652	A	0.1195	0.04188	0.0374	0.2016	2.853	0.00455		15	rs8031715	58742196	G	ADD	-0.1337	-2.862	0.004425
22	rs10460765	47944748	G	-0.1213	0.04252	-0.2047	-0.03798	-2.853	0.004551		19	rs892140	5352551	G	ADD	-0.1233	-2.862	0.004427
21	rs8129326	35812627	A	-0.1195	0.04188	-0.2015	-0.03739	-2.853	0.004552		5	GSA-rs16871023	73215237	A	ADD	-0.1225	-2.862	0.004428
2	rs6541859	123524253	G	-0.1201	0.0421	-0.2026	-0.03759	-2.853	0.004553		15	rs12708600	93585622	A	ADD	0.1293	2.862	0.004428
6	rs1264537	30390199	A	0.1215	0.04257	0.03802	0.2049	2.853	0.004553		19	rs74770749	14742586	A	ADD	-0.1235	-2.862	0.004428
18	rs10439033	64892947	G	0.1219	0.04274	0.03816	0.2057	2.853	0.004553		8	rs10108900	62134118	C	ADD	-0.1245	-2.861	0.004436
11	rs10833509	21355150	A	-0.1199	0.04202	-0.2022	-0.03751	-2.853	0.004555		8	rs13279665	1677822	C	ADD	-0.1232	-2.861	0.004438
2	rs6732961	196311421	A	-0.1215	0.04261	-0.205	-0.03803	-2.853	0.004556		11	rs4121680	97915326	A	ADD	0.129	2.861	0.004439
1	rs668630	20396674	A	-0.1193	0.04181	-0.2012	-0.03732	-2.853	0.004557		4	rs62311724	133524015	G	ADD	-0.1232	-2.861	0.004443
1	GSA-rs16822674	163896553	A	0.1245	0.04366	0.03895	0.2101	2.852	0.004565		18	exm2268141	28683238	A	ADD	0.1224	2.86	0.004447
9	GSA-rs990029	121992686	G	0.1204	0.04223	0.03765	0.2032	2.852	0.004571		1	GSA-rs2275450	238070459	A	ADD	-0.1246	-2.86	0.004452
13	rs585719	47056399	A	0.1206	0.0423	0.03771	0.2035	2.851	0.004575		15	rs114721012	81502058	A	ADD	0.1215	2.86	0.004452
18	rs55748182	13428754	A	-0.1194	0.04188	-0.2015	-0.03731	-2.851	0.004579		2	rs79232266	50854610	A	ADD	0.1228	2.86	0.004456
23	rs3904331	68420848	G	-0.1207	0.04233	-0.2037	-0.03772	-2.851	0.004579		5	rs10044368	151193637	A	ADD	0.1225	2.86	0.004457
1	rs9662598	19191326	A	0.1218	0.04274	0.03807	0.2056	2.851	0.004581		2	IlmnSeq_rs10186393	133638721	A	ADD	-0.1237	-2.86	0.004459
11	GSA-rs174600	61622227	A	-0.1302	0.04568	-0.2198	-0.0407	-2.851	0.004581		1	rs350182	4548292	A	ADD	0.1223	2.859	0.004461
4	rs6534029	118185220	A	0.1203	0.04219	0.03757	0.2029	2.851	0.004584		3	rs4282030	57200580	C	ADD	0.1239	2.859	0.004461
6	rs2647089	32681568	G	0.1194	0.0419	0.03732	0.2016	2.851	0.004584		13	GSA-rs73227678	76858135	A	ADD	0.1234	2.859	0.004462
6	rs6935723	32681669	G	0.1194	0.0419	0.03732	0.2016	2.851	0.004584		14	rs2249106	62065848	G	ADD	-0.1215	-2.859	0.004466
6	GSA-rs74730951	147513709	A	-0.1213	0.04254	-0.2047	-0.03789	-2.851	0.004584		3	rs28821834	99380627	C	ADD	-0.1213	-2.859	0.004473
6	rs339331	117210052	G	-0.1193	0.04188	-0.2014	-0.03726	-2.85	0.004595		8	rs12675477	72375328	A	ADD	-0.1224	-2.858	0.004474
21	rs17836106	19496429	G	0.1197	0.042	0.03737	0.202	2.85	0.004597		5	GSA-rs79009010	2669244	A	ADD	0.1233	2.858	0.004475
11	IlmnSeq_rs4225	116703671	A	-0.1209	0.04244	-0.2041	-0.03775	-2.85	0.0046		2	GSA-rs76141532	121585736	A	ADD	0.1239	2.858	0.004487
7	GSA-rs78918375	156394307	A	-0.1195	0.04193	-0.2016	-0.03729	-2.849	0.004601		18	GSA-rs77631284	29877821	G	ADD	0.1225	2.858	0.004487
12	GSA-rs74442791	51650625	G	-0.1231	0.0432	-0.2077	-0.03841	-2.849	0.004604		5	exm2266142	175176876	G	ADD	-0.1231	-2.856	0.004503
6	rs6905258	21012904	A	-0.1198	0.04207	-0.2023	-0.0374	-2.849	0.004606		23	rs2407935	12409249	A	ADD	0.1239	2.856	0.004503
13	rs462954	92371090	G	0.119	0.04176	0.03713	0.2008	2.849	0.004606		3	rs9825129	28043715	A	ADD	-0.1272	-2.856	0.004506
6	rs6940789	1167794	G	-0.1213	0.04257	-0.2047	-0.03785	-2.849	0.004607		4	rs4693608	84241357	G	ADD	-0.1226	-2.856	0.004507
1	rs16858419	181962563	C	0.1215	0.04264	0.03788	0.205	2.848	0.004617		23	JHU_X.151807833	151807834	G	ADD	0.1234	2.856	0.004508
1	rs2883720	231255113	G	0.1193	0.04189	0.03721	0.2014	2.848	0.004618		7	rs77514067	3045788	A	ADD	-0.122	-2.856	0.004513
2	IlmnSeq_rs17863783	234602277	A	-0.1194	0.04193	-0.2016	-0.03723	-2.848	0.00462		10	rs1319836	56088627	A	ADD	-0.1235	-2.856	0.004514
2	rs17863783	234602277	A	-0.1194	0.04193	-0.2016	-0.03723	-2.848	0.00462		2	rs17177643	196375520	G	ADD	0.1258	2.855	0.004519
1	rs642961	209989270	A	0.1199	0.04209	0.03737	0.2023	2.848	0.004624		12	rs6580864	52589274	A	ADD	0.1229	2.855	0.004528
18	rs4358042	67325043	G	-0.1224	0.04298	-0.2066	-0.03815	-2.848	0.004626		23	rs5954787	141729498	G	ADD	0.1272	2.855	0.004528
3	rs9990047	41448372	A	-0.1201	0.04217	-0.2027	-0.03742	-2.847	0.004629		4	rs6536595	162382240	A	ADD	0.1214	2.855	0.004529
10	rs915267	1976876	G	-0.119	0.04181	-0.201	-0.03708	-2.847	0.004638		2	rs2551188	38302794	A	ADD	-0.1209	-2.854	0.00453
7	rs10258054	143624576	C	0.1205	0.04233	0.03754	0.2035	2.847	0.004642		7	rs7791326	81087389	G	ADD	0.1226	2.855	0.00453
16	rs12929721	83472854	A	0.1214	0.04264	0.03779	0.2049	2.846	0.004644		8	rs7004630	120705817	A	ADD	-0.1236	-2.854	0.004531
11	rs11212745	97663464	A	0.1203	0.04226	0.03746	0.2031	2.846	0.004645		8	rs2582635	53376653	G	ADD	-0.123	-2.854	0.004537
12	rs10516	51745834	A	0.122	0.04285	0.03797	0.2059	2.846	0.004649		10	rs57621454	48529682	G	ADD	0.1213	2.853	0.004544
3	rs798401	118456547	A	-0.1205	0.04234	-0.2035	-0.03747	-2.845	0.004664		3	rs11128801	16680667	G	ADD	0.1214	2.853	0.004545
20	GSA-rs1884604	16283898	G	-0.1195	0.04201	-0.2019	-0.03718	-2.845	0.004664		6	rs9398995	132140203	G	ADD	0.1233	2.853	0.004545
3	IlmnSeq_rs78690920	68305462	A	-0.1213	0.04263	-0.2048	-0.03772	-2.845	0.004665		23	rs3109527	34986964	G	ADD	-0.1245	-2.853	0.004547
17	rs80283782	17545304	A	0.1209	0.04251	0.03762	0.2043	2.845	0.004665		1	rs34124670	71331812	A	ADD	0.1222	2.853	0.004549
5	rs1393120	4738222	A	0.1206	0.0424	0.03751	0.2037	2.845	0.004666		5	rs10064609	77278872	A	ADD	-0.1219	-2.853	0.004549
22	rs8135880	44834292	A	0.1193	0.04193	0.03709	0.2014	2.845	0.00467		7	GSA-rs35572444	54650221	A	ADD	0.1213	2.853	0.00455
8	rs1010313	60002542	A	-0.1189	0.04179	-0.2008	-0.03696	-2.844	0.004673		21	rs9974061	47032094	A	ADD	0.1239	2.852	0.004561
10	rs7068620	10912974	A	-0.1233	0.04334	-0.2082	-0.03833	-2.844	0.004674		1	rs6663897	59940664	A	ADD	-0.123	-2.852	0.004563
10	rs7908509	67617331	G	0.1188	0.04177	0.03692	0.2006	2.844	0.004679		22	rs5752472	27438543	A	ADD	-0.1229	-2.852	0.00457
1	rs17096897	59379043	G	0.1204	0.04233	0.03742	0.2033	2.844	0.00468		13	rs9538215	59376406	G	ADD	-0.1239	-2.852	0.004574
7	rs2087912	53075827	C	0.12	0.04221	0.0373	0.2028	2.844	0.004682		17	rs7219131	78252770	A	ADD	0.1214	2.851	0.004576
6	rs10498704	22018994	G	0.1235	0.04344	0.03838	0.2086	2.844	0.004684		4	GSA-rs1565840	164634372	C	ADD	0.1219	2.851	0.004579
17	rs12603843	45307359	G	-0.1198	0.04213	-0.2024	-0.03723	-2.844	0.004684		17	GSA-rs2716192	67532016	A	ADD	0.1287	2.851	0.00458
6	rs296424	133725974	A	0.1229	0.04324	0.0382	0.2077	2.843	0.004688		17	rs7210047	27728496	A	ADD	-0.1217	-2.85	0.004588
14	rs28393479	25263850	A	0.1199	0.04218	0.03726	0.2026	2.843	0.004688		17	GSA-rs7208675	27737148	G	ADD	-0.1217	-2.85	0.004588
2	rs145650663	131158755	A	-0.1206	0.04241	-0.2037	-0.03744	-2.843	0.004698		17	GSA-rs4794856	27742392	A	ADD	-0.1217	-2.85	0.004588
3	IlmnSeq_rs2623882	12049218	A	-0.1208	0.0425	-0.2041	-0.0375	-2.842	0.004702		17	GSA-rs9916533	27771128	G	ADD	-0.1217	-2.85	0.004588
6	rs1511478	23976276	A	-0.1216	0.04278	-0.2054	-0.03774	-2.842	0.004706		17	GSA-rs734729	59392956	G	ADD	0.1236	2.85	0.004588
14	rs2888002	80853336	C	-0.1259	0.04432	-0.2128	-0.03908	-2.842	0.004711		20	IlmnSeq_rs17001256	54090626	C	ADD	0.1254	2.85	0.004589
8	rs6601694	8248058	A	-0.1201	0.04228	-0.203	-0.03727	-2.842	0.004713		12	IlmnSeq_rs10847827	129791367	A	ADD	-0.121	-2.85	0.00459
15	rs8029222	58812322	C	0.1197	0.04212	0.03713	0.2022	2.842	0.004716		12	rs10773753	130702123	C	ADD	0.121	2.85	0.00459
7	rs6961856	157866856	A	0.1217	0.04284	0.03775	0.2057	2.841	0.004717		10	rs2397753	132987665	A	ADD	-0.1236	-2.85	0.004592
7	rs7808249	86983715	A	-0.1194	0.04201	-0.2017	-0.03702	-2.841	0.004719		8	rs7005444	6175643	A	ADD	0.1233	2.849	0.004604
2	GSA-rs12990943	193333428	A	0.1188	0.04183	0.03683	0.2008	2.84	0.004732		23	rs12558491	29906153	A	ADD	0.1279	2.849	0.004604
20	rs16823	17791064	A	-0.1191	0.04194	-0.2013	-0.03692	-2.84	0.004732		20	rs2294259	8247326	C	ADD	0.1252	2.849	0.004606
4	rs2310033	29441731	G	0.1193	0.04202	0.03698	0.2017	2.84	0.004737		16	rs211504	26799280	G	ADD	-0.1242	-2.849	0.004608
17	rs2272571	18047189	A	0.1211	0.04264	0.0375	0.2046	2.839	0.004746		4	rs16881492	29203881	G	ADD	0.1237	2.849	0.004614
17	rs28583833	146883	G	0.1204	0.0424	0.03728	0.2035	2.839	0.004748		7	rs67091546	150567184	G	ADD	0.1221	2.848	0.004616
13	rs2481873	62907090	A	-0.1202	0.04233	-0.2032	-0.03723	-2.839	0.004749		11	rs10792872	86387209	A	ADD	-0.1211	-2.848	0.004617
7	rs6966989	7347708	C	0.1202	0.04236	0.03722	0.2033	2.839	0.004756		4	rs11931074	90639515	A	ADD	-0.122	-2.848	0.004621
10	rs4980260	124872585	A	-0.1202	0.04236	-0.2032	-0.03722	-2.839	0.004756		20	rs912180	37710799	A	ADD	-0.1211	-2.848	0.004621
16	rs8050080	86135411	A	-0.12	0.04226	-0.2028	-0.03713	-2.839	0.004757		1	rs12023706	33512628	A	ADD	-0.1222	-2.848	0.004626
3	rs962847	40495156	A	0.1187	0.04182	0.03673	0.2006	2.838	0.00476		3	rs55764448	14396529	A	ADD	-0.1217	-2.847	0.004628
1	rs1512581	216455107	A	-0.1197	0.04216	-0.2023	-0.03703	-2.838	0.004761		17	IlmnSeq_rs2072330	19644472	T	ADD	0.1217	2.848	0.004628
3	GSA-rs7647656	144456570	A	0.1188	0.04184	0.03674	0.2008	2.838	0.004765		9	exm2266917	84011200	G	ADD	0.1227	2.847	0.004638
4	rs10009235	162227774	A	0.1212	0.0427	0.03749	0.2049	2.838	0.004767		23	rs5916677	4576808	G	ADD	0.1268	2.847	0.004638
9	GSA-rs10812407	2659195	A	-0.1222	0.04305	-0.2066	-0.0378	-2.838	0.004767		1	GSA-rs773554	113830085	A	ADD	-0.1224	-2.846	0.004647
6	rs72828920	24101494	G	0.1215	0.04282	0.03758	0.2055	2.838	0.004771		18	GSA-rs73943411	1090384	C	ADD	-0.1229	-2.846	0.004648
5	rs331743	124866783	A	0.1189	0.04191	0.03678	0.2011	2.838	0.004773		7	rs42032	92237426	A	ADD	-0.1257	-2.845	0.004659
7	rs4717004	155965622	A	0.123	0.04333	0.03802	0.2079	2.837	0.004774		9	GSA-rs7865502	21684722	A	ADD	-0.1222	-2.845	0.004659
1	rs2501540	181243896	G	-0.1214	0.0428	-0.2053	-0.03755	-2.837	0.004775		7	rs111669768	5196436	G	ADD	-0.1255	-2.845	0.004663
2	rs9917191	1719083	C	0.1206	0.04252	0.03729	0.204	2.837	0.00478		1	rs1033491	210580381	A	ADD	0.122	2.845	0.004666
19	rs8111653	38688457	A	0.1197	0.04219	0.03701	0.2024	2.837	0.00478		14	rs4466998	65475540	C	ADD	-0.1223	-2.843	0.004687
1	rs12566219	4180839	A	0.1196	0.04215	0.03696	0.2022	2.837	0.004781		4	rs11725714	80225920	A	ADD	0.1211	2.843	0.004693
4	rs4863172	189210873	A	-0.1186	0.0418	-0.2005	-0.03666	-2.837	0.004781		12	GSA-rs12582133	94075628	A	ADD	0.1238	2.843	0.004697
2	rs10203837	195249135	G	-0.1193	0.04207	-0.2018	-0.03689	-2.837	0.004782		1	GSA-rs7530281	234858895	C	ADD	-0.1214	-2.843	0.004698
3	rs112074828	155505991	G	0.1191	0.04197	0.0368	0.2013	2.837	0.004784		14	rs72642528	27397087	A	ADD	-0.1209	-2.843	0.004698
11	rs77771630	114655592	A	0.1195	0.04214	0.03693	0.2021	2.836	0.004788		9	GSA-rs4314695	1290551	G	ADD	-0.1229	-2.842	0.004705
1	rs562445	166730812	A	-0.1192	0.04205	-0.2017	-0.03684	-2.836	0.004792		10	rs11198218	119752955	A	ADD	0.1242	2.842	0.004706
5	rs10072521	141628405	A	0.1191	0.04201	0.0368	0.2015	2.836	0.004793		9	GSA-rs16938590	21909979	G	ADD	-0.1224	-2.842	0.004713
7	rs731770	128366485	A	0.1221	0.04304	0.0377	0.2064	2.836	0.004795		21	rs16981663	29447830	A	ADD	-0.1222	-2.841	0.004716
7	rs2330441	42377219	A	0.1192	0.04203	0.03681	0.2016	2.836	0.004797		3	IlmnSeq_rs9842910	125896572	A	ADD	-0.1213	-2.841	0.004718
4	rs1392750	169745078	G	0.1233	0.0435	0.03807	0.2086	2.835	0.004806		23	rs511475	144256149	A	ADD	0.1229	2.841	0.004719
17	GSA-rs2320954	27729696	G	-0.1196	0.04217	-0.2022	-0.03692	-2.835	0.004806		1	rs6696686	187397277	G	ADD	-0.121	-2.841	0.004723
6	rs3132584	30688427	A	0.1198	0.04227	0.03699	0.2027	2.835	0.004808		14	rs12880780	100053176	A	ADD	0.1219	2.841	0.004724
19	rs12151190	23958292	A	-0.12	0.04233	-0.203	-0.03704	-2.835	0.004809		20	rs61172486	44840185	G	ADD	-0.122	-2.841	0.004724
7	rs12056089	137399820	A	0.1185	0.04181	0.03658	0.2005	2.835	0.00481		21	rs150761	27810723	G	ADD	0.1206	2.841	0.004726
8	rs281721	108623345	C	-0.1183	0.04173	-0.2001	-0.0365	-2.835	0.004813		2	rs1850680	181122167	A	ADD	-0.1203	-2.841	0.004729
8	GSA-rs7838141	77631295	A	0.1205	0.04251	0.03718	0.2038	2.834	0.004817		4	rs5011086	157977505	A	ADD	-0.1233	-2.84	0.004732
3	GSA-rs893923	34132701	A	0.1194	0.04213	0.03684	0.202	2.834	0.004818		5	GSA-rs10078	438102	C	ADD	0.1217	2.84	0.004733
1	rs4310401	80656114	G	0.1214	0.04283	0.03745	0.2054	2.834	0.00482		18	GSA-rs4891353	66698472	A	ADD	-0.1208	-2.84	0.004737
8	rs7814848	142369951	G	-0.1196	0.04219	-0.2022	-0.03688	-2.834	0.004823		3	GSA-rs9290515	174495959	A	ADD	0.1222	2.84	0.004741
2	IlmnSeq_rs2074955	158977794	G	-0.1192	0.04208	-0.2017	-0.03677	-2.834	0.004826		11	rs10908200	69536921	A	ADD	0.1215	2.839	0.004744
4	INMG_11874	183692580	G	0.1195	0.04217	0.03685	0.2022	2.834	0.004826		23	rs7061618	42615376	G	ADD	0.1219	2.839	0.004745
6	rs3957148	32682137	G	-0.1184	0.04178	-0.2003	-0.0365	-2.834	0.004831		5	rs12517270	53549796	A	ADD	-0.1244	-2.839	0.004749
18	rs8093542	20709123	C	0.1235	0.04359	0.03807	0.2089	2.833	0.004835		7	rs7799218	31350544	G	ADD	0.1237	2.839	0.004749
6	GSA-rs3094176	29821270	A	0.1198	0.04228	0.03691	0.2026	2.833	0.004839		1	GSA-rs6587910	61528110	A	ADD	-0.1208	-2.839	0.004751
6	GSA-rs1611698	29827597	A	0.1198	0.04228	0.03691	0.2026	2.833	0.004839		3	rs2241310	10296296	C	ADD	0.1215	2.839	0.004755
6	GSA-rs1611738	29831706	A	0.1198	0.04228	0.03691	0.2026	2.833	0.004839		2	rs17408561	225474277	G	ADD	0.1222	2.839	0.004757
6	GSA-rs1611746	29832692	A	0.1198	0.04228	0.03691	0.2026	2.833	0.004839		9	GSA-rs10812736	28064690	A	ADD	-0.1247	-2.838	0.004764
6	GSA-rs885933	29837158	A	0.1198	0.04228	0.03691	0.2026	2.833	0.004839		23	rs2142012	150357106	G	ADD	-0.1349	-2.838	0.004764
6	rs356971	29979797	C	0.1191	0.04205	0.03671	0.2015	2.833	0.004839		8	rs9886490	62128079	A	ADD	-0.1242	-2.838	0.004767
11	rs1447149	119691069	A	0.1204	0.0425	0.0371	0.2037	2.833	0.00484		12	GSA-rs61935861	130902932	G	ADD	-0.1234	-2.838	0.004767
19	rs1047598	6470070	A	0.1261	0.04451	0.03884	0.2133	2.833	0.004844		6	rs2228213	12124855	A	ADD	0.1233	2.838	0.004769
14	rs3813563	73958812	A	-0.1206	0.04257	-0.204	-0.03713	-2.832	0.004848		14	rs1077948	94501080	A	ADD	0.1217	2.837	0.004777
1	rs11264579	156873463	G	-0.1193	0.04214	-0.2019	-0.03676	-2.832	0.004849		23	JHU_X.88763140	88763141	G	ADD	-0.1272	-2.838	0.004777
4	GSA-rs10022486	162923324	C	-0.1201	0.04242	-0.2033	-0.037	-2.832	0.004852		6	IlmnSeq_rs472703	151341298	G	ADD	-0.1204	-2.837	0.004778
12	rs309023	28968916	A	-0.1218	0.043	-0.206	-0.0375	-2.832	0.004852		6	rs472703	151341298	G	ADD	-0.1204	-2.837	0.004778
6	rs9268853	32429643	G	-0.1185	0.04186	-0.2006	-0.0365	-2.832	0.004854		2	rs2540229	39944055	G	ADD	0.123	2.837	0.004779
4	exm2269954	109636348	G	-0.1213	0.04285	-0.2053	-0.03736	-2.832	0.004857		8	rs10956836	93369304	A	ADD	-0.1213	-2.837	0.004785
20	rs4812337	37562936	G	0.1191	0.04208	0.03667	0.2016	2.832	0.00486		4	IlmnSeq_rs6821566	20959057	G	ADD	0.1224	2.837	0.004786
8	INMG_11764	27328021	A	-0.1191	0.04206	-0.2015	-0.03664	-2.831	0.004868		12	GSA-rs12424072	102270027	A	ADD	-0.1233	-2.837	0.004786
22	rs5747937	18919755	C	-0.1194	0.04219	-0.2021	-0.03674	-2.831	0.00487		9	GSA-rs13294922	115864525	A	ADD	-0.1268	-2.836	0.004787
17	GSA-rs8064434	27671377	A	-0.1191	0.04208	-0.2016	-0.03664	-2.831	0.004873		13	rs7998115	47788770	G	ADD	0.1217	2.836	0.00479
18	GSA-rs62091340	8275266	A	-0.1188	0.04196	-0.201	-0.03655	-2.831	0.004873		1	GSA-rs35688602	87465380	C	ADD	0.1216	2.836	0.004798
13	rs17314215	75673201	A	0.1212	0.04282	0.03729	0.2052	2.831	0.004874		11	rs7478747	81222768	A	ADD	0.1222	2.836	0.0048
22	rs138777	35711098	A	-0.1197	0.04228	-0.2026	-0.03682	-2.831	0.004874		11	rs4936241	134432050	G	ADD	0.1203	2.835	0.004804
18	GSA-rs2305042	57053846	C	-0.1211	0.04279	-0.205	-0.03725	-2.831	0.004875		3	rs10937184	184366735	A	ADD	-0.1212	-2.835	0.004805
5	GSA-rs7700363	10800714	A	-0.1191	0.04206	-0.2015	-0.03661	-2.83	0.004878		11	rs526546	95033529	G	ADD	0.1241	2.835	0.004806
4	rs12331639	47623275	A	-0.1196	0.04227	-0.2024	-0.03676	-2.83	0.004888		11	GSA-rs10501823	94950910	A	ADD	-0.1205	-2.835	0.004812
9	GSA-rs2492626	29939556	G	0.1204	0.04254	0.037	0.2037	2.83	0.004888		17	GSA-rs13341521	27763242	G	ADD	-0.1216	-2.835	0.004817
6	rs1498260	92627946	C	-0.1254	0.0443	-0.2122	-0.03853	-2.83	0.004889		7	GSA-rs12673001	25345407	A	ADD	0.121	2.834	0.00482
8	rs76058586	135305502	C	-0.1187	0.04196	-0.201	-0.03649	-2.83	0.00489		18	GSA-rs35889630	22676398	C	ADD	-0.1207	-2.834	0.00482
2	rs7371392	3083625	G	0.1181	0.04173	0.03629	0.1999	2.83	0.004891		18	rs7227798	49904769	A	ADD	0.1219	2.834	0.00482
6	rs9459416	165834192	G	0.1203	0.04252	0.03698	0.2036	2.83	0.004891		5	GSA-rs11739710	9923541	G	ADD	-0.125	-2.834	0.004821
21	rs7281682	35525015	C	0.1191	0.04208	0.03659	0.2015	2.829	0.004893		9	rs7023329	21816528	G	ADD	0.1208	2.834	0.004832
11	rs10437585	21357846	G	0.1236	0.04368	0.03795	0.2092	2.829	0.004902		10	rs788965	21181703	A	ADD	0.1225	2.833	0.004839
3	rs8178607	93653992	A	0.1187	0.04195	0.03643	0.2009	2.829	0.004906		4	rs356220	90641340	G	ADD	0.1208	2.833	0.004845
17	GSA-rs12602553	35286563	A	0.1197	0.04231	0.03675	0.2026	2.829	0.004906		6	rs9405840	5507182	G	ADD	-0.1207	-2.832	0.004847
2	rs4850382	196949416	A	0.1192	0.04214	0.0366	0.2018	2.828	0.004907		12	rs2288369	51748326	G	ADD	-0.1223	-2.832	0.004848
15	rs28624490	97552095	A	0.122	0.04313	0.03746	0.2065	2.828	0.004907		8	GSA-rs77423083	105122235	A	ADD	0.1224	2.832	0.004849
6	chr6:30270080	30270080	A	-0.1194	0.04224	-0.2022	-0.03666	-2.828	0.004917		17	GSA-rs4795510	27778834	G	ADD	-0.1212	-2.832	0.004855
7	GSA-rs1524986	152949130	A	-0.1184	0.04188	-0.2005	-0.03632	-2.827	0.004926		5	rs17555633	168544872	A	ADD	0.1215	2.832	0.004858
5	rs12153310	178746816	A	0.1184	0.04186	0.0363	0.2004	2.827	0.004927		2	rs13031552	192895571	A	ADD	0.1267	2.832	0.004859
10	GSA-rs1118649	29460122	G	0.1196	0.04229	0.03667	0.2024	2.827	0.004929		12	rs759696	4525155	C	ADD	-0.1232	-2.831	0.004863
23	rs12689044	83668701	A	-0.126	0.04455	-0.2133	-0.03864	-2.827	0.004929		15	rs4537994	99172743	A	ADD	-0.1214	-2.831	0.004876
17	rs718400	70311511	A	0.1186	0.04196	0.03636	0.2008	2.827	0.004936		17	GSA-rs1568373	27760143	A	ADD	-0.1212	-2.831	0.004876
2	IlmnSeq_rs62279335	201527529	A	-0.1192	0.04219	-0.2019	-0.03655	-2.826	0.004938		17	rs2453596	19483571	C	ADD	0.1208	2.83	0.004879
16	IlmnSeq_rs11646690	13889007	A	0.1204	0.0426	0.0369	0.2039	2.826	0.004944		17	rs8069173	71147862	G	ADD	-0.121	-2.83	0.004886
5	rs10056747	25595051	G	-0.12	0.04248	-0.2033	-0.03676	-2.825	0.004953		23	rs5908255	141370154	A	ADD	0.1233	2.83	0.004887
18	IlmnSeq_rs610721	4329893	G	-0.1188	0.04206	-0.2013	-0.0364	-2.825	0.004953		5	rs6885854	115837789	A	ADD	0.1204	2.829	0.004893
7	rs13245186	53101608	G	0.1186	0.04199	0.03634	0.201	2.825	0.004954		15	IlmnSeq_rs785440	30156761	G	ADD	0.1199	2.829	0.004896
2	rs16866133	179022610	C	0.1196	0.04233	0.03659	0.2025	2.824	0.004972		15	rs785440	30156761	G	ADD	0.1199	2.829	0.004896
1	rs204264	167812359	G	-0.1191	0.04219	-0.2018	-0.03645	-2.824	0.004974		17	GSA-rs9901247	27672643	A	ADD	-0.1213	-2.829	0.004898
12	rs797178	10895087	G	-0.1185	0.04195	-0.2007	-0.03624	-2.824	0.004976		5	rs72810906	173271866	G	ADD	0.1213	2.829	0.004902
6	rs9504162	4599442	A	-0.118	0.04179	-0.1999	-0.0361	-2.824	0.004978		7	rs10243282	85711326	G	ADD	0.1205	2.828	0.004907
15	IlmnSeq_rs4775065	58801943	A	0.1189	0.04212	0.03638	0.2015	2.824	0.00498		5	rs900643	125856587	A	ADD	-0.1199	-2.828	0.004909
20	rs6038804	7380696	G	-0.118	0.04179	-0.1999	-0.03609	-2.824	0.00498		2	rs13428444	34759502	A	ADD	-0.1212	-2.828	0.00491
20	rs4814387	15474506	G	0.1194	0.04228	0.03652	0.2022	2.824	0.00498		5	rs253710	94690178	A	ADD	0.1202	2.828	0.004917
8	rs2611367	61036683	A	-0.12	0.04251	-0.2033	-0.03669	-2.823	0.004986		1	rs2800881	112133910	G	ADD	0.1221	2.828	0.004919
16	rs5743289	50756774	A	-0.1209	0.04283	-0.2048	-0.03696	-2.823	0.004991		12	rs521040	10147850	G	ADD	0.1218	2.828	0.00492
5	rs77132701	60616525	G	0.1184	0.04194	0.03618	0.2006	2.823	0.004997		5	rs2560851	16887383	G	ADD	-0.1203	-2.827	0.004923
1	rs377338379	179607282	A	0.1211	0.04292	0.03702	0.2053	2.822	0.004998		8	rs12677724	142225094	A	ADD	0.1206	2.827	0.004923
6	GSA-rs1221638	147535305	A	0.1204	0.04264	0.03678	0.2039	2.822	0.005		6	rs9354419	67085183	C	ADD	-0.1214	-2.827	0.004925
4	GSA-rs77504447	63939009	A	0.1189	0.04212	0.03632	0.2014	2.822	0.005003		1	rs16851602	177590566	A	ADD	-0.1231	-2.827	0.004928
1	rs984222	119503843	C	0.1191	0.04219	0.03637	0.2018	2.822	0.005005		4	IlmnSeq_rs358592	21476990	G	ADD	-0.1202	-2.827	0.00493
9	GSA-rs2196244	83081971	G	-0.1223	0.04335	-0.2073	-0.03736	-2.822	0.005007		7	rs13230503	63729722	A	ADD	-0.1207	-2.827	0.004936
18	rs7244686	65100211	A	0.1196	0.0424	0.03654	0.2027	2.822	0.005007		8	GSA-rs7826015	125837565	G	ADD	-0.1204	-2.826	0.004938
4	rs7697932	101005318	A	0.119	0.04216	0.03633	0.2016	2.822	0.005009		8	rs4871555	125839379	A	ADD	-0.1204	-2.826	0.004938
19	GSA-rs72983111	5258828	G	0.1207	0.04279	0.03687	0.2046	2.822	0.005011		10	rs59184458	90138828	A	ADD	-0.1203	-2.826	0.00494
5	rs10076280	2164846	G	-0.1183	0.04193	-0.2005	-0.03612	-2.821	0.005013		11	rs79324914	112999673	G	ADD	0.1253	2.826	0.004941
11	GSA-rs11988	47261260	A	-0.1196	0.0424	-0.2027	-0.0365	-2.821	0.005021		1	rs11163491	82965831	A	ADD	0.1206	2.826	0.004943
11	GSA-rs11237769	78933721	G	-0.1182	0.04191	-0.2004	-0.03608	-2.821	0.005022		6	rs7757719	82855793	G	ADD	-0.1201	-2.826	0.004948
11	rs73021423	126253641	G	0.1182	0.04191	0.03608	0.2004	2.821	0.005022		12	rs7969076	94096042	G	ADD	-0.1202	-2.826	0.004949
16	rs12919552	6966553	A	0.1187	0.04206	0.03621	0.2011	2.821	0.005022		16	rs837763	88853729	A	ADD	-0.1232	-2.826	0.004951
17	rs3744758	43195663	G	-0.1211	0.04294	-0.2053	-0.03696	-2.821	0.005024		12	IlmnSeq_rs265632	130075335	G	ADD	-0.1214	-2.825	0.004953
23	JHU_X.142455904	142455905	G	-0.1266	0.04488	-0.2146	-0.03863	-2.821	0.005026		8	rs1915413	19108021	A	ADD	0.1199	2.825	0.004954
1	rs115690371	209740185	A	0.1199	0.04252	0.03659	0.2033	2.821	0.005028		11	GSA-rs1124590	77703983	A	ADD	0.1207	2.825	0.004955
1	GSA-rs12733835	68622994	A	0.1181	0.04186	0.03602	0.2001	2.82	0.005029		11	GSA-rs1378308	16111148	A	ADD	-0.121	-2.825	0.004957
8	rs489583	37003868	G	-0.1194	0.04233	-0.2023	-0.03639	-2.82	0.005043		22	rs4820615	25223662	A	ADD	0.1227	2.825	0.004962
17	rs563205	47577619	G	-0.1195	0.04238	-0.2026	-0.03642	-2.819	0.005049		6	rs211222	98980147	A	ADD	-0.1216	-2.825	0.004965
10	rs7898911	73825691	A	-0.119	0.04222	-0.2018	-0.03628	-2.819	0.00505		3	IlmnSeq_rs3773573	55033713	A	ADD	-0.1213	-2.825	0.004967
1	rs2247584	159259680	C	-0.1202	0.04265	-0.2038	-0.03664	-2.819	0.005051		6	GSA-rs9367855	15011780	G	ADD	0.1216	2.824	0.004968
11	GSA-rs11219150	123331791	A	-0.1179	0.04184	-0.1999	-0.03594	-2.819	0.005051		6	rs6458792	51670597	G	ADD	-0.1247	-2.824	0.004974
12	rs76124942	51649429	G	-0.1206	0.04278	-0.2044	-0.03675	-2.819	0.005051		3	rs7636493	196367930	A	ADD	0.1202	2.824	0.004976
3	rs4686146	7688564	C	-0.118	0.04187	-0.2001	-0.03595	-2.819	0.005058		6	rs9275614	32684257	G	ADD	-0.1211	-2.824	0.004977
7	rs11768005	13801764	G	0.1198	0.0425	0.03649	0.2031	2.818	0.005059		6	rs67762923	140683396	G	ADD	0.1205	2.824	0.004979
9	exm2266888	5703443	A	-0.1181	0.04191	-0.2002	-0.03597	-2.818	0.005062		17	GSA-rs8064434	27671377	A	ADD	-0.1206	-2.823	0.004984
4	GSA-rs11100528	164845121	G	0.1186	0.04207	0.03611	0.201	2.818	0.005064		12	rs10785171	75455390	G	ADD	0.123	2.823	0.004989
6	GSA-rs7745238	26423317	A	-0.1194	0.04239	-0.2025	-0.03637	-2.818	0.005067		14	rs17090939	94939550	A	ADD	0.124	2.823	0.004992
23	JHU_X.22122974	22122975	G	-0.1258	0.04466	-0.2134	-0.03831	-2.818	0.00507		8	rs3812475	125463250	G	ADD	-0.1195	-2.823	0.004994
6	rs2647050	32669767	G	0.1179	0.04183	0.03586	0.1998	2.817	0.005079		1	GSA-rs17128784	66774019	A	ADD	0.1211	2.822	0.004998
6	rs2856718	32670255	A	0.1179	0.04183	0.03586	0.1998	2.817	0.005079		3	rs4894793	171027683	G	ADD	-0.122	-2.822	0.004998
17	GSA-rs6505120	27708712	A	-0.119	0.04224	-0.2018	-0.03621	-2.817	0.00508		15	IlmnSeq_rs12594375	58732468	A	ADD	-0.1343	-2.823	0.005
2	rs2571460	218654088	G	0.118	0.04188	0.03588	0.2001	2.817	0.005085		10	GSA-rs150788131	121612523	A	ADD	-0.1217	-2.822	0.005008
3	rs200407963	2854256	A	-0.125	0.04439	-0.212	-0.03802	-2.817	0.00509		2	GSA-rs4854315	494891	G	ADD	-0.1262	-2.821	0.005018
6	rs9405108	32438648	A	-0.1179	0.04188	-0.2	-0.03585	-2.816	0.005098		5	rs10043054	13477537	G	ADD	-0.1208	-2.821	0.005022
10	rs2477036	10532725	G	-0.1219	0.04328	-0.2067	-0.03704	-2.816	0.005101		4	rs3775167	86946141	A	ADD	0.1249	2.821	0.005023
6	rs9474033	51492046	C	-0.1181	0.04195	-0.2003	-0.03589	-2.816	0.005104		7	rs4727411	98388770	A	ADD	0.1207	2.821	0.005027
3	rs4453791	38882519	G	0.1193	0.04239	0.03627	0.2024	2.816	0.005107		9	GSA-rs10812754	28202675	A	ADD	-0.1196	-2.821	0.005027
8	rs2921024	8349087	G	-0.1184	0.04206	-0.2008	-0.03597	-2.815	0.005108		23	rs5970579	150446523	A	ADD	0.1226	2.821	0.005027
2	rs2222890	227529244	G	-0.1205	0.04281	-0.2044	-0.03662	-2.815	0.005109		13	rs1041385	113306882	G	ADD	-0.1203	-2.82	0.005034
5	rs200402995	87826959	C	-0.1182	0.04197	-0.2004	-0.03589	-2.815	0.005111		3	rs6806077	16687807	C	ADD	-0.1209	-2.82	0.005037
4	rs2285778	7725693	A	-0.1174	0.04172	-0.1992	-0.03567	-2.815	0.005113		12	GSA-rs838327	114939288	A	ADD	-0.1237	-2.82	0.005042
14	IlmnSeq_rs55982310	24768952	C	-0.1205	0.04282	-0.2045	-0.03661	-2.815	0.005113		1	rs56058249	39186711	A	ADD	-0.1213	-2.82	0.005043
2	rs10497762	196461111	A	-0.1231	0.04374	-0.2088	-0.03737	-2.814	0.005122		12	rs7315280	117320938	G	ADD	0.1203	2.819	0.005046
11	rs7119457	20639864	A	0.1201	0.04267	0.03645	0.2037	2.814	0.005126		20	rs1223269	13291444	A	ADD	-0.1205	-2.819	0.005052
4	rs62321977	94583187	C	-0.122	0.04335	-0.2069	-0.03702	-2.814	0.00513		9	IlmnSeq_rs2208704	112477726	A	ADD	-0.1228	-2.819	0.005057
7	rs1962611	36660968	A	0.1218	0.0433	0.03697	0.2067	2.814	0.005132		4	rs11729732	183075675	A	ADD	-0.123	-2.819	0.005058
2	rs10186941	20623085	A	-0.1213	0.04311	-0.2058	-0.0368	-2.814	0.005134		4	rs28449192	79431446	A	ADD	0.1198	2.818	0.00506
15	GSA-rs4779141	79999877	G	-0.1191	0.04231	-0.202	-0.03612	-2.814	0.005139		2	rs10178458	228111435	A	ADD	0.1203	2.818	0.005061
5	GSA-rs12187878	3992147	G	-0.1181	0.04196	-0.2003	-0.03581	-2.813	0.005141		13	rs4612929	89405660	A	ADD	0.1215	2.818	0.005064
8	rs2187982	91556317	C	0.119	0.0423	0.03609	0.2019	2.813	0.005141		17	GSA-rs7222766	27679725	A	ADD	-0.1202	-2.818	0.005068
6	rs9268923	32432835	A	-0.1176	0.04181	-0.1996	-0.03567	-2.813	0.005142		17	rs2138852	27703349	G	ADD	-0.1202	-2.818	0.005068
6	rs2395185	32433167	A	-0.1176	0.04181	-0.1996	-0.03567	-2.813	0.005142		7	GSA-rs10230861	80971145	A	ADD	0.121	2.818	0.005069
6	rs9268969	32434349	A	-0.1176	0.04181	-0.1996	-0.03567	-2.813	0.005142		5	rs11242120	131870689	G	ADD	0.1199	2.818	0.005073
4	rs4583804	184628710	C	0.1181	0.04199	0.03581	0.2004	2.813	0.005147		2	rs1440095	42289666	A	ADD	0.1267	2.817	0.005075
2	rs1358402	197321747	G	0.118	0.04196	0.03578	0.2003	2.813	0.005149		3	GSA-rs4283545	57200758	C	ADD	0.1218	2.817	0.005079
20	rs2076554	1915226	A	-0.1177	0.04184	-0.1997	-0.03568	-2.813	0.005149		5	rs505800	3927833	G	ADD	-0.121	-2.817	0.005082
8	rs4735201	91528313	G	0.1187	0.04221	0.03598	0.2014	2.812	0.005152		19	rs899173	14233734	A	ADD	-0.1227	-2.817	0.005085
11	rs763851	33681621	G	-0.1186	0.04218	-0.2013	-0.03595	-2.812	0.005156		3	rs660323	61762630	A	ADD	0.1206	2.817	0.005087
17	GSA-rs6505129	27753618	G	-0.1182	0.04204	-0.2006	-0.03583	-2.812	0.005156		1	rs12064694	24815870	A	ADD	-0.1202	-2.817	0.005088
17	GSA-rs9891920	27773289	A	-0.1182	0.04204	-0.2006	-0.03583	-2.812	0.005156		22	rs965027	45005361	G	ADD	-0.1265	-2.817	0.005088
18	IlmnSeq_rs4799915	34928639	G	-0.121	0.04303	-0.2053	-0.03667	-2.812	0.005157		7	rs75959913	727234	G	ADD	0.1201	2.817	0.005089
6	rs1556111	84776051	C	-0.1197	0.04259	-0.2032	-0.03627	-2.812	0.005167		13	rs2496762	85569924	A	ADD	-0.1202	-2.816	0.0051
6	GSA-rs4712993	26416399	A	-0.1187	0.04224	-0.2015	-0.03595	-2.811	0.005173		5	rs12658875	153788339	A	ADD	0.1235	2.815	0.005108
6	GSA-rs10946829	26426487	A	-0.1187	0.04224	-0.2015	-0.03595	-2.811	0.005173		14	rs11847642	97153198	G	ADD	0.1196	2.815	0.005113
6	GSA-rs2893848	26430981	G	-0.1187	0.04224	-0.2015	-0.03595	-2.811	0.005173		14	rs7156331	35160847	G	ADD	0.1205	2.815	0.005117
6	GSA-rs45499696	26431340	G	-0.1187	0.04224	-0.2015	-0.03595	-2.811	0.005173		15	rs9672774	85965003	A	ADD	-0.1201	-2.815	0.005118
3	GSA-rs259499	21943932	A	-0.1216	0.04325	-0.2063	-0.03681	-2.811	0.005175		3	GSA-rs7627134	24684637	A	ADD	0.1224	2.814	0.005122
10	rs1337429	108992551	A	-0.121	0.04303	-0.2053	-0.03661	-2.811	0.005179		9	GSA-rs10959205	10620739	A	ADD	0.1202	2.814	0.005122
3	rs6781128	195849902	G	-0.1187	0.04225	-0.2015	-0.03593	-2.81	0.005185		23	rs12012827	45089619	C	ADD	0.1222	2.814	0.005123
1	rs12045347	231237265	G	-0.1175	0.0418	-0.1994	-0.03555	-2.81	0.005186		3	GSA-rs2272022	112063850	A	ADD	0.1211	2.814	0.005125
2	GSA-rs4666507	19803695	G	0.1195	0.04251	0.03615	0.2028	2.81	0.005186		23	JHU_X.150444273	150444274	G	ADD	0.125	2.814	0.005128
3	IlmnSeq_rs78064626	68320655	T	-0.12	0.04271	-0.2038	-0.03632	-2.81	0.005187		16	rs12922713	7294493	A	ADD	0.1201	2.813	0.005137
1	rs1773952	233737019	A	-0.1184	0.04214	-0.201	-0.03583	-2.81	0.005188		21	rs2244485	31709691	A	ADD	-0.1215	-2.813	0.005139
12	rs10506947	88229463	G	0.1183	0.04211	0.0358	0.2009	2.81	0.00519		1	rs112481227	223712870	A	ADD	-0.1204	-2.813	0.005143
13	GSA-rs4771962	97446757	A	0.1188	0.04227	0.03593	0.2016	2.81	0.005192		5	rs17057166	159248014	A	ADD	0.1197	2.813	0.005146
11	rs77095316	102572180	A	0.1184	0.04215	0.0358	0.201	2.809	0.005202		15	rs1348759	80625519	G	ADD	0.1204	2.813	0.005146
2	rs12995711	19686824	G	0.1179	0.04197	0.03564	0.2002	2.809	0.005203		17	GSA-rs2716191	67536322	A	ADD	0.123	2.813	0.005152
8	IlmnSeq_rs1081063	31500222	A	0.118	0.04202	0.03569	0.2004	2.809	0.005204		20	GSA-rs6101073	59368903	A	ADD	-0.121	-2.812	0.005156
6	chr6:30274461	30274461	A	0.1188	0.04228	0.0359	0.2016	2.809	0.005208		13	GSA-rs1323161	44000631	A	ADD	-0.1196	-2.812	0.005158
4	rs12503097	27097098	A	-0.1185	0.04218	-0.2012	-0.03581	-2.809	0.00521		6	rs9295077	169014011	A	ADD	-0.12	-2.811	0.005168
23	rs6637514	128094793	G	0.1196	0.04257	0.03613	0.203	2.808	0.005215		11	GSA-rs16932580	16144535	G	ADD	-0.121	-2.811	0.005178
12	rs1566309	115817141	A	0.1179	0.04197	0.03561	0.2001	2.808	0.005218		14	rs17754986	78729308	A	ADD	-0.1196	-2.811	0.005179
15	IlmnSeq_rs744994	88802935	G	-0.1186	0.04225	-0.2014	-0.03584	-2.808	0.00522		15	rs55792173	101968821	G	ADD	-0.1197	-2.811	0.005179
4	rs925642	187678866	A	-0.118	0.04201	-0.2003	-0.03562	-2.808	0.005225		4	rs13136306	189189971	A	ADD	-0.1229	-2.811	0.00518
1	rs66805418	166976836	G	-0.1189	0.04233	-0.2018	-0.03589	-2.808	0.005226		2	rs848609	36816428	A	ADD	0.1219	2.811	0.005181
8	GSA-rs55896502	38460527	G	0.1178	0.04195	0.03557	0.2	2.808	0.005227		7	rs13241845	156094690	G	ADD	-0.12	-2.811	0.005182
3	GSA-rs317593	4052274	G	-0.1217	0.04334	-0.2066	-0.03674	-2.808	0.005229		14	rs9788576	103305548	G	ADD	-0.1221	-2.811	0.005185
6	rs73356375	5521339	G	0.1178	0.04195	0.03554	0.2	2.807	0.005236		18	GSA-rs72963944	66745883	A	ADD	-0.1201	-2.81	0.005189
9	GSA-rs78384910	81473494	G	-0.1175	0.04184	-0.1995	-0.03545	-2.807	0.005236		11	rs11020977	94679494	G	ADD	0.1194	2.81	0.005192
6	rs3008841	40069436	A	0.1216	0.04331	0.03667	0.2065	2.807	0.005247		1	rs2473830	178465988	A	ADD	-0.1211	-2.81	0.005194
6	rs3869075	30727282	C	-0.1198	0.04271	-0.2036	-0.03614	-2.806	0.005252		15	rs1054307	49281624	C	ADD	0.1245	2.81	0.005199
6	rs13214831	30731505	A	-0.1198	0.04271	-0.2036	-0.03614	-2.806	0.005252		23	rs12006756	141697233	A	ADD	0.1212	2.809	0.0052
8	rs6982636	126479315	A	-0.119	0.04242	-0.2022	-0.0359	-2.806	0.005252		4	rs12512185	4874656	G	ADD	-0.1194	-2.809	0.005201
8	rs2980860	126485337	G	-0.119	0.04242	-0.2022	-0.0359	-2.806	0.005252		14	rs2733777	22930808	A	ADD	-0.1201	-2.809	0.005201
23	JHU_X.146354024	146354025	A	-0.1212	0.04321	-0.2059	-0.03655	-2.806	0.00526		3	rs11925604	147268599	A	ADD	-0.1217	-2.81	0.005202
22	rs127190	27816514	G	-0.119	0.04244	-0.2022	-0.03587	-2.805	0.005269		16	rs11642497	66029917	G	ADD	-0.1199	-2.809	0.005215
23	kgp22761841	138869368	G	-0.1208	0.04307	-0.2052	-0.03639	-2.805	0.005272		13	rs1444230	93727410	G	ADD	-0.1191	-2.808	0.005216
2	GSA-rs2291274	186061623	A	-0.118	0.04208	-0.2005	-0.03555	-2.805	0.005275		9	GSA-rs4007429	29312546	C	ADD	-0.121	-2.808	0.005217
23	rs5945608	51201087	A	-0.1185	0.04224	-0.2013	-0.03569	-2.805	0.005275		16	rs2285053	55512377	A	ADD	0.1201	2.808	0.005218
8	rs6999814	41660854	C	-0.118	0.04209	-0.2005	-0.03555	-2.805	0.005278		1	rs1256279	21914362	A	ADD	0.1192	2.808	0.00522
11	rs6590107	124717445	G	-0.1183	0.04218	-0.201	-0.03562	-2.804	0.005279		18	rs2006768	29625206	G	ADD	0.1207	2.808	0.005227
11	GSA-rs2996464	31589199	G	0.1206	0.04298	0.0363	0.2048	2.805	0.00528		4	GSA-rs34302678	66653473	G	ADD	0.1195	2.807	0.005231
8	rs17762432	73519816	A	-0.1185	0.04227	-0.2014	-0.03568	-2.804	0.005286		6	rs6938814	140194296	A	ADD	0.1205	2.807	0.005231
14	rs1998192	29444668	A	-0.1172	0.04179	-0.1991	-0.03527	-2.804	0.005288		2	rs10182066	9955929	G	ADD	-0.1203	-2.807	0.005239
4	rs17054534	169750972	G	-0.1196	0.04267	-0.2033	-0.03601	-2.804	0.005289		14	rs28426081	104626997	A	ADD	-0.1189	-2.807	0.005243
10	rs2864042	106981738	G	-0.1207	0.04303	-0.205	-0.03632	-2.804	0.005289		14	exm2272156	28788618	A	ADD	-0.1199	-2.806	0.005256
13	GSA-rs327130	29521831	A	0.118	0.04208	0.03551	0.2005	2.804	0.005289		21	GSA-rs4818638	23213331	G	ADD	0.1198	2.806	0.005258
4	GSA-rs4689290	5977553	G	-0.1197	0.04271	-0.2034	-0.03603	-2.804	0.005291		16	GSA-rs8060268	31345280	G	ADD	-0.1215	-2.806	0.00526
5	rs884823	174123135	G	-0.1177	0.04197	-0.1999	-0.03541	-2.804	0.005291		11	GSA-rs16907858	10505942	A	ADD	0.1203	2.805	0.005268
16	rs759198	4996094	C	-0.1203	0.04289	-0.2043	-0.03619	-2.804	0.005292		23	kgp22775447	71198116	A	ADD	-0.1221	-2.805	0.005271
15	rs2684789	99492045	G	0.1185	0.04227	0.03566	0.2014	2.804	0.005295		23	JHU_X.86474749	86474750	G	ADD	0.1216	2.805	0.005273
19	rs62118272	9024871	A	0.1191	0.04249	0.03584	0.2024	2.803	0.005297		1	rs4600104	203643581	A	ADD	0.1195	2.805	0.005278
1	rs7546395	203339307	A	-0.118	0.04211	-0.2006	-0.03551	-2.803	0.005298		4	rs17714109	29291586	C	ADD	-0.1197	-2.805	0.00528
15	rs7174119	23078384	A	0.1202	0.04288	0.03616	0.2042	2.803	0.005299		10	IlmnSeq_rs293233	53159076	G	ADD	0.1246	2.805	0.00528
16	rs12925758	84721401	G	0.1171	0.04177	0.03521	0.1989	2.803	0.005304		7	rs55925641	156076068	A	ADD	-0.1201	-2.804	0.005291
6	rs9394003	30315210	G	-0.1183	0.04219	-0.201	-0.03556	-2.803	0.005307		7	rs4719068	70578999	A	ADD	0.1216	2.804	0.005293
6	IlmnSeq_rs1044418	139229872	A	-0.1173	0.04185	-0.1993	-0.03527	-2.803	0.005307		9	GSA-rs706107	33240225	A	ADD	0.1199	2.804	0.005293
12	GSA-rs76362746	95953645	G	0.1171	0.04178	0.0352	0.199	2.802	0.005312		14	rs7152282	100390013	A	ADD	0.1202	2.804	0.005293
17	GSA-rs117674613	13288970	A	-0.119	0.04246	-0.2022	-0.03577	-2.802	0.005313		8	rs77407908	4163822	A	ADD	-0.1201	-2.803	0.005298
1	GSA-rs12022636	4271526	A	0.1186	0.04231	0.03564	0.2015	2.802	0.005314		17	GSA-rs12941267	67553528	A	ADD	0.1231	2.803	0.005302
14	rs4900692	37663548	G	-0.1173	0.04185	-0.1993	-0.03524	-2.802	0.005317		3	rs594372	177275952	A	ADD	-0.1192	-2.803	0.005306
23	rs6631366	31703704	G	0.1184	0.04224	0.03557	0.2012	2.802	0.00532		3	rs9842910	125896572	A	ADD	-0.1195	-2.803	0.005309
2	rs17016602	35647806	G	0.1209	0.04316	0.0363	0.2055	2.801	0.005335		6	rs1481438	99034313	G	ADD	-0.1256	-2.802	0.005314
12	rs4766248	4537421	G	0.1174	0.04191	0.03525	0.1995	2.801	0.005337		14	rs7155454	65502239	G	ADD	-0.1207	-2.802	0.005314
1	rs2404785	224659778	G	0.1181	0.04216	0.03545	0.2007	2.801	0.005338		4	rs72712839	180057127	G	ADD	0.1194	2.802	0.005318
4	rs10517431	58946066	G	-0.1178	0.04205	-0.2002	-0.03536	-2.801	0.00534		14	rs7148144	65499450	A	ADD	0.1192	2.802	0.00532
12	rs7958661	22333724	G	0.1176	0.04198	0.0353	0.1999	2.801	0.005341		7	rs1393672	25590559	A	ADD	0.122	2.802	0.005321
3	rs9855075	171638062	G	0.1173	0.04187	0.03519	0.1993	2.8	0.005345		23	rs5907220	141159682	A	ADD	0.1275	2.802	0.005321
13	rs591205	86322149	A	-0.1172	0.04186	-0.1993	-0.03518	-2.8	0.005346		4	rs62331476	157672679	A	ADD	0.1213	2.802	0.005326
4	rs11726589	25310442	A	0.1177	0.04204	0.03533	0.2001	2.8	0.005347		15	rs56297401	100320536	C	ADD	0.121	2.802	0.005327
13	rs2802409	47707891	A	0.1191	0.04252	0.03573	0.2024	2.8	0.005347		17	GSA-rs4794853	27692739	A	ADD	-0.1198	-2.801	0.005328
8	rs7825524	80799543	G	-0.1173	0.04189	-0.1994	-0.03518	-2.8	0.005356		2	rs145650663	131158755	A	ADD	-0.1207	-2.801	0.00533
19	GSA-rs72999641	13570291	G	0.1173	0.04188	0.03517	0.1994	2.8	0.005357		10	rs1214565	90606099	A	ADD	-0.119	-2.801	0.005331
11	rs2615945	33433623	A	-0.1179	0.04213	-0.2005	-0.03537	-2.8	0.005358		17	rs2378838	59430404	G	ADD	-0.1227	-2.801	0.005331
16	rs55976165	9102931	A	-0.1182	0.04224	-0.201	-0.03544	-2.799	0.005366		1	GSA-rs2881506	164212456	A	ADD	-0.1226	-2.801	0.005335
10	rs74724883	133093369	A	-0.1179	0.04214	-0.2005	-0.03536	-2.799	0.005367		7	rs7801870	6950691	A	ADD	0.1199	2.801	0.005335
18	rs7231771	69838830	A	-0.1192	0.04259	-0.2027	-0.03574	-2.799	0.005367		1	rs7518267	64140881	A	ADD	0.119	2.801	0.005336
1	rs1539486	80722041	G	0.121	0.04324	0.03628	0.2058	2.799	0.005368		6	GSA-rs72563860	148676470	A	ADD	-0.1213	-2.801	0.00534
13	rs798981	32785086	A	0.1169	0.04176	0.03503	0.1987	2.799	0.00537		6	rs235665	124241003	G	ADD	0.1213	2.801	0.005343
12	rs10859915	96027873	A	-0.1194	0.04267	-0.2031	-0.03579	-2.799	0.005372		11	GSA-rs7119509	82330454	G	ADD	0.121	2.8	0.005348
20	rs2745864	17847214	A	0.1179	0.04212	0.03532	0.2004	2.799	0.005376		16	rs6416788	50954247	A	ADD	-0.1203	-2.8	0.005348
5	rs56304344	170934848	G	0.1224	0.04375	0.03667	0.2082	2.798	0.005385		7	rs12706002	114560827	G	ADD	0.1224	2.8	0.005351
3	rs74388374	31920353	A	-0.1202	0.04295	-0.2043	-0.03599	-2.798	0.005387		1	rs72656168	39163474	A	ADD	-0.1205	-2.8	0.005353
18	rs654941	9857247	A	-0.1182	0.04225	-0.201	-0.03537	-2.797	0.005396		10	GSA-rs11004106	55921305	A	ADD	-0.121	-2.8	0.005357
7	GSA-rs80220519	94484052	G	0.1177	0.04207	0.03522	0.2001	2.797	0.005397		13	rs79631676	112788022	A	ADD	-0.1199	-2.8	0.00536
4	GSA-rs1522605	171110103	A	-0.1172	0.0419	-0.1993	-0.03506	-2.797	0.005404		12	GSA-rs2178692	6836051	C	ADD	-0.1185	-2.799	0.005364
16	rs113403633	14046005	A	-0.1169	0.04181	-0.1989	-0.03499	-2.797	0.005406		11	rs2045528	30602310	A	ADD	0.122	2.799	0.005368
1	rs17110345	54777207	C	0.1183	0.04232	0.0354	0.2013	2.796	0.005409		18	rs7239336	37368218	A	ADD	-0.1197	-2.799	0.00537
14	rs1887943	103619047	G	0.1211	0.0433	0.0362	0.2059	2.796	0.00542		8	rs4831356	15788551	G	ADD	-0.1197	-2.799	0.005371
1	rs12086634	209880259	C	0.1174	0.04199	0.03509	0.1997	2.796	0.005423		12	rs1909147	30172287	A	ADD	0.122	2.799	0.005371
15	rs3101609	27842699	G	-0.1176	0.04207	-0.2	-0.03514	-2.795	0.005427		22	rs6005413	27781783	A	ADD	0.1203	2.799	0.005375
15	GSA-rs4779565	32390070	A	-0.1168	0.04178	-0.1987	-0.03489	-2.795	0.005433		8	rs1399395	19111578	C	ADD	0.1188	2.798	0.005381
23	rs1781946	117479815	C	0.1241	0.04438	0.03706	0.211	2.795	0.005436		12	rs2075231	113078394	A	ADD	0.1185	2.798	0.005381
4	rs45539933	141489068	A	0.118	0.04224	0.03523	0.2008	2.794	0.005451		5	rs4975614	1124560	A	ADD	0.1191	2.798	0.005386
2	GSA-rs1440072	223936738	G	0.1168	0.04182	0.03487	0.1988	2.794	0.005454		5	rs10042679	178626760	G	ADD	-0.1207	-2.798	0.005387
7	rs11771949	101286624	G	0.1177	0.04212	0.03512	0.2002	2.794	0.005455		10	GSA-rs7081279	100104314	A	ADD	0.1195	2.798	0.005388
9	GSA-rs117176224	116957897	A	0.118	0.04225	0.03521	0.2008	2.794	0.005458		2	rs6706116	148365842	A	ADD	-0.1227	-2.797	0.005397
14	GSA-rs76314768	69804403	A	-0.1178	0.04217	-0.2004	-0.03515	-2.793	0.00546		15	rs8027803	85915280	G	ADD	-0.1199	-2.797	0.005398
6	rs2245507	30432308	G	0.1193	0.04269	0.03559	0.2029	2.793	0.005462		7	rs7776571	79770050	G	ADD	0.1195	2.797	0.005403
5	GSA-rs12054933	171066567	A	0.1175	0.04206	0.03504	0.1999	2.793	0.005465		13	rs78149100	33967070	A	ADD	-0.1189	-2.797	0.005403
16	rs12325563	51432016	G	-0.1192	0.04266	-0.2028	-0.03554	-2.793	0.005465		10	exm2271392	37559338	A	ADD	-0.1194	-2.797	0.005408
7	rs78169719	157588588	C	0.1185	0.04243	0.03535	0.2017	2.793	0.005466		10	rs4272709	55892389	C	ADD	-0.1209	-2.797	0.005408
8	GSA-rs10090648	21975006	A	0.1207	0.04321	0.03599	0.2054	2.793	0.005468		4	rs11097004	39806505	G	ADD	0.1218	2.796	0.005413
11	rs7109883	134369417	A	-0.1169	0.04186	-0.1989	-0.03486	-2.793	0.005471		5	GSA-rs144597	122223232	A	ADD	0.1221	2.796	0.005414
8	GSA-rs4574844	84615691	C	-0.119	0.0426	-0.2025	-0.03547	-2.793	0.005475		18	GSA-rs2339324	49891896	C	ADD	-0.1203	-2.796	0.005415
23	rs1781970	117443800	A	0.122	0.04368	0.03636	0.2076	2.792	0.005475		2	rs74910640	121908415	G	ADD	0.1193	2.796	0.005418
4	GSA-rs17040982	162307000	G	0.1176	0.04212	0.03506	0.2002	2.792	0.005477		7	rs7456804	34414398	A	ADD	0.1192	2.796	0.005418
6	rs2517862	29821937	A	0.1182	0.04231	0.03522	0.2011	2.792	0.005478		14	rs4901739	57345857	A	ADD	-0.1231	-2.796	0.005421
17	rs11656216	15000850	G	-0.1194	0.04275	-0.2031	-0.03557	-2.792	0.005481		16	IlmnSeq_rs11646690	13889007	A	ADD	0.121	2.796	0.005422
7	rs929354	157045557	G	-0.1169	0.04188	-0.199	-0.03485	-2.792	0.005483		23	rs423613	126358564	G	ADD	-0.1227	-2.796	0.005422
18	GSA-rs1047521	72909505	A	0.118	0.04228	0.03517	0.2009	2.792	0.005488		8	rs10109622	128458151	A	ADD	0.1241	2.796	0.005424
12	GSA-rs1818789	115012666	G	-0.1184	0.04241	-0.2015	-0.03527	-2.792	0.005489		23	rs1202925	150440995	A	ADD	0.1239	2.795	0.005426
2	GSA-rs73979322	191857351	A	-0.1195	0.04281	-0.2034	-0.0356	-2.792	0.005491		9	rs3132306	137440212	G	ADD	0.1189	2.795	0.005432
17	GSA-rs7222766	27679725	A	-0.1173	0.04203	-0.1997	-0.03494	-2.791	0.005494		18	rs1705520	47701744	G	ADD	0.1187	2.795	0.005441
17	rs2138852	27703349	G	-0.1173	0.04203	-0.1997	-0.03494	-2.791	0.005494		12	rs17037229	105879103	A	ADD	0.1207	2.794	0.005443
15	rs56190996	99244876	A	0.1192	0.04269	0.03549	0.2028	2.791	0.005495		16	rs2696852	86324608	A	ADD	0.1202	2.794	0.005443
6	rs1264550	30377198	G	0.1196	0.04284	0.03561	0.2035	2.791	0.005498		22	GSA-rs5758701	42690262	G	ADD	-0.1196	-2.794	0.005443
17	rs11867532	146428	A	-0.117	0.04192	-0.1992	-0.03483	-2.791	0.005505		8	rs7003700	17240078	A	ADD	-0.1186	-2.794	0.005444
6	rs6905572	31731881	A	-0.1193	0.04277	-0.2032	-0.03552	-2.791	0.005507		9	GSA-rs560059	6447196	A	ADD	0.1213	2.794	0.005444
[truncated: 14,486 more rows]
